# Supplementary material for: MAP4K3 inhibits Sirtuin-1 to repress the LKB1–AMPK pathway to promote amino acid-dependent activation of the mTORC1 complex
Source: Life Sci Alliance. 2023 May 23;6(8):e202201525. doi: 10.26508/lsa.202201525 (PMC10205607; doi:10.26508/lsa.202201525)
Supplement: Supplementary file 1 [file LSA-2022-01525_Supplemental_Data_1.xlsx]

## Sheet: WT interactions -keratin
Group	Reference			Description	SC Mock total	SC WT total	SC D154A total	Mass (KD)	Abundance	p value (Mock vs WT)	p value (Mock vs D154A)	p value (WT vs D154A)	WT/Mock	D154A/Mock
6.1	sp	Q8IVH8	M4K3_HUMAN	Mitogen-activated protein kinase kinase kinase kinase 3 OS=Homo sapiens GN=MAP4K3 PE=1 SV=1	0.1	1459	1661	101	1540.71	0	0	0.000297295	14590	16610
71.1	sp	Q9NU22	MDN1_HUMAN	Midasin OS=Homo sapiens GN=MDN1 PE=1 SV=2	0.1	201	103	632	24.03	1.48618e-62	6.55679e-33	1.41737e-08	2010	1030
86.1	sp	Q5T4S7	UBR4_HUMAN	E3 ubiquitin-protein ligase UBR4 OS=Homo sapiens GN=UBR4 PE=1 SV=1	0.1	159	110	573	23.45	7.3419e-50	4.95902e-35	0.00273597	1590	1100
99.1	sp	Q9ULT8	HECD1_HUMAN	E3 ubiquitin-protein ligase HECTD1 OS=Homo sapiens GN=HECTD1 PE=1 SV=3	0.1	131	111	289	41.84	2.16912e-41	2.46846e-35	0.19831	1310	1110
68.1	sp	Q7Z6Z7	HUWE1_HUMAN	E3 ubiquitin-protein ligase HUWE1 OS=Homo sapiens GN=HUWE1 PE=1 SV=3	0.1	119	196	482	32.7	9.31674e-38	4.8156e-61	1.29743e-05	1190	1960
112.1	sp	Q12789	TF3C1_HUMAN	General transcription factor 3C polypeptide 1 OS=Homo sapiens GN=GTF3C1 PE=1 SV=4	0.1	87	126	239	44.61	4.66958e-28	7.07602e-40	0.00736677	870	1260
146.1	sp	Q9UHB9	SRP68_HUMAN	Signal recognition particle 68 kDa protein OS=Homo sapiens GN=SRP68 PE=1 SV=2	0.1	85	80	71	116.71	1.88932e-27	6.22864e-26	0.69707	850	800
53.1	sp	O00507	USP9Y_HUMAN	Probable ubiquitin carboxyl-terminal hydrolase FAF-Y OS=Homo sapiens GN=USP9Y PE=1 SV=2	0.1	81	95	291	30.25	3.09538e-26	1.74676e-30	0.291038	810	950
6.2	sp	Q9Y4K4	M4K5_HUMAN	Mitogen-activated protein kinase kinase kinase kinase 5 OS=Homo sapiens GN=MAP4K5 PE=1 SV=1	0.1	74	97	95	90.02	4.14184e-24	4.32233e-31	0.0781499	740	970
302.1	sp	P49792	RBP2_HUMAN	E3 SUMO-protein ligase RanBP2 OS=Homo sapiens GN=RANBP2 PE=1 SV=2	0.1	67	6	358	10.2	5.56612e-22	0.00393511	1.0923e-14	670	60
216.1	sp	Q8N163	K1967_HUMAN	Protein KIAA1967 OS=Homo sapiens GN=KIAA1967 PE=1 SV=2	0.1	64	47	103	53.97	4.55385e-21	6.93815e-16	0.105932	640	470
6.1	sp	Q12851	M4K2_HUMAN	Mitogen-activated protein kinase kinase kinase kinase 2 OS=Homo sapiens GN=MAP4K2 PE=1 SV=2	0.1	58	87	91	79.24	3.05808e-19	4.66958e-28	0.0156721	580	870
273.1	sp	Q9HAV4	XPO5_HUMAN	Exportin-5 OS=Homo sapiens GN=XPO5 PE=1 SV=1	0.1	53	36	136	32.67	1.02256e-17	1.6165e-12	0.0706768	530	360
229.1	sp	Q13155	AIMP2_HUMAN	Aminoacyl tRNA synthase complex-interacting multifunctional protein 2 OS=Homo sapiens GN=AIMP2 PE=1 SV=2	0.1	51	55	35	150.03	4.16756e-17	2.51067e-18	0.697601	510	550
232.1	sp	Q9HC35	EMAL4_HUMAN	Echinoderm microtubule-associated protein-like 4 OS=Homo sapiens GN=EML4 PE=1 SV=3	0.1	51	52	109	47.31	4.16756e-17	2.06418e-17	0.921509	510	520
323.1	sp	P42858	HD_HUMAN	Huntingtin OS=Homo sapiens GN=HTT PE=1 SV=2	0.1	46	20	347	9.5	1.40219e-15	1.40122e-07	0.00117751	460	200
213.1	sp	Q9UPU5	UBP24_HUMAN	Ubiquitin carboxyl-terminal hydrolase 24 OS=Homo sapiens GN=USP24 PE=1 SV=3	0.1	46	69	294	19.55	1.40219e-15	1.37163e-22	0.0313962	460	690
363.1	sp	Q8NCM8	DYHC2_HUMAN	Cytoplasmic dynein 2 heavy chain 1 OS=Homo sapiens GN=DYNC2H1 PE=1 SV=4	0.1	42	15	492	5.79	2.34463e-14	5.12552e-06	0.000263054	420	150
351.1	sp	Q92797	SYMPK_HUMAN	Symplekin OS=Homo sapiens GN=SYMPK PE=1 SV=2	0.1	40	20	141	21.27	9.60244e-14	1.40122e-07	0.00913643	400	200
269.1	sp	P61011	SRP54_HUMAN	Signal recognition particle 54 kDa protein OS=Homo sapiens GN=SRP54 PE=1 SV=1	0.1	38	53	56	81.73	3.93729e-13	1.02256e-17	0.115021	380	530
291.1	sp	P22102	PUR2_HUMAN	Trifunctional purine biosynthetic protein adenosine-3 OS=Homo sapiens GN=GART PE=1 SV=1	0.1	36	41	108	35.75	1.6165e-12	4.74425e-14	0.568675	360	410
357.1	sp	Q9NVI1	FANCI_HUMAN	Fanconi anemia group I protein OS=Homo sapiens GN=FANCI PE=1 SV=4	0.1	36	22	149	19.43	1.6165e-12	3.34951e-08	0.0646881	360	220
321.1	sp	P13807	GYS1_HUMAN	Glycogen [starch] synthase, muscle OS=Homo sapiens GN=GYS1 PE=1 SV=2	0.1	33	34	84	40.01	1.34845e-11	6.64627e-12	0.902763	330	340
377.1	sp	Q9NRG9	AAAS_HUMAN	Aladin OS=Homo sapiens GN=AAAS PE=1 SV=1	0.1	33	21	60	45.35	1.34845e-11	6.84737e-08	0.101039	330	210
332.1	sp	Q15021	CND1_HUMAN	Condensin complex subunit 1 OS=Homo sapiens GN=NCAPD2 PE=1 SV=3	0.1	32	32	157	20.37	2.73701e-11	2.73701e-11	1	320	320
380.1	sp	Q6PGP7	TTC37_HUMAN	Tetratricopeptide repeat protein 37 OS=Homo sapiens GN=TTC37 PE=1 SV=1	0.1	32	21	175	15.11	2.73701e-11	6.84737e-08	0.129399	320	210
444.1	sp	P46939	UTRO_HUMAN	Utrophin OS=Homo sapiens GN=UTRN PE=1 SV=2	0.1	31	11	394	5.33	5.55794e-11	9.44389e-05	0.00163402	310	110
461.1	sp	Q9BQG0	MBB1A_HUMAN	Myb-binding protein 1A OS=Homo sapiens GN=MYBBP1A PE=1 SV=2	0.1	31	9	149	13.44	5.55794e-11	0.000413044	0.000346866	310	90
282.1	sp	Q07864	DPOE1_HUMAN	DNA polymerase epsilon catalytic subunit A OS=Homo sapiens GN=POLE PE=1 SV=5	0.1	30	53	261	15.88	1.12917e-10	1.02256e-17	0.0110474	300	530
281.1	sp	Q9UPY3	DICER_HUMAN	Endoribonuclease Dicer OS=Homo sapiens GN=DICER1 PE=1 SV=3	0.1	30	54	219	19.22	1.12917e-10	5.06645e-18	0.00836496	300	540
306.1	sp	P30876	RPB2_HUMAN	DNA-directed RNA polymerase II subunit RPB2 OS=Homo sapiens GN=POLR2B PE=1 SV=1	0.1	29	40	134	25.78	2.29523e-10	9.60244e-14	0.184484	290	400
391.1	sp	P57737	CORO7_HUMAN	Coronin-7 OS=Homo sapiens GN=CORO7 PE=1 SV=2	0.1	29	22	101	25.36	2.29523e-10	3.34951e-08	0.326225	290	220
385.1	sp	O75122	CLAP2_HUMAN	CLIP-associating protein 2 OS=Homo sapiens GN=CLASP2 PE=1 SV=2	0.1	28	19	141	16.66	4.66799e-10	2.87057e-07	0.187889	280	190
401.1	sp	P04637	P53_HUMAN	Cellular tumor antigen p53 OS=Homo sapiens GN=TP53 PE=1 SV=4	0.1	28	22	44	57.3	4.66799e-10	3.34951e-08	0.395574	280	220
386.1	sp	P63010	AP2B1_HUMAN	AP-2 complex subunit beta OS=Homo sapiens GN=AP2B1 PE=1 SV=1	0.1	28	24	104	24.88	4.66799e-10	8.03648e-09	0.578912	280	240
350.1	sp	Q8N201	INT1_HUMAN	Integrator complex subunit 1 OS=Homo sapiens GN=INTS1 PE=1 SV=2	0.1	28	32	244	12.29	4.66799e-10	2.73701e-11	0.605443	280	320
400.1	sp	A6NDG6	PGP_HUMAN	Phosphoglycolate phosphatase OS=Homo sapiens GN=PGP PE=1 SV=1	0.1	27	23	34	73.56	9.49917e-10	1.63998e-08	0.571402	270	230
307.1	sp	O76094	SRP72_HUMAN	Signal recognition particle 72 kDa protein OS=Homo sapiens GN=SRP72 PE=1 SV=3	0.1	27	42	75	46.27	9.49917e-10	2.34463e-14	0.0698283	270	420
313.1	sp	P45974	UBP5_HUMAN	Ubiquitin carboxyl-terminal hydrolase 5 OS=Homo sapiens GN=USP5 PE=1 SV=2	0.1	27	41	96	35.52	9.49917e-10	4.74425e-14	0.0884111	270	410
301.1	sp	Q02978	M2OM_HUMAN	Mitochondrial 2-oxoglutarate/malate carrier protein OS=Homo sapiens GN=SLC25A11 PE=1 SV=3	0.1	27	47	34	108.69	9.49917e-10	6.93815e-16	0.0193101	270	470
364.1	sp	Q96T76	MMS19_HUMAN	MMS19 nucleotide excision repair protein homolog OS=Homo sapiens GN=MMS19 PE=1 SV=2	0.1	27	30	113	25.17	9.49917e-10	1.12917e-10	0.691035	270	300
382.1	sp	P49916	DNLI3_HUMAN	DNA ligase 3 OS=Homo sapiens GN=LIG3 PE=1 SV=2	0.1	26	27	113	23.49	1.93425e-09	9.49917e-10	0.890743	260	270
453.1	sp	Q29RF7	PDS5A_HUMAN	Sister chromatid cohesion protein PDS5 homolog A OS=Homo sapiens GN=PDS5A PE=1 SV=1	0.1	24	17	151	13.6	8.03648e-09	1.20931e-06	0.273123	240	170
474.1	sp	Q9UHI6	DDX20_HUMAN	Probable ATP-dependent RNA helicase DDX20 OS=Homo sapiens GN=DDX20 PE=1 SV=2	0.1	24	14	92	20.61	8.03648e-09	1.05811e-05	0.102718	240	140
458.1	sp	Q71RC2	LARP4_HUMAN	La-related protein 4 OS=Homo sapiens GN=LARP4 PE=1 SV=3	0.1	23	18	81	25.45	1.63998e-08	5.88789e-07	0.434308	230	180
390.1	sp	Q14160	SCRIB_HUMAN	Protein scribble homolog OS=Homo sapiens GN=SCRIB PE=1 SV=4	0.1	22	29	175	14.59	3.34951e-08	2.29523e-10	0.326225	220	290
498.1	sp	Q15436	SC23A_HUMAN	Protein transport protein Sec23A OS=Homo sapiens GN=SEC23A PE=1 SV=2	0.1	22	13	86	20.32	3.34951e-08	2.1891e-05	0.12605	220	130
440.1	sp	Q9Y5Q9	TF3C3_HUMAN	General transcription factor 3C polypeptide 3 OS=Homo sapiens GN=GTF3C3 PE=1 SV=1	0.1	22	21	101	21.24	3.34951e-08	6.84737e-08	0.878788	220	210
618.1	sp	Q6P2E9	EDC4_HUMAN	Enhancer of mRNA-decapping protein 4 OS=Homo sapiens GN=EDC4 PE=1 SV=1	0.1	21	2	152	7.59	6.84737e-08	0.096111	1.89281e-05	210	20
566.1	sp	Q9H6S0	YTDC2_HUMAN	Probable ATP-dependent RNA helicase YTHDC2 OS=Homo sapiens GN=YTHDC2 PE=1 SV=2	0.1	21	6	160	8.43	6.84737e-08	0.00393481	0.00297025	210	60
386.1	sp	Q10567	AP1B1_HUMAN	AP-1 complex subunit beta-1 OS=Homo sapiens GN=AP1B1 PE=1 SV=2	0.1	20	24	105	21.04	1.40122e-07	8.03648e-09	0.546217	200	240
496.1	sp	P28288	ABCD3_HUMAN	ATP-binding cassette sub-family D member 3 OS=Homo sapiens GN=ABCD3 PE=1 SV=1	0.1	19	16	75	23.2	2.87057e-07	2.48755e-06	0.611871	190	160
437.1	sp	P35249	RFC4_HUMAN	Replication factor C subunit 4 OS=Homo sapiens GN=RFC4 PE=1 SV=2	0.1	19	25	40	55.47	2.87057e-07	3.94124e-09	0.364965	190	250
293.1	sp	P42356	PI4KA_HUMAN	Phosphatidylinositol 4-kinase alpha OS=Homo sapiens GN=PI4KA PE=1 SV=3	0.1	19	57	231	16.44	2.87057e-07	6.16828e-19	8.23107e-06	190	570
463.1	sp	Q00535	CDK5_HUMAN	Cyclin-dependent kinase 5 OS=Homo sapiens GN=CDK5 PE=1 SV=3	0.1	19	21	33	60.09	2.87057e-07	6.84737e-08	0.75178	190	210
449.1	sp	Q12904	AIMP1_HUMAN	Aminoacyl tRNA synthase complex-interacting multifunctional protein 1 OS=Homo sapiens GN=AIMP1 PE=1 SV=2	0.1	19	23	34	61.17	2.87057e-07	1.63998e-08	0.536785	190	230
456.1	sp	Q9BY44	EIF2A_HUMAN	Eukaryotic translation initiation factor 2A OS=Homo sapiens GN=EIF2A PE=1 SV=3	0.1	19	22	65	31.56	2.87057e-07	3.34951e-08	0.639262	190	220
605.1	sp	O75694	NU155_HUMAN	Nuclear pore complex protein Nup155 OS=Homo sapiens GN=NUP155 PE=1 SV=1	0.1	18	6	155	7.74	5.88789e-07	0.00393511	0.0122179	180	60
514.1	sp	P08240	SRPR_HUMAN	Signal recognition particle receptor subunit alpha OS=Homo sapiens GN=SRPR PE=1 SV=2	0.1	18	14	70	22.93	5.88789e-07	1.05811e-05	0.478925	180	140
352.1	sp	P51398	RT29_HUMAN	28S ribosomal protein S29, mitochondrial OS=Homo sapiens GN=DAP3 PE=1 SV=1	0.1	18	42	46	65.88	5.88789e-07	2.34463e-14	0.00167636	180	420
538.1	sp	Q14676	MDC1_HUMAN	Mediator of DNA damage checkpoint protein 1 OS=Homo sapiens GN=MDC1 PE=1 SV=3	0.1	18	12	227	6.62	5.88789e-07	4.54026e-05	0.271703	180	120
540.1	sp	Q5SRE5	NU188_HUMAN	Nucleoporin NUP188 homolog OS=Homo sapiens GN=NUP188 PE=1 SV=1	0.1	18	12	196	7.66	5.88789e-07	4.54026e-05	0.271703	180	120
302.1	sp	Q68DN6	RGPD1_HUMAN	RANBP2-like and GRIP domain-containing protein 1/2 OS=Homo sapiens GN=RGPD1 PE=1 SV=2	0.1	18	4	197	5.6	5.88789e-07	0.018575	0.00190764	180	40
548.1	sp	Q9P2R3	ANFY1_HUMAN	Ankyrin repeat and FYVE domain-containing protein 1 OS=Homo sapiens GN=ANKFY1 PE=1 SV=2	0.1	18	11	128	11.3	5.88789e-07	9.44389e-05	0.191446	180	110
445.1	sp	A2RRP1	NBAS_HUMAN	Neuroblastoma-amplified sequence OS=Homo sapiens GN=NBAS PE=1 SV=2	0.1	17	25	268	7.82	1.20931e-06	3.94124e-09	0.215639	170	250
302.1	sp	A6NKT7	RGPD3_HUMAN	RanBP2-like and GRIP domain-containing protein 3 OS=Homo sapiens GN=RGPD3 PE=2 SV=2	0.1	17	1	197	4.56	1.20931e-06	0.239607	3.31387e-05	170	10
585.1	sp	O14802	RPC1_HUMAN	DNA-directed RNA polymerase III subunit RPC1 OS=Homo sapiens GN=POLR3A PE=1 SV=2	0.1	17	8	156	8.04	1.20931e-06	0.000869822	0.0686969	170	80
543.1	sp	O15067	PUR4_HUMAN	Phosphoribosylformylglycinamidine synthase OS=Homo sapiens GN=PFAS PE=1 SV=4	0.1	17	13	145	10.37	1.20931e-06	2.1891e-05	0.464544	170	130
503.1	sp	O94822	LTN1_HUMAN	E3 ubiquitin-protein ligase listerin OS=Homo sapiens GN=LTN1 PE=1 SV=6	0.1	17	17	200	8.48	1.20931e-06	1.20923e-06	0.999986	170	170
457.1	sp	P40937	RFC5_HUMAN	Replication factor C subunit 5 OS=Homo sapiens GN=RFC5 PE=1 SV=1	0.1	17	24	38	53.28	1.20931e-06	8.03648e-09	0.273123	170	240
439.1	sp	P46063	RECQ1_HUMAN	ATP-dependent DNA helicase Q1 OS=Homo sapiens GN=RECQL PE=1 SV=3	0.1	17	26	73	29.29	1.20931e-06	1.93425e-09	0.168334	170	260
563.1	sp	P52701	MSH6_HUMAN	DNA mismatch repair protein Msh6 OS=Homo sapiens GN=MSH6 PE=1 SV=2	0.1	17	10	153	8.84	1.20931e-06	0.000197104	0.175454	170	100
466.1	sp	Q14566	MCM6_HUMAN	DNA replication licensing factor MCM6 OS=Homo sapiens GN=MCM6 PE=1 SV=1	0.1	17	22	93	21.01	1.20931e-06	3.34951e-08	0.422701	170	220
416.1	sp	Q14C86	GAPD1_HUMAN	GTPase-activating protein and VPS9 domain-containing protein 1 OS=Homo sapiens GN=GAPVD1 PE=1 SV=2	0.1	17	31	165	14.56	1.20931e-06	5.55794e-11	0.0417998	170	310
601.1	sp	Q15477	SKIV2_HUMAN	Helicase SKI2W OS=Homo sapiens GN=SKIV2L PE=1 SV=3	0.1	17	7	138	8.72	1.20931e-06	0.00184293	0.0381914	170	70
555.1	sp	Q9H2P0	ADNP_HUMAN	Activity-dependent neuroprotector homeobox protein OS=Homo sapiens GN=ADNP PE=1 SV=1	0.1	17	11	123	11.34	1.20931e-06	9.44389e-05	0.254993	170	110
480.1	sp	Q9NZL4	HPBP1_HUMAN	Hsp70-binding protein 1 OS=Homo sapiens GN=HSPBP1 PE=1 SV=1	0.1	17	20	39	46.9	1.20931e-06	1.40122e-07	0.621682	170	200
667.1	sp	Q9Y4A5	TRRAP_HUMAN	Transformation/transcription domain-associated protein OS=Homo sapiens GN=TRRAP PE=1 SV=3	0.1	17	3	437	2.29	1.20931e-06	0.0415105	0.00100557	170	30
534.1	sp	Q9Y5Q8	TF3C5_HUMAN	General transcription factor 3C polypeptide 5 OS=Homo sapiens GN=GTF3C5 PE=1 SV=2	0.1	17	14	60	26.04	1.20931e-06	1.05811e-05	0.589723	170	140
600.1	sp	O14980	XPO1_HUMAN	Exportin-1 OS=Homo sapiens GN=XPO1 PE=1 SV=1	0.1	16	9	123	10.14	2.48755e-06	0.000413044	0.158713	160	90
564.1	sp	O94874	UFL1_HUMAN	E3 UFM1-protein ligase 1 OS=Homo sapiens GN=KIAA0776 PE=1 SV=2	0.1	16	11	90	15.08	2.48755e-06	9.44389e-05	0.334527	160	110
454.1	sp	Q9UBB4	ATX10_HUMAN	Ataxin-10 OS=Homo sapiens GN=ATXN10 PE=1 SV=1	0.1	16	25	53	38.35	2.48755e-06	3.94124e-09	0.158154	160	250
669.1	sp	O15164	TIF1A_HUMAN	Transcription intermediary factor 1-alpha OS=Homo sapiens GN=TRIM24 PE=1 SV=3	0.1	15	5	117	8.56	5.12552e-06	0.00848898	0.0221689	150	50
483.1	sp	O76003	GLRX3_HUMAN	Glutaredoxin-3 OS=Homo sapiens GN=GLRX3 PE=1 SV=2	0.1	15	22	37	49.45	5.12552e-06	3.34951e-08	0.248389	150	220
527.1	sp	P57678	GEMI4_HUMAN	Component of gems 4 OS=Homo sapiens GN=GEMIN4 PE=1 SV=2	0.1	15	16	120	12.92	5.12552e-06	2.48755e-06	0.85745	150	160
519.1	sp	Q9H7D7	WDR26_HUMAN	WD repeat-containing protein 26 OS=Homo sapiens GN=WDR26 PE=1 SV=3	0.1	15	17	72	22.2	5.12552e-06	1.20931e-06	0.723587	150	170
192.1	sp	O14787	TNPO2_HUMAN	Transportin-2 OS=Homo sapiens GN=TNPO2 PE=1 SV=3	0.1	14	14	101	13.82	1.05811e-05	1.05811e-05	1	140	140
467.1	sp	O43242	PSMD3_HUMAN	26S proteasome non-ATPase regulatory subunit 3 OS=Homo sapiens GN=PSMD3 PE=1 SV=2	0.1	14	25	61	32	1.05811e-05	3.94124e-09	0.0761568	140	250
504.1	sp	P62258	1433E_HUMAN	14-3-3 protein epsilon OS=Homo sapiens GN=YWHAE PE=1 SV=1	0.1	14	20	29	58.31	1.05811e-05	1.40122e-07	0.302216	140	200
571.1	sp	P63173	RL38_HUMAN	60S ribosomal protein L38 OS=Homo sapiens GN=RPL38 PE=1 SV=2	0.1	14	13	8	164.36	1.05811e-05	2.1891e-05	0.847372	140	130
491.1	sp	Q04724	TLE1_HUMAN	Transducin-like enhancer protein 1 OS=Homo sapiens GN=TLE1 PE=1 SV=2	0.1	14	14	83	16.84	1.05811e-05	1.05811e-05	1	140	140
491.1	sp	Q04727	TLE4_HUMAN	Transducin-like enhancer protein 4 OS=Homo sapiens GN=TLE4 PE=1 SV=3	0.1	14	14	84	16.73	1.05811e-05	1.05811e-05	1	140	140
696.1	sp	Q53H96	P5CR3_HUMAN	Pyrroline-5-carboxylate reductase 3 OS=Homo sapiens GN=PYCRL PE=1 SV=2	0.1	14	5	29	33.18	1.05811e-05	0.00848898	0.035129	140	50
302.1	sp	Q7Z3J3	RGPD4_HUMAN	RanBP2-like and GRIP domain-containing protein 4 OS=Homo sapiens GN=RGPD4 PE=2 SV=3	0.1	14	1	197	3.8	1.05811e-05	0.239607	0.000245515	140	10
541.1	sp	Q8IZH2	XRN1_HUMAN	5'-3' exoribonuclease 1 OS=Homo sapiens GN=XRN1 PE=1 SV=1	0.1	14	16	194	7.73	1.05811e-05	2.48755e-06	0.7149	140	160
612.1	sp	Q8NFW8	NEUA_HUMAN	N-acylneuraminate cytidylyltransferase OS=Homo sapiens GN=CMAS PE=1 SV=2	0.1	14	10	48	24.82	1.05811e-05	0.000197104	0.413126	140	100
128.1	sp	Q93084	AT2A3_HUMAN	Sarcoplasmic/endoplasmic reticulum calcium ATPase 3 OS=Homo sapiens GN=ATP2A3 PE=1 SV=2	0.1	14	9	114	10.1	1.05811e-05	0.000413044	0.295215	140	90
652.1	sp	Q09472	EP300_HUMAN	Histone acetyltransferase p300 OS=Homo sapiens GN=EP300 PE=1 SV=2	0.1	13	8	264	3.98	2.18894e-05	0.000869757	0.272927	130	80
641.1	sp	O94979	SC31A_HUMAN	Protein transport protein Sec31A OS=Homo sapiens GN=SEC31A PE=1 SV=3	0.1	13	9	133	8.27	2.1891e-05	0.000413044	0.392451	130	90
569.1	sp	P30520	PURA2_HUMAN	Adenylosuccinate synthetase isozyme 2 OS=Homo sapiens GN=ADSS PE=1 SV=3	0.1	13	14	50	26.96	2.1891e-05	1.05811e-05	0.847372	130	140
547.1	sp	P35250	RFC2_HUMAN	Replication factor C subunit 2 OS=Homo sapiens GN=RFC2 PE=1 SV=3	0.1	13	16	39	37.05	2.1891e-05	2.48755e-06	0.577128	130	160
666.1	sp	P50748	KNTC1_HUMAN	Kinetochore-associated protein 1 OS=Homo sapiens GN=KNTC1 PE=1 SV=1	0.1	13	7	251	3.99	2.1891e-05	0.00184293	0.176361	130	70
509.1	sp	P62829	RL23_HUMAN	60S ribosomal protein L23 OS=Homo sapiens GN=RPL23 PE=1 SV=1	0.1	13	20	15	111.06	2.1891e-05	1.40122e-07	0.221259	130	200
676.1	sp	Q01968	OCRL_HUMAN	Inositol polyphosphate 5-phosphatase OCRL-1 OS=Homo sapiens GN=OCRL PE=1 SV=3	0.1	13	7	104	9.6	2.1891e-05	0.00184293	0.176361	130	70
491.1	sp	Q04725	TLE2_HUMAN	Transducin-like enhancer protein 2 OS=Homo sapiens GN=TLE2 PE=1 SV=2	0.1	13	14	80	16.92	2.1891e-05	1.05811e-05	0.847372	130	140
423.1	sp	Q12756	KIF1A_HUMAN	Kinesin-like protein KIF1A OS=Homo sapiens GN=KIF1A PE=2 SV=2	0.1	13	34	191	12.31	2.1891e-05	6.64627e-12	0.0018196	130	340
594.1	sp	Q12769	NU160_HUMAN	Nuclear pore complex protein Nup160 OS=Homo sapiens GN=NUP160 PE=1 SV=3	0.1	13	12	162	7.72	2.1891e-05	4.54026e-05	0.84146	130	120
653.1	sp	Q14683	SMC1A_HUMAN	Structural maintenance of chromosomes protein 1A OS=Homo sapiens GN=SMC1A PE=1 SV=2	0.1	13	8	143	7.34	2.1891e-05	0.000869822	0.272925	130	80
551.1	sp	Q8TC07	TBC15_HUMAN	TBC1 domain family member 15 OS=Homo sapiens GN=TBC1D15 PE=1 SV=2	0.1	13	16	79	18.25	2.1891e-05	2.48755e-06	0.577128	130	160
535.1	sp	Q92974	ARHG2_HUMAN	Rho guanine nucleotide exchange factor 2 OS=Homo sapiens GN=ARHGEF2 PE=1 SV=4	0.1	13	18	111	13.9	2.1891e-05	5.88789e-07	0.368125	130	180
604.1	sp	Q96A65	EXOC4_HUMAN	Exocyst complex component 4 OS=Homo sapiens GN=EXOC4 PE=1 SV=1	0.1	13	11	110	10.87	2.1891e-05	9.44389e-05	0.682918	130	110
762.1	sp	Q96Q15	SMG1_HUMAN	Serine/threonine-protein kinase SMG1 OS=Homo sapiens GN=SMG1 PE=1 SV=3	0.1	13	2	410	1.83	2.1891e-05	0.096111	0.00267932	130	20
568.1	sp	Q9BTW9	TBCD_HUMAN	Tubulin-specific chaperone D OS=Homo sapiens GN=TBCD PE=1 SV=2	0.1	13	14	133	10.19	2.1891e-05	1.05811e-05	0.847372	130	140
545.1	sp	Q9Y3A5	SBDS_HUMAN	Ribosome maturation protein SBDS OS=Homo sapiens GN=SBDS PE=1 SV=4	0.1	13	16	29	50.44	2.1891e-05	2.48755e-06	0.577128	130	160
431.1	sp	O00231	PSD11_HUMAN	26S proteasome non-ATPase regulatory subunit 11 OS=Homo sapiens GN=PSMD11 PE=1 SV=3	0.1	12	33	47	47.43	4.54026e-05	1.34845e-11	0.00141137	120	330
142.1	sp	O00763	ACACB_HUMAN	Acetyl-CoA carboxylase 2 OS=Homo sapiens GN=ACACB PE=1 SV=3	0.1	12	27	276	7.06	4.54026e-05	9.49917e-10	0.0149647	120	270
603.1	sp	P21359	NF1_HUMAN	Neurofibromin OS=Homo sapiens GN=NF1 PE=1 SV=2	0.1	12	12	319	3.76	4.54026e-05	4.54026e-05	1	120	120
609.1	sp	P35251	RFC1_HUMAN	Replication factor C subunit 1 OS=Homo sapiens GN=RFC1 PE=1 SV=4	0.1	12	12	128	9.36	4.54026e-05	4.54026e-05	1	120	120
562.1	sp	P43246	MSH2_HUMAN	DNA mismatch repair protein Msh2 OS=Homo sapiens GN=MSH2 PE=1 SV=1	0.1	12	15	105	12.9	4.54026e-05	5.12552e-06	0.5633	120	150
432.1	sp	P62195	PRS8_HUMAN	26S protease regulatory subunit 8 OS=Homo sapiens GN=PSMC5 PE=1 SV=1	0.1	12	33	46	49.34	4.54026e-05	1.34845e-11	0.00141137	120	330
596.1	sp	Q5JVF3	PCID2_HUMAN	PCI domain-containing protein 2 OS=Homo sapiens GN=PCID2 PE=1 SV=2	0.1	12	13	46	27.17	4.54026e-05	2.1891e-05	0.84146	120	130
694.1	sp	Q86W42	THOC6_HUMAN	THO complex subunit 6 homolog OS=Homo sapiens GN=THOC6 PE=1 SV=1	0.1	12	7	38	25.33	4.54026e-05	0.00184293	0.248554	120	70
554.1	sp	Q8WWL2	SPIR2_HUMAN	Protein spire homolog 2 OS=Homo sapiens GN=SPIRE2 PE=1 SV=3	0.1	12	17	80	18.21	4.54026e-05	1.20931e-06	0.351956	120	170
495.1	sp	Q92615	LAR4B_HUMAN	La-related protein 4B OS=Homo sapiens GN=LARP4B PE=1 SV=3	0.1	12	23	81	21.74	4.54026e-05	1.63998e-08	0.0607631	120	230
633.1	sp	Q96EP5	DAZP1_HUMAN	DAZ-associated protein 1 OS=Homo sapiens GN=DAZAP1 PE=1 SV=1	0.1	12	11	43	26.52	4.54026e-05	9.44389e-05	0.834802	120	110
580.1	sp	Q96L92	SNX27_HUMAN	Sorting nexin-27 OS=Homo sapiens GN=SNX27 PE=1 SV=2	0.1	12	14	61	21.23	4.54026e-05	1.05811e-05	0.694743	120	140
582.1	sp	Q9UBQ7	GRHPR_HUMAN	Glyoxylate reductase/hydroxypyruvate reductase OS=Homo sapiens GN=GRHPR PE=1 SV=1	0.1	12	14	36	36.47	4.54026e-05	1.05811e-05	0.694743	120	140
627.1	sp	Q9Y3T9	NOC2L_HUMAN	Nucleolar complex protein 2 homolog OS=Homo sapiens GN=NOC2L PE=1 SV=4	0.1	12	11	85	13.55	4.54026e-05	9.44389e-05	0.834802	120	110
586.1	sp	Q9Y4B6	VPRBP_HUMAN	Protein VPRBP OS=Homo sapiens GN=VPRBP PE=1 SV=3	0.1	12	13	169	7.4	4.54026e-05	2.1891e-05	0.84146	120	130
435.1	sp	Q9Y6D6	BIG1_HUMAN	Brefeldin A-inhibited guanine nucleotide-exchange protein 1 OS=Homo sapiens GN=ARFGEF1 PE=1 SV=2	0.1	12	32	209	10.54	4.54026e-05	2.73701e-11	0.00213101	120	320
619.1	sp	O60343	TBCD4_HUMAN	TBC1 domain family member 4 OS=Homo sapiens GN=TBC1D4 PE=1 SV=2	0.1	11	12	146	7.85	9.44389e-05	4.54026e-05	0.834802	110	120
760.1	sp	O75376	NCOR1_HUMAN	Nuclear receptor corepressor 1 OS=Homo sapiens GN=NCOR1 PE=1 SV=2	0.1	11	4	270	2.78	9.44389e-05	0.018575	0.0653167	110	40
610.1	sp	P56545	CTBP2_HUMAN	C-terminal-binding protein 2 OS=Homo sapiens GN=CTBP2 PE=1 SV=1	0.1	11	13	49	24.53	9.44389e-05	2.1891e-05	0.682918	110	130
646.1	sp	Q13620	CUL4B_HUMAN	Cullin-4B OS=Homo sapiens GN=CUL4B PE=1 SV=4	0.1	11	11	104	10.59	9.44389e-05	9.44389e-05	1	110	110
201.1	sp	Q9BWF3	RBM4_HUMAN	RNA-binding protein 4 OS=Homo sapiens GN=RBM4 PE=1 SV=1	0.1	11	14	40	31.03	9.44389e-05	1.05811e-05	0.548024	110	140
591.1	sp	Q9NPQ8	RIC8A_HUMAN	Synembryn-A OS=Homo sapiens GN=RIC8A PE=1 SV=3	0.1	11	14	60	20.95	9.44389e-05	1.05811e-05	0.548024	110	140
802.1	sp	O43264	ZW10_HUMAN	Centromere/kinetochore protein zw10 homolog OS=Homo sapiens GN=ZW10 PE=1 SV=3	0.1	10	3	89	7.32	0.000197104	0.0415105	0.0461431	100	30
737.1	sp	O95400	CD2B2_HUMAN	CD2 antigen cytoplasmic tail-binding protein 2 OS=Homo sapiens GN=CD2BP2 PE=1 SV=1	0.1	10	7	38	22.59	0.000197104	0.00184293	0.465686	100	70
702.1	sp	O95487	SC24B_HUMAN	Protein transport protein Sec24B OS=Homo sapiens GN=SEC24B PE=1 SV=2	0.1	10	8	137	6.55	0.000197104	0.000869822	0.637004	100	80
623.1	sp	O95793	STAU1_HUMAN	Double-stranded RNA-binding protein Staufen homolog 1 OS=Homo sapiens GN=STAU1 PE=1 SV=2	0.1	10	13	63	18.21	0.000197104	2.1891e-05	0.531029	100	130
606.1	sp	P29372	3MG_HUMAN	DNA-3-methyladenine glycosylase OS=Homo sapiens GN=MPG PE=1 SV=3	0.1	10	14	33	36.53	0.000197104	1.05811e-05	0.413126	100	140
321.2	sp	P54840	GYS2_HUMAN	Glycogen [starch] synthase, liver OS=Homo sapiens GN=GYS2 PE=1 SV=2	0.1	10	7	81	10.5	0.000197104	0.00184293	0.465686	100	70
574.1	sp	Q02790	FKBP4_HUMAN	Peptidyl-prolyl cis-trans isomerase FKBP4 OS=Homo sapiens GN=FKBP4 PE=1 SV=3	0.1	10	16	52	25.11	0.000197104	2.48755e-06	0.237197	100	160
498.1	sp	Q15437	SC23B_HUMAN	Protein transport protein Sec23B OS=Homo sapiens GN=SEC23B PE=1 SV=2	0.1	10	9	86	10.99	0.000197104	0.000413044	0.818505	100	90
621.1	sp	Q16513	PKN2_HUMAN	Serine/threonine-protein kinase N2 OS=Homo sapiens GN=PKN2 PE=1 SV=1	0.1	10	13	112	10.27	0.000197104	2.1891e-05	0.531029	100	130
298.1	sp	Q8TB72	PUM2_HUMAN	Pumilio homolog 2 OS=Homo sapiens GN=PUM2 PE=1 SV=2	0.1	10	9	114	6.13	0.000197104	0.000413044	0.818505	100	90
558.1	sp	Q8TD19	NEK9_HUMAN	Serine/threonine-protein kinase Nek9 OS=Homo sapiens GN=NEK9 PE=1 SV=2	0.1	10	18	107	13.07	0.000197104	5.88789e-07	0.127895	100	180
746.1	sp	Q96KP1	EXOC2_HUMAN	Exocyst complex component 2 OS=Homo sapiens GN=EXOC2 PE=1 SV=1	0.1	10	6	104	7.69	0.000197104	0.00393511	0.314739	100	60
706.1	sp	Q9UBX3	DIC_HUMAN	Mitochondrial dicarboxylate carrier OS=Homo sapiens GN=SLC25A10 PE=1 SV=2	0.1	10	8	31	28.79	0.000197104	0.000869822	0.637004	100	80
599.1	sp	Q9Y2R9	RT07_HUMAN	28S ribosomal protein S7, mitochondrial OS=Homo sapiens GN=MRPS7 PE=1 SV=2	0.1	10	15	28	44.46	0.000197104	5.12552e-06	0.315677	100	150
716.1	sp	Q9Y5M8	SRPRB_HUMAN	Signal recognition particle receptor subunit beta OS=Homo sapiens GN=SRPRB PE=1 SV=3	0.1	10	8	30	30.32	0.000197104	0.000869822	0.637004	100	80
907.1	sp	O75592	MYCB2_HUMAN	Probable E3 ubiquitin-protein ligase MYCBP2 OS=Homo sapiens GN=MYCBP2 PE=1 SV=3	0.1	9	0.1	510	0.88	0.000413014	1	0.000413014	90	1
912.1	sp	Q5VW36	K1797_HUMAN	Uncharacterized protein KIAA1797 OS=Homo sapiens GN=KIAA1797 PE=1 SV=1	0.1	9	0.1	200	2.25	0.000413014	1	0.000413014	90	1
652.1	sp	Q92793	CBP_HUMAN	CREB-binding protein OS=Homo sapiens GN=CREBBP PE=1 SV=3	0.1	9	5	265	2.64	0.000413014	0.00848898	0.281676	90	50
735.1	sp	O43913	ORC5_HUMAN	Origin recognition complex subunit 5 OS=Homo sapiens GN=ORC5 PE=1 SV=1	0.1	9	8	50	16.91	0.000413044	0.000869822	0.808311	90	80
752.1	sp	O60814	H2B1K_HUMAN	Histone H2B type 1-K OS=Homo sapiens GN=HIST1H2BK PE=1 SV=3	0.1	9	7	14	57.63	0.000413044	0.00184293	0.616614	90	70
752.1	sp	P06899	H2B1J_HUMAN	Histone H2B type 1-J OS=Homo sapiens GN=HIST1H2BJ PE=1 SV=3	0.1	9	7	14	57.57	0.000413044	0.00184293	0.616614	90	70
159.1	sp	P07205	PGK2_HUMAN	Phosphoglycerate kinase 2 OS=Homo sapiens GN=PGK2 PE=1 SV=3	0.1	9	22	45	37.97	0.000413044	3.34951e-08	0.0177179	90	220
726.1	sp	P17858	K6PL_HUMAN	6-phosphofructokinase, liver type OS=Homo sapiens GN=PFKL PE=1 SV=6	0.1	9	8	85	10	0.000413044	0.000869822	0.808311	90	80
752.1	sp	P23527	H2B1O_HUMAN	Histone H2B type 1-O OS=Homo sapiens GN=HIST1H2BO PE=1 SV=3	0.1	9	7	14	57.56	0.000413044	0.00184293	0.616614	90	70
17.1	sp	P31327	CPSM_HUMAN	Carbamoyl-phosphate synthase [ammonia], mitochondrial OS=Homo sapiens GN=CPS1 PE=1 SV=2	0.1	9	6	165	0.61	0.000413044	0.00393481	0.437048	90	60
752.1	sp	P33778	H2B1B_HUMAN	Histone H2B type 1-B OS=Homo sapiens GN=HIST1H2BB PE=1 SV=2	0.1	9	7	14	57.38	0.000413044	0.00184293	0.616614	90	70
752.1	sp	P57053	H2BFS_HUMAN	Histone H2B type F-S OS=Homo sapiens GN=H2BFS PE=1 SV=2	0.1	9	7	14	57.4	0.000413044	0.00184293	0.616614	90	70
744.1	sp	P57740	NU107_HUMAN	Nuclear pore complex protein Nup107 OS=Homo sapiens GN=NUP107 PE=1 SV=1	0.1	9	7	106	7.53	0.000413044	0.00184279	0.616633	90	70
752.1	sp	P58876	H2B1D_HUMAN	Histone H2B type 1-D OS=Homo sapiens GN=HIST1H2BD PE=1 SV=2	0.1	9	7	14	57.44	0.000413044	0.00184293	0.616614	90	70
752.1	sp	P62807	H2B1C_HUMAN	Histone H2B type 1-C/E/F/G/I OS=Homo sapiens GN=HIST1H2BC PE=1 SV=4	0.1	9	7	14	57.56	0.000413044	0.00184293	0.616614	90	70
533.1	sp	Q13557	KCC2D_HUMAN	Calcium/calmodulin-dependent protein kinase type II subunit delta OS=Homo sapiens GN=CAMK2D PE=1 SV=3	0.1	9	8	56	15.09	0.000413044	0.000869822	0.808311	90	80
752.1	sp	Q16778	H2B2E_HUMAN	Histone H2B type 2-E OS=Homo sapiens GN=HIST2H2BE PE=1 SV=3	0.1	9	7	14	57.5	0.000413044	0.00184293	0.616614	90	70
752.1	sp	Q5QNW6	H2B2F_HUMAN	Histone H2B type 2-F OS=Homo sapiens GN=HIST2H2BF PE=1 SV=3	0.1	9	7	14	57.5	0.000413044	0.00184293	0.616614	90	70
752.1	sp	Q8N257	H2B3B_HUMAN	Histone H2B type 3-B OS=Homo sapiens GN=HIST3H2BB PE=1 SV=3	0.1	9	7	14	57.55	0.000413044	0.00184293	0.616614	90	70
727.1	sp	Q8WUM0	NU133_HUMAN	Nuclear pore complex protein Nup133 OS=Homo sapiens GN=NUP133 PE=1 SV=2	0.1	9	8	129	6.59	0.000413044	0.000869822	0.808311	90	80
670.1	sp	Q93034	CUL5_HUMAN	Cullin-5 OS=Homo sapiens GN=CUL5 PE=1 SV=4	0.1	9	11	91	11	0.000413044	9.44389e-05	0.654451	90	110
752.1	sp	Q93079	H2B1H_HUMAN	Histone H2B type 1-H OS=Homo sapiens GN=HIST1H2BH PE=1 SV=3	0.1	9	7	14	57.62	0.000413044	0.00184293	0.616614	90	70
828.1	sp	Q96FV9	THOC1_HUMAN	THO complex subunit 1 OS=Homo sapiens GN=THOC1 PE=1 SV=1	0.1	9	3	76	7.93	0.000413044	0.0415105	0.0764242	90	30
747.1	sp	Q96GD0	PLPP_HUMAN	Pyridoxal phosphate phosphatase OS=Homo sapiens GN=PDXP PE=1 SV=2	0.1	9	7	32	25.25	0.000413044	0.00184293	0.616614	90	70
752.1	sp	Q99877	H2B1N_HUMAN	Histone H2B type 1-N OS=Homo sapiens GN=HIST1H2BN PE=1 SV=3	0.1	9	7	14	57.49	0.000413044	0.00184293	0.616614	90	70
752.1	sp	Q99879	H2B1M_HUMAN	Histone H2B type 1-M OS=Homo sapiens GN=HIST1H2BM PE=1 SV=3	0.1	9	7	14	57.22	0.000413044	0.00184293	0.616614	90	70
752.1	sp	Q99880	H2B1L_HUMAN	Histone H2B type 1-L OS=Homo sapiens GN=HIST1H2BL PE=1 SV=3	0.1	9	7	14	57.37	0.000413044	0.00184293	0.616614	90	70
783.1	sp	Q9BZE4	NOG1_HUMAN	Nucleolar GTP-binding protein 1 OS=Homo sapiens GN=GTPBP4 PE=1 SV=3	0.1	9	5	74	9.47	0.000413044	0.00848898	0.281686	90	50
581.1	sp	Q9GZS3	WDR61_HUMAN	WD repeat-containing protein 61 OS=Homo sapiens GN=WDR61 PE=1 SV=1	0.1	9	17	34	38.74	0.000413044	1.20931e-06	0.113707	90	170
202.1	sp	Q9UHL0	DDX25_HUMAN	ATP-dependent RNA helicase DDX25 OS=Homo sapiens GN=DDX25 PE=1 SV=2	0.1	9	6	55	13.72	0.000413044	0.00393511	0.437031	90	60
703.1	sp	Q9UPT8	ZC3H4_HUMAN	Zinc finger CCCH domain-containing protein 4 OS=Homo sapiens GN=ZC3H4 PE=1 SV=3	0.1	9	9	140	6.42	0.000413044	0.000413044	1	90	90
723.1	sp	Q9UQE7	SMC3_HUMAN	Structural maintenance of chromosomes protein 3 OS=Homo sapiens GN=SMC3 PE=1 SV=2	0.1	9	8	141	6.01	0.000413044	0.000869822	0.808311	90	80
672.1	sp	Q9Y4R8	TELO2_HUMAN	Telomere length regulation protein TEL2 homolog OS=Homo sapiens GN=TELO2 PE=1 SV=2	0.1	9	11	92	10.91	0.000413044	9.44389e-05	0.654451	90	110
778.1	sp	Q9H4A3	WNK1_HUMAN	Serine/threonine-protein kinase WNK1 OS=Homo sapiens GN=WNK1 PE=1 SV=2	0.1	8	6	251	2.79	0.000869757	0.00393481	0.59235	80	60
984.1	sp	Q9NSI8	SAMN1_HUMAN	SAM domain-containing protein SAMSN-1 OS=Homo sapiens GN=SAMSN1 PE=1 SV=1	0.1	8	0.1	42	9.6	0.000869757	1	0.000869757	80	1
435.2	sp	Q9Y6D5	BIG2_HUMAN	Brefeldin A-inhibited guanine nucleotide-exchange protein 2 OS=Homo sapiens GN=ARFGEF2 PE=1 SV=3	0.1	8	25	202	8.42	0.000869757	3.94124e-09	0.00242952	80	250
888.1	sp	O43149	ZZEF1_HUMAN	Zinc finger ZZ-type and EF-hand domain-containing protein 1 OS=Homo sapiens GN=ZZEF1 PE=1 SV=6	0.1	8	2	331	1.51	0.000869822	0.096111	0.0496064	80	20
686.1	sp	O43347	MSI1H_HUMAN	RNA-binding protein Musashi homolog 1 OS=Homo sapiens GN=MSI1 PE=1 SV=1	0.1	8	11	39	24.3	0.000869822	9.44389e-05	0.490389	80	110
787.1	sp	O95470	SGPL1_HUMAN	Sphingosine-1-phosphate lyase 1 OS=Homo sapiens GN=SGPL1 PE=1 SV=3	0.1	8	6	63	11.03	0.000869822	0.00393511	0.592347	80	60
394.1	sp	P24928	RPB1_HUMAN	DNA-directed RNA polymerase II subunit RPB1 OS=Homo sapiens GN=POLR2A PE=1 SV=2	0.1	8	42	217	11.52	0.000869822	2.34463e-14	4.78715e-07	80	420
158.1	sp	P30154	2AAB_HUMAN	Serine/threonine-protein phosphatase 2A 65 kDa regulatory subunit A beta isoform OS=Homo sapiens GN=PPP2R1B PE=1 SV=3	0.1	8	9	66	12.85	0.000869822	0.000413044	0.808311	80	90
539.1	sp	P35658	NU214_HUMAN	Nuclear pore complex protein Nup214 OS=Homo sapiens GN=NUP214 PE=1 SV=2	0.1	8	22	213	7.03	0.000869822	3.34951e-08	0.00914688	80	220
685.1	sp	P42694	HELZ_HUMAN	Probable helicase with zinc finger domain OS=Homo sapiens GN=HELZ PE=1 SV=2	0.1	8	11	219	4.34	0.000869822	9.44389e-05	0.490389	80	110
659.1	sp	P49005	DPOD2_HUMAN	DNA polymerase delta subunit 2 OS=Homo sapiens GN=POLD2 PE=1 SV=1	0.1	8	13	51	20.48	0.000869822	2.1891e-05	0.272925	80	130
598.1	sp	P61081	UBC12_HUMAN	NEDD8-conjugating enzyme Ubc12 OS=Homo sapiens GN=UBE2M PE=1 SV=1	0.1	8	17	21	59.84	0.000869822	1.20931e-06	0.0686969	80	170
504.1	sp	P61981	1433G_HUMAN	14-3-3 protein gamma OS=Homo sapiens GN=YWHAG PE=1 SV=2	0.1	8	14	28	38.89	0.000869822	1.05811e-05	0.197971	80	140
544.1	sp	P82675	RT05_HUMAN	28S ribosomal protein S5, mitochondrial OS=Homo sapiens GN=MRPS5 PE=1 SV=2	0.1	8	22	48	31.26	0.000869822	3.34951e-08	0.00914688	80	220
681.1	sp	Q14318	FKBP8_HUMAN	Peptidyl-prolyl cis-trans isomerase FKBP8 OS=Homo sapiens GN=FKBP8 PE=1 SV=2	0.1	8	12	45	22.45	0.000869822	4.54026e-05	0.369478	80	120
805.1	sp	Q14527	HLTF_HUMAN	Helicase-like transcription factor OS=Homo sapiens GN=HLTF PE=1 SV=2	0.1	8	5	114	5.71	0.000869822	0.00848898	0.403259	80	50
817.1	sp	Q15555	MARE2_HUMAN	Microtubule-associated protein RP/EB family member 2 OS=Homo sapiens GN=MAPRE2 PE=1 SV=1	0.1	8	5	37	17.56	0.000869822	0.00848832	0.403276	80	50
528.1	sp	Q5JSL3	DOC11_HUMAN	Dedicator of cytokinesis protein 11 OS=Homo sapiens GN=DOCK11 PE=1 SV=2	0.1	8	23	238	6.53	0.000869822	1.63998e-08	0.00592913	80	230
779.1	sp	Q6PJG6	BRAT1_HUMAN	BRCA1-associated ATM activator 1 OS=Homo sapiens GN=BRAT1 PE=1 SV=2	0.1	8	6	88	7.95	0.000869822	0.00393511	0.592347	80	60
620.1	sp	Q7LBC6	KDM3B_HUMAN	Lysine-specific demethylase 3B OS=Homo sapiens GN=KDM3B PE=1 SV=2	0.1	8	15	191	6.01	0.000869822	5.12552e-06	0.141221	80	150
589.1	sp	Q7Z3U7	MON2_HUMAN	Protein MON2 homolog OS=Homo sapiens GN=MON2 PE=1 SV=2	0.1	8	17	190	6.57	0.000869822	1.20931e-06	0.0686969	80	170
385.1	sp	Q7Z460	CLAP1_HUMAN	CLIP-associating protein 1 OS=Homo sapiens GN=CLASP1 PE=1 SV=1	0.1	8	7	169	4.43	0.000869822	0.00184293	0.796179	80	70
891.1	sp	Q8N7H5	PAF1_HUMAN	RNA polymerase II-associated factor 1 homolog OS=Homo sapiens GN=PAF1 PE=1 SV=2	0.1	8	2	60	8.34	0.000869822	0.0961193	0.049601	80	20
750.1	sp	Q8WUM4	PDC6I_HUMAN	Programmed cell death 6-interacting protein OS=Homo sapiens GN=PDCD6IP PE=1 SV=1	0.1	8	8	96	8.34	0.000869822	0.000869822	1	80	80
507.1	sp	Q92611	EDEM1_HUMAN	ER degradation-enhancing alpha-mannosidase-like 1 OS=Homo sapiens GN=EDEM1 PE=1 SV=1	0.1	8	8	74	10.85	0.000869822	0.000869822	1	80	80
677.1	sp	Q96EE3	SEH1_HUMAN	Nucleoporin SEH1 OS=Homo sapiens GN=SEH1L PE=1 SV=3	0.1	8	12	40	25.24	0.000869822	4.54026e-05	0.369478	80	120
201.1	sp	Q9BQ04	RBM4B_HUMAN	RNA-binding protein 4B OS=Homo sapiens GN=RBM4B PE=1 SV=1	0.1	8	9	40	21.18	0.000869822	0.000413044	0.808311	80	90
879.1	sp	Q9P2D1	CHD7_HUMAN	Chromodomain-helicase-DNA-binding protein 7 OS=Homo sapiens GN=CHD7 PE=1 SV=3	0.1	8	2	336	1.49	0.000869822	0.096111	0.0496064	80	20
625.1	sp	Q7Z4S6	KI21A_HUMAN	Kinesin-like protein KIF21A OS=Homo sapiens GN=KIF21A PE=1 SV=2	0.1	7	16	187	6.15	0.00184279	2.48755e-06	0.0571741	70	160
714.1	sp	O14579	COPE_HUMAN	Coatomer subunit epsilon OS=Homo sapiens GN=COPE PE=1 SV=3	0.1	7	11	34	26.12	0.00184293	9.44389e-05	0.343761	70	110
810.1	sp	P06132	DCUP_HUMAN	Uroporphyrinogen decarboxylase OS=Homo sapiens GN=UROD PE=1 SV=2	0.1	7	6	41	15.95	0.00184293	0.00393511	0.781406	70	60
871.1	sp	P18031	PTN1_HUMAN	Tyrosine-protein phosphatase non-receptor type 1 OS=Homo sapiens GN=PTPN1 PE=1 SV=1	0.1	7	4	50	11.01	0.00184293	0.0185735	0.362685	70	40
945.1	sp	P46087	NOP2_HUMAN	Putative ribosomal RNA methyltransferase NOP2 OS=Homo sapiens GN=NOP2 PE=1 SV=2	0.1	7	1	89	4.48	0.00184293	0.239607	0.0244595	70	10
793.1	sp	P48651	PTSS1_HUMAN	Phosphatidylserine synthase 1 OS=Homo sapiens GN=PTDSS1 PE=1 SV=1	0.1	7	7	55	12.61	0.00184293	0.00184293	1	70	70
640.1	sp	P49815	TSC2_HUMAN	Tuberin OS=Homo sapiens GN=TSC2 PE=1 SV=2	0.1	7	15	200	5.49	0.00184293	5.12552e-06	0.0844632	70	150
748.1	sp	Q00577	PURA_HUMAN	Transcriptional activator protein Pur-alpha OS=Homo sapiens GN=PURA PE=1 SV=2	0.1	7	9	35	22.93	0.00184293	0.000413014	0.616598	70	90
726.1	sp	Q01813	K6PP_HUMAN	6-phosphofructokinase type C OS=Homo sapiens GN=PFKP PE=1 SV=2	0.1	7	6	86	7.6	0.00184293	0.00393511	0.781406	70	60
698.1	sp	Q04323	UBXN1_HUMAN	UBX domain-containing protein 1 OS=Homo sapiens GN=UBXN1 PE=1 SV=2	0.1	7	12	33	28.52	0.00184293	4.54026e-05	0.248554	70	120
646.1	sp	Q13619	CUL4A_HUMAN	Cullin-4A OS=Homo sapiens GN=CUL4A PE=1 SV=3	0.1	7	6	88	7.42	0.00184293	0.00393511	0.781406	70	60
835.1	sp	Q14258	TRI25_HUMAN	E3 ubiquitin/ISG15 ligase TRIM25 OS=Homo sapiens GN=TRIM25 PE=1 SV=2	0.1	7	5	71	8.46	0.00184293	0.00848898	0.562791	70	50
565.1	sp	Q15008	PSMD6_HUMAN	26S proteasome non-ATPase regulatory subunit 6 OS=Homo sapiens GN=PSMD6 PE=1 SV=1	0.1	7	20	46	29.67	0.00184293	1.40122e-07	0.0106262	70	200
870.1	sp	Q5TDH0	DDI2_HUMAN	Protein DDI1 homolog 2 OS=Homo sapiens GN=DDI2 PE=1 SV=1	0.1	7	4	44	12.36	0.00184293	0.018575	0.362666	70	40
985.1	sp	Q8IY37	DHX37_HUMAN	Probable ATP-dependent RNA helicase DHX37 OS=Homo sapiens GN=DHX37 PE=1 SV=1	0.1	7	0.1	129	2.7	0.00184293	1	0.00184293	70	1
557.1	sp	Q96EB6	SIRT1_HUMAN	NAD-dependent deacetylase sirtuin-1 OS=Homo sapiens GN=SIRT1 PE=1 SV=2	0.1	7	21	82	17.15	0.00184293	6.84737e-08	0.0067984	70	210
850.1	sp	Q9BQ69	MACD1_HUMAN	MACRO domain-containing protein 1 OS=Homo sapiens GN=MACROD1 PE=1 SV=2	0.1	7	5	35	16.91	0.00184293	0.00848898	0.562791	70	50
867.1	sp	Q9NXE4	NSMA3_HUMAN	Sphingomyelin phosphodiesterase 4 OS=Homo sapiens GN=SMPD4 PE=1 SV=2	0.1	7	4	93	5.9	0.00184293	0.018575	0.362666	70	40
673.1	sp	Q9Y3D9	RT23_HUMAN	28S ribosomal protein S23, mitochondrial OS=Homo sapiens GN=MRPS23 PE=1 SV=2	0.1	7	13	22	45.96	0.00184293	2.1891e-05	0.176361	70	130
725.1	sp	Q9Y5L0	TNPO3_HUMAN	Transportin-3 OS=Homo sapiens GN=TNPO3 PE=1 SV=3	0.1	7	10	104	8.16	0.00184293	0.000197104	0.465686	70	100
697.1	sp	Q9Y5X1	SNX9_HUMAN	Sorting nexin-9 OS=Homo sapiens GN=SNX9 PE=1 SV=1	0.1	7	12	67	14.27	0.00184293	4.54026e-05	0.248554	70	120
624.1	sp	Q9Y696	CLIC4_HUMAN	Chloride intracellular channel protein 4 OS=Homo sapiens GN=CLIC4 PE=1 SV=4	0.1	7	16	29	39.99	0.00184293	2.48755e-06	0.0571707	70	160
192.1	sp	Q92973	TNPO1_HUMAN	Transportin-1 OS=Homo sapiens GN=TNPO1 PE=1 SV=2	1	66	58	102	61.1	1.06387e-19	2.56616e-17	0.472344	66	58
142.1	sp	Q13085	ACACA_HUMAN	Acetyl-CoA carboxylase 1 OS=Homo sapiens GN=ACACA PE=1 SV=2	1	61	107	265	31.84	3.28288e-18	6.06708e-32	0.000354577	61	107
705.1	sp	P51665	PSD7_HUMAN	26S proteasome non-ATPase regulatory subunit 7 OS=Homo sapiens GN=PSMD7 PE=1 SV=2	0.1	6	12	37	24.32	0.00393481	4.54026e-05	0.15334	60	120
579.1	sp	P82933	RT09_HUMAN	28S ribosomal protein S9, mitochondrial OS=Homo sapiens GN=MRPS9 PE=1 SV=2	0.1	6	20	46	28.38	0.00393481	1.40122e-07	0.00480108	60	200
533.1	sp	Q13554	KCC2B_HUMAN	Calcium/calmodulin-dependent protein kinase type II subunit beta OS=Homo sapiens GN=CAMK2B PE=1 SV=3	0.1	6	6	73	3.44	0.00393481	0.00393481	1	60	60
622.1	sp	Q15003	CND2_HUMAN	Condensin complex subunit 2 OS=Homo sapiens GN=NCAPH PE=1 SV=3	0.1	6	17	83	13.94	0.00393481	1.20931e-06	0.0192103	60	170
729.1	sp	Q6UXN9	WDR82_HUMAN	WD repeat-containing protein 82 OS=Homo sapiens GN=WDR82 PE=1 SV=1	0.1	6	11	35	24.25	0.00393481	9.44389e-05	0.22183	60	110
958.1	sp	Q7Z5K2	WAPL_HUMAN	Wings apart-like protein homolog OS=Homo sapiens GN=WAPAL PE=1 SV=1	0.1	6	2	133	3.01	0.00393481	0.096111	0.147982	60	20
715.1	sp	Q9ULX3	NOB1_HUMAN	RNA-binding protein NOB1 OS=Homo sapiens GN=NOB1 PE=1 SV=1	0.1	6	12	47	19.29	0.00393481	4.54026e-05	0.15334	60	120
712.1	sp	O00165	HAX1_HUMAN	HCLS1-associated protein X-1 OS=Homo sapiens GN=HAX1 PE=1 SV=2	0.1	6	12	32	28.48	0.00393511	4.54026e-05	0.153332	60	120
963.1	sp	O00411	RPOM_HUMAN	DNA-directed RNA polymerase, mitochondrial OS=Homo sapiens GN=POLRMT PE=1 SV=2	0.1	6	2	139	2.89	0.00393511	0.096111	0.147989	60	20
880.1	sp	O60701	UGDH_HUMAN	UDP-glucose 6-dehydrogenase OS=Homo sapiens GN=UGDH PE=1 SV=1	0.1	6	4	55	9.09	0.00393511	0.018575	0.525693	60	40
733.1	sp	O95299	NDUAA_HUMAN	NADH dehydrogenase [ubiquinone] 1 alpha subcomplex subunit 10, mitochondrial OS=Homo sapiens GN=NDUFA10 PE=1 SV=1	0.1	6	11	41	20.87	0.00393511	9.44389e-05	0.22182	60	110
933.1	sp	P13674	P4HA1_HUMAN	Prolyl 4-hydroxylase subunit alpha-1 OS=Homo sapiens GN=P4HA1 PE=1 SV=2	0.1	6	3	61	7.38	0.00393511	0.0415139	0.312663	60	30
809.1	sp	P19388	RPAB1_HUMAN	DNA-directed RNA polymerases I, II, and III subunit RPABC1 OS=Homo sapiens GN=POLR2E PE=1 SV=4	0.1	6	7	25	26.49	0.00393511	0.00184293	0.781406	60	70
791.1	sp	P24390	ERD21_HUMAN	ER lumen protein retaining receptor 1 OS=Homo sapiens GN=KDELR1 PE=1 SV=1	0.1	6	8	25	28.54	0.00393511	0.000869822	0.592347	60	80
915.1	sp	P41214	EIF2D_HUMAN	Eukaryotic translation initiation factor 2D OS=Homo sapiens GN=EIF2D PE=1 SV=3	0.1	6	3	65	6.96	0.00393511	0.0415105	0.312682	60	30
859.1	sp	P46379	BAG6_HUMAN	Large proline-rich protein BAG6 OS=Homo sapiens GN=BAG6 PE=1 SV=2	0.1	6	5	119	4.61	0.00393511	0.00848898	0.762866	60	50
852.1	sp	P55735	SEC13_HUMAN	Protein SEC13 homolog OS=Homo sapiens GN=SEC13 PE=1 SV=3	0.1	6	6	36	16.89	0.00393511	0.00393511	1	60	60
864.1	sp	P62280	RS11_HUMAN	40S ribosomal protein S11 OS=Homo sapiens GN=RPS11 PE=1 SV=3	0.1	6	5	18	29.86	0.00393511	0.00848898	0.762866	60	50
814.1	sp	P62841	RS15_HUMAN	40S ribosomal protein S15 OS=Homo sapiens GN=RPS15 PE=1 SV=2	0.1	6	7	17	38.17	0.00393511	0.00184293	0.781406	60	70
770.1	sp	P62873	GBB1_HUMAN	Guanine nucleotide-binding protein G(I)/G(S)/G(T) subunit beta-1 OS=Homo sapiens GN=GNB1 PE=1 SV=3	0.1	6	9	37	20.08	0.00393511	0.000413044	0.437031	60	90
770.1	sp	P62879	GBB2_HUMAN	Guanine nucleotide-binding protein G(I)/G(S)/G(T) subunit beta-2 OS=Homo sapiens GN=GNB2 PE=1 SV=3	0.1	6	9	37	20.1	0.00393511	0.000413044	0.437031	60	90
872.1	sp	Q6L8Q7	PDE12_HUMAN	2',5'-phosphodiesterase 12 OS=Homo sapiens GN=PDE12 PE=1 SV=2	0.1	6	5	67	8.17	0.00393511	0.00848898	0.762866	60	50
790.1	sp	Q86UK7	ZN598_HUMAN	Zinc finger protein 598 OS=Homo sapiens GN=ZNF598 PE=1 SV=1	0.1	6	8	99	7.1	0.00393511	0.000869822	0.592347	60	80
832.1	sp	Q92945	FUBP2_HUMAN	Far upstream element-binding protein 2 OS=Homo sapiens GN=KHSRP PE=1 SV=4	0.1	6	6	73	8.21	0.00393511	0.00393511	1	60	60
849.1	sp	Q96S59	RANB9_HUMAN	Ran-binding protein 9 OS=Homo sapiens GN=RANBP9 PE=1 SV=1	0.1	6	6	78	7.71	0.00393511	0.00393511	1	60	60
1026.1	sp	Q96ST3	SIN3A_HUMAN	Paired amphipathic helix protein Sin3a OS=Homo sapiens GN=SIN3A PE=1 SV=2	0.1	6	0.1	145	2.07	0.00393511	1	0.00393511	60	1
575.1	sp	Q9BWD1	THIC_HUMAN	Acetyl-CoA acetyltransferase, cytosolic OS=Homo sapiens GN=ACAT2 PE=1 SV=2	0.1	6	20	41	31.46	0.00393511	1.40122e-07	0.00480067	60	200
770.1	sp	Q9HAV0	GBB4_HUMAN	Guanine nucleotide-binding protein subunit beta-4 OS=Homo sapiens GN=GNB4 PE=1 SV=3	0.1	6	9	38	19.98	0.00393511	0.000413044	0.437031	60	90
1045.1	sp	Q9NTI5	PDS5B_HUMAN	Sister chromatid cohesion protein PDS5 homolog B OS=Homo sapiens GN=PDS5B PE=1 SV=1	0.1	6	0.1	165	1.82	0.00393511	1	0.00393511	60	1
931.1	sp	Q9NW82	WDR70_HUMAN	WD repeat-containing protein 70 OS=Homo sapiens GN=WDR70 PE=1 SV=1	0.1	6	3	73	6.15	0.00393511	0.0415105	0.312682	60	30
854.1	sp	Q9UI36	DACH1_HUMAN	Dachshund homolog 1 OS=Homo sapiens GN=DACH1 PE=1 SV=2	0.1	6	6	79	7.64	0.00393511	0.00393511	1	60	60
1067.1	sp	Q9UM00	TMCO1_HUMAN	Transmembrane and coiled-coil domain-containing protein 1 OS=Homo sapiens GN=TMCO1 PE=1 SV=1	0.1	6	0.1	21	14.18	0.00393511	1	0.00393511	60	1
769.1	sp	Q9UNS2	CSN3_HUMAN	COP9 signalosome complex subunit 3 OS=Homo sapiens GN=COPS3 PE=1 SV=3	0.1	6	9	48	15.68	0.00393511	0.000413044	0.437031	60	90
910.1	sp	Q9UNX4	WDR3_HUMAN	WD repeat-containing protein 3 OS=Homo sapiens GN=WDR3 PE=1 SV=1	0.1	6	3	106	4.24	0.00393511	0.0415105	0.312682	60	30
745.1	sp	Q9Y3F4	STRAP_HUMAN	Serine-threonine kinase receptor-associated protein OS=Homo sapiens GN=STRAP PE=1 SV=1	0.1	6	10	38	20.83	0.00393511	0.000197104	0.314739	60	100
839.1	sp	Q9Y3Z3	SAMH1_HUMAN	SAM domain and HD domain-containing protein 1 OS=Homo sapiens GN=SAMHD1 PE=1 SV=2	0.1	6	6	72	8.32	0.00393511	0.00393511	1	60	60
207.1	sp	O95602	RPA1_HUMAN	DNA-directed RNA polymerase I subunit RPA1 OS=Homo sapiens GN=POLR1A PE=1 SV=2	1	57	61	195	30.56	5.09156e-17	3.28288e-18	0.712676	57	61
845.1	sp	O00743	PPP6_HUMAN	Serine/threonine-protein phosphatase 6 catalytic subunit OS=Homo sapiens GN=PPP6C PE=1 SV=1	0.1	5	7	35	17.08	0.00848832	0.00184293	0.562813	50	70
302.1	sp	O14715	RGPD8_HUMAN	RANBP2-like and GRIP domain-containing protein 8 OS=Homo sapiens GN=RGPD8 PE=1 SV=2	0.1	5	0.1	199	1.26	0.00848832	1	0.00848832	50	1
970.1	sp	O60678	ANM3_HUMAN	Protein arginine N-methyltransferase 3 OS=Homo sapiens GN=PRMT3 PE=1 SV=3	0.1	5	3	60	6.68	0.00848832	0.0415105	0.477167	50	30
654.1	sp	O95373	IPO7_HUMAN	Importin-7 OS=Homo sapiens GN=IPO7 PE=1 SV=1	0.1	5	16	119	8.79	0.00848832	2.48755e-06	0.0138332	50	160
825.1	sp	P23258	TBG1_HUMAN	Tubulin gamma-1 chain OS=Homo sapiens GN=TUBG1 PE=1 SV=2	0.1	5	7	51	11.73	0.00848832	0.00184293	0.562813	50	70
429.1	sp	P52790	HXK3_HUMAN	Hexokinase-3 OS=Homo sapiens GN=HK3 PE=1 SV=2	0.1	5	6	99	6.06	0.00848832	0.00393481	0.762868	50	60
533.1	sp	Q13555	KCC2G_HUMAN	Calcium/calmodulin-dependent protein kinase type II subunit gamma OS=Homo sapiens GN=CAMK2G PE=1 SV=3	0.1	5	5	63	2.4	0.00848832	0.00848832	1	50	50
1029.1	sp	Q6P158	DHX57_HUMAN	Putative ATP-dependent RNA helicase DHX57 OS=Homo sapiens GN=DHX57 PE=1 SV=2	0.1	5	1	156	1.93	0.00848832	0.239607	0.087982	50	10
982.1	sp	Q92597	NDRG1_HUMAN	Protein NDRG1 OS=Homo sapiens GN=NDRG1 PE=1 SV=1	0.1	5	3	43	9.34	0.00848832	0.0415105	0.477167	50	30
823.1	sp	Q9H0C8	ILKAP_HUMAN	Integrin-linked kinase-associated serine/threonine phosphatase 2C OS=Homo sapiens GN=ILKAP PE=1 SV=1	0.1	5	7	43	13.99	0.00848832	0.00184293	0.562813	50	70
990.1	sp	Q9H9A5	CNOTA_HUMAN	CCR4-NOT transcription complex subunit 10 OS=Homo sapiens GN=CNOT10 PE=1 SV=1	0.1	5	2	82	4.25	0.00848832	0.0961193	0.249098	50	20
1103.1	sp	A8CG34	P121C_HUMAN	Nuclear envelope pore membrane protein POM 121C OS=Homo sapiens GN=POM121C PE=1 SV=2	0.1	5	0.1	125	2	0.00848898	1	0.00848898	50	1
996.1	sp	O15226	NKRF_HUMAN	NF-kappa-B-repressing factor OS=Homo sapiens GN=NKRF PE=1 SV=2	0.1	5	2	78	4.51	0.00848898	0.0961193	0.24911	50	20
959.1	sp	O75381	PEX14_HUMAN	Peroxisomal membrane protein PEX14 OS=Homo sapiens GN=PEX14 PE=1 SV=1	0.1	5	3	41	9.71	0.00848898	0.0415139	0.477162	50	30
841.1	sp	P22830	HEMH_HUMAN	Ferrochelatase, mitochondrial OS=Homo sapiens GN=FECH PE=1 SV=2	0.1	5	7	48	12.54	0.00848898	0.00184293	0.562791	50	70
960.1	sp	P50851	LRBA_HUMAN	Lipopolysaccharide-responsive and beige-like anchor protein OS=Homo sapiens GN=LRBA PE=1 SV=4	0.1	5	1	319	0.94	0.00848898	0.239607	0.0879876	50	10
1023.1	sp	P51617	IRAK1_HUMAN	Interleukin-1 receptor-associated kinase 1 OS=Homo sapiens GN=IRAK1 PE=1 SV=2	0.1	5	2	76	4.58	0.00848898	0.096111	0.24913	50	20
878.1	sp	P51965	UB2E1_HUMAN	Ubiquitin-conjugating enzyme E2 E1 OS=Homo sapiens GN=UBE2E1 PE=1 SV=1	0.1	5	6	21	25.71	0.00848898	0.00393511	0.762866	50	60
940.1	sp	P55010	IF5_HUMAN	Eukaryotic translation initiation factor 5 OS=Homo sapiens GN=EIF5 PE=1 SV=2	0.1	5	4	49	9.15	0.00848898	0.018575	0.738623	50	40
935.1	sp	P56937	DHB7_HUMAN	3-keto-steroid reductase OS=Homo sapiens GN=HSD17B7 PE=1 SV=1	0.1	5	4	38	11.79	0.00848898	0.0185735	0.738649	50	40
821.1	sp	P61962	DCAF7_HUMAN	DDB1- and CUL4-associated factor 7 OS=Homo sapiens GN=DCAF7 PE=1 SV=1	0.1	5	8	39	16.71	0.00848898	0.000869822	0.403259	50	80
785.1	sp	P82914	RT15_HUMAN	28S ribosomal protein S15, mitochondrial OS=Homo sapiens GN=MRPS15 PE=1 SV=1	0.1	5	9	30	23.47	0.00848898	0.000413044	0.281686	50	90
950.1	sp	Q12788	TBL3_HUMAN	Transducin beta-like protein 3 OS=Homo sapiens GN=TBL3 PE=1 SV=2	0.1	5	3	89	4.5	0.00848898	0.0415139	0.477162	50	30
844.1	sp	Q12923	PTN13_HUMAN	Tyrosine-protein phosphatase non-receptor type 13 OS=Homo sapiens GN=PTPN13 PE=1 SV=2	0.1	5	7	277	2.17	0.00848898	0.00184293	0.562791	50	70
1011.1	sp	Q13618	CUL3_HUMAN	Cullin-3 OS=Homo sapiens GN=CUL3 PE=1 SV=2	0.1	5	2	89	3.94	0.00848898	0.096111	0.24913	50	20
874.1	sp	Q13685	AAMP_HUMAN	Angio-associated migratory cell protein OS=Homo sapiens GN=AAMP PE=1 SV=2	0.1	5	6	47	11.77	0.00848898	0.00393511	0.762866	50	60
882.1	sp	Q14669	TRIPC_HUMAN	Probable E3 ubiquitin-protein ligase TRIP12 OS=Homo sapiens GN=TRIP12 PE=1 SV=1	0.1	5	5	220	2.27	0.00848898	0.00848898	1	50	50
918.1	sp	Q14966	ZN638_HUMAN	Zinc finger protein 638 OS=Homo sapiens GN=ZNF638 PE=1 SV=2	0.1	5	4	220	2.04	0.00848898	0.0185735	0.738649	50	40
948.1	sp	Q68CP9	ARID2_HUMAN	AT-rich interactive domain-containing protein 2 OS=Homo sapiens GN=ARID2 PE=1 SV=2	0.1	5	3	197	2.03	0.00848898	0.0415105	0.477187	50	30
939.1	sp	Q6NUQ1	RINT1_HUMAN	RAD50-interacting protein 1 OS=Homo sapiens GN=RINT1 PE=1 SV=1	0.1	5	4	91	4.97	0.00848898	0.018575	0.738623	50	40
926.1	sp	Q7KZI7	MARK2_HUMAN	Serine/threonine-protein kinase MARK2 OS=Homo sapiens GN=MARK2 PE=1 SV=2	0.1	5	4	88	5.12	0.00848898	0.018575	0.738623	50	40
908.1	sp	Q7L014	DDX46_HUMAN	Probable ATP-dependent RNA helicase DDX46 OS=Homo sapiens GN=DDX46 PE=1 SV=2	0.1	5	4	117	3.84	0.00848898	0.018575	0.738623	50	40
943.1	sp	Q8IX01	SUGP2_HUMAN	SURP and G-patch domain-containing protein 2 OS=Homo sapiens GN=SUGP2 PE=1 SV=2	0.1	5	3	120	3.33	0.00848898	0.0415105	0.477187	50	30
898.1	sp	Q8NBM4	UBAC2_HUMAN	Ubiquitin-associated domain-containing protein 2 OS=Homo sapiens GN=UBAC2 PE=2 SV=1	0.1	5	5	39	12.84	0.00848898	0.00848832	0.999975	50	50
920.1	sp	Q92547	TOPB1_HUMAN	DNA topoisomerase 2-binding protein 1 OS=Homo sapiens GN=TOPBP1 PE=1 SV=3	0.1	5	4	171	2.64	0.00848898	0.0185735	0.738649	50	40
878.1	sp	Q969T4	UB2E3_HUMAN	Ubiquitin-conjugating enzyme E2 E3 OS=Homo sapiens GN=UBE2E3 PE=1 SV=1	0.1	5	6	23	24.02	0.00848898	0.00393511	0.762866	50	60
1010.1	sp	Q96CW1	AP2M1_HUMAN	AP-2 complex subunit mu OS=Homo sapiens GN=AP2M1 PE=1 SV=2	0.1	5	2	50	7.05	0.00848898	0.096111	0.24913	50	20
811.1	sp	Q96D46	NMD3_HUMAN	60S ribosomal export protein NMD3 OS=Homo sapiens GN=NMD3 PE=1 SV=1	0.1	5	8	58	11.29	0.00848898	0.000869822	0.403259	50	80
730.1	sp	Q96DH6	MSI2H_HUMAN	RNA-binding protein Musashi homolog 2 OS=Homo sapiens GN=MSI2 PE=1 SV=1	0.1	5	12	35	24.16	0.00848898	4.54026e-05	0.0848277	50	120
1021.1	sp	Q96EK6	GNA1_HUMAN	Glucosamine 6-phosphate N-acetyltransferase OS=Homo sapiens GN=GNPNAT1 PE=1 SV=1	0.1	5	2	21	16.88	0.00848898	0.096111	0.24913	50	20
1103.1	sp	Q96HA1	P121A_HUMAN	Nuclear envelope pore membrane protein POM 121 OS=Homo sapiens GN=POM121 PE=1 SV=2	0.1	5	0.1	128	1.96	0.00848898	1	0.00848898	50	1
878.1	sp	Q96LR5	UB2E2_HUMAN	Ubiquitin-conjugating enzyme E2 E2 OS=Homo sapiens GN=UBE2E2 PE=1 SV=1	0.1	5	6	22	24.73	0.00848898	0.00393511	0.762866	50	60
830.1	sp	Q96P11	NSUN5_HUMAN	Putative methyltransferase NSUN5 OS=Homo sapiens GN=NSUN5 PE=1 SV=2	0.1	5	7	47	12.86	0.00848898	0.00184293	0.562791	50	70
707.1	sp	Q9BT78	CSN4_HUMAN	COP9 signalosome complex subunit 4 OS=Homo sapiens GN=COPS4 PE=1 SV=1	0.1	5	13	46	19.46	0.00848898	2.1891e-05	0.0549706	50	130
896.1	sp	Q9BTT0	AN32E_HUMAN	Acidic leucine-rich nuclear phosphoprotein 32 family member E OS=Homo sapiens GN=ANP32E PE=1 SV=1	0.1	5	5	31	16.3	0.00848898	0.00848898	1	50	50
390.2	sp	Q9BTT6	LRRC1_HUMAN	Leucine-rich repeat-containing protein 1 OS=Homo sapiens GN=LRRC1 PE=1 SV=1	0.1	5	7	59	10.13	0.00848898	0.00184293	0.562791	50	70
965.1	sp	Q9BTX1	NDC1_HUMAN	Nucleoporin NDC1 OS=Homo sapiens GN=TMEM48 PE=1 SV=2	0.1	5	3	76	5.25	0.00848898	0.0415105	0.477187	50	30
903.1	sp	Q9BVJ6	UT14A_HUMAN	U3 small nucleolar RNA-associated protein 14 homolog A OS=Homo sapiens GN=UTP14A PE=1 SV=1	0.1	5	5	88	5.69	0.00848898	0.00848898	1	50	50
1003.1	sp	Q9BW27	NUP85_HUMAN	Nuclear pore complex protein Nup85 OS=Homo sapiens GN=NUP85 PE=1 SV=1	0.1	5	2	75	4.67	0.00848898	0.096111	0.24913	50	20
981.1	sp	Q9H269	VPS16_HUMAN	Vacuolar protein sorting-associated protein 16 homolog OS=Homo sapiens GN=VPS16 PE=1 SV=2	0.1	5	3	95	4.23	0.00848898	0.0415139	0.477162	50	30
657.1	sp	Q9H2G2	SLK_HUMAN	STE20-like serine/threonine-protein kinase OS=Homo sapiens GN=SLK PE=1 SV=1	0.1	5	16	143	7.36	0.00848898	2.48755e-06	0.013832	50	160
890.1	sp	Q9H4L7	SMRCD_HUMAN	SWI/SNF-related matrix-associated actin-dependent regulator of chromatin subfamily A containing DEAD/H box 1 OS=Homo sapiens GN=SMARCAD1 PE=1 SV=2	0.1	5	5	117	4.26	0.00848898	0.00848832	0.999975	50	50
924.1	sp	Q9H6T3	RPAP3_HUMAN	RNA polymerase II-associated protein 3 OS=Homo sapiens GN=RPAP3 PE=1 SV=2	0.1	5	4	76	5.95	0.00848898	0.0185735	0.738649	50	40
1008.1	sp	Q9NTJ5	SAC1_HUMAN	Phosphatidylinositide phosphatase SAC1 OS=Homo sapiens GN=SACM1L PE=1 SV=2	0.1	5	2	67	5.23	0.00848898	0.096111	0.24913	50	20
1034.1	sp	Q9NW13	RBM28_HUMAN	RNA-binding protein 28 OS=Homo sapiens GN=RBM28 PE=1 SV=3	0.1	5	1	86	3.5	0.00848898	0.239607	0.0879876	50	10
846.1	sp	Q9NX61	T161A_HUMAN	Transmembrane protein 161A OS=Homo sapiens GN=TMEM161A PE=2 SV=1	0.1	5	7	54	11.2	0.00848898	0.00184293	0.562791	50	70
689.1	sp	Q9UNQ2	DIMT1_HUMAN	Probable dimethyladenosine transferase OS=Homo sapiens GN=DIMT1L PE=1 SV=1	0.1	5	14	35	26.98	0.00848898	1.05811e-05	0.035129	50	140
226.1	sp	P42345	MTOR_HUMAN	Serine/threonine-protein kinase mTOR OS=Homo sapiens GN=MTOR PE=1 SV=1	1	43	63	289	18.53	7.3412e-13	8.33008e-19	0.051366	43	63
1135.1	sp	A1L0T0	ILVBL_HUMAN	Acetolactate synthase-like protein OS=Homo sapiens GN=ILVBL PE=1 SV=2	0.1	4	0.1	68	2.95	0.0185735	1	0.0185735	40	1
293.1	sp	A4QPH2	PI4P2_HUMAN	Putative phosphatidylinositol 4-kinase alpha-like protein P2 OS=Homo sapiens GN=PI4KAP2 PE=5 SV=2	0.1	4	9	67	10.46	0.0185735	0.000413044	0.160083	40	90
1020.1	sp	O14735	CDIPT_HUMAN	CDP-diacylglycerol--inositol 3-phosphatidyltransferase OS=Homo sapiens GN=CDIPT PE=1 SV=1	0.1	4	3	24	14.88	0.0185735	0.0415105	0.70498	40	30
922.1	sp	O14976	GAK_HUMAN	Cyclin-G-associated kinase OS=Homo sapiens GN=GAK PE=1 SV=2	0.1	4	5	143	3.14	0.0185735	0.00848898	0.738649	40	50
862.1	sp	O15047	SET1A_HUMAN	Histone-lysine N-methyltransferase SETD1A OS=Homo sapiens GN=SETD1A PE=1 SV=3	0.1	4	7	186	2.96	0.0185735	0.00184293	0.362685	40	70
423.1	sp	O43896	KIF1C_HUMAN	Kinesin-like protein KIF1C OS=Homo sapiens GN=KIF1C PE=1 SV=3	0.1	4	8	123	4.88	0.0185735	0.000869822	0.243692	40	80
423.1	sp	O60333	KIF1B_HUMAN	Kinesin-like protein KIF1B OS=Homo sapiens GN=KIF1B PE=1 SV=5	0.1	4	14	204	4.4	0.0185735	1.05811e-05	0.0152816	40	140
944.1	sp	O60610	DIAP1_HUMAN	Protein diaphanous homolog 1 OS=Homo sapiens GN=DIAPH1 PE=1 SV=2	0.1	4	4	141	2.83	0.0185735	0.0185735	1	40	40
840.1	sp	O60684	IMA7_HUMAN	Importin subunit alpha-7 OS=Homo sapiens GN=KPNA6 PE=1 SV=1	0.1	4	8	60	10	0.0185735	0.000869822	0.243692	40	80
1043.1	sp	P08195	4F2_HUMAN	4F2 cell-surface antigen heavy chain OS=Homo sapiens GN=SLC3A2 PE=1 SV=3	0.1	4	2	68	4.41	0.0185735	0.096111	0.409734	40	20
610.1	sp	Q13363	CTBP1_HUMAN	C-terminal-binding protein 1 OS=Homo sapiens GN=CTBP1 PE=1 SV=2	0.1	4	7	48	4.21	0.0185735	0.00184279	0.362671	40	70
952.1	sp	Q14257	RCN2_HUMAN	Reticulocalbin-2 OS=Homo sapiens GN=RCN2 PE=1 SV=1	0.1	4	4	37	10.85	0.0185735	0.018575	0.999972	40	40
773.1	sp	Q16637	SMN_HUMAN	Survival motor neuron protein OS=Homo sapiens GN=SMN1 PE=1 SV=1	0.1	4	11	32	23.56	0.0185735	9.44389e-05	0.0653217	40	110
1166.1	sp	Q7KZN9	COX15_HUMAN	Cytochrome c oxidase assembly protein COX15 homolog OS=Homo sapiens GN=COX15 PE=1 SV=1	0.1	4	0.1	46	4.35	0.0185735	1	0.0185735	40	1
293.1	sp	Q8N8J0	PI4P1_HUMAN	Putative phosphatidylinositol 4-kinase alpha-like protein P1 OS=Homo sapiens GN=PI4KAP1 PE=5 SV=1	0.1	4	9	29	24	0.0185735	0.000413044	0.160083	40	90
972.1	sp	Q8NEN9	PDZD8_HUMAN	PDZ domain-containing protein 8 OS=Homo sapiens GN=PDZD8 PE=1 SV=1	0.1	4	4	128	3.11	0.0185735	0.018575	0.999972	40	40
302.1	sp	Q99666	RGPD5_HUMAN	RANBP2-like and GRIP domain-containing protein 5/6 OS=Homo sapiens GN=RGPD5 PE=1 SV=3	0.1	4	0.1	199	1.01	0.0185735	1	0.0185735	40	1
998.1	sp	Q9BV44	THUM3_HUMAN	THUMP domain-containing protein 3 OS=Homo sapiens GN=THUMPD3 PE=1 SV=1	0.1	4	3	57	6.14	0.0185735	0.0415139	0.70495	40	30
1134.1	sp	Q9NR09	BIRC6_HUMAN	Baculoviral IAP repeat-containing protein 6 OS=Homo sapiens GN=BIRC6 PE=1 SV=2	0.1	4	0.1	530	0.38	0.0185735	1	0.0185735	40	1
1144.1	sp	O14497	ARI1A_HUMAN	AT-rich interactive domain-containing protein 1A OS=Homo sapiens GN=ARID1A PE=1 SV=3	0.1	4	0.1	242	0.83	0.018575	1	0.018575	40	1
1044.1	sp	O43156	TTI1_HUMAN	TEL2-interacting protein 1 homolog OS=Homo sapiens GN=TTI1 PE=1 SV=3	0.1	4	2	122	2.46	0.018575	0.096111	0.409754	40	20
784.1	sp	O43396	TXNL1_HUMAN	Thioredoxin-like protein 1 OS=Homo sapiens GN=TXNL1 PE=1 SV=3	0.1	4	10	32	21.72	0.018575	0.000197104	0.103123	40	100
957.1	sp	O60264	SMCA5_HUMAN	SWI/SNF-related matrix-associated actin-dependent regulator of chromatin subfamily A member 5 OS=Homo sapiens GN=SMARCA5 PE=1 SV=1	0.1	4	4	122	3.28	0.018575	0.018575	1	40	40
954.1	sp	P08237	K6PF_HUMAN	6-phosphofructokinase, muscle type OS=Homo sapiens GN=PFKM PE=1 SV=2	0.1	4	4	85	4.7	0.018575	0.018575	1	40	40
816.1	sp	P08243	ASNS_HUMAN	Asparagine synthetase [glutamine-hydrolyzing] OS=Homo sapiens GN=ASNS PE=1 SV=4	0.1	4	9	64	10.1	0.018575	0.000413044	0.160073	40	90
975.1	sp	P09496	CLCA_HUMAN	Clathrin light chain A OS=Homo sapiens GN=CLTA PE=1 SV=1	0.1	4	4	27	14.78	0.018575	0.018575	1	40	40
770.1	sp	P16520	GBB3_HUMAN	Guanine nucleotide-binding protein G(I)/G(S)/G(T) subunit beta-3 OS=Homo sapiens GN=GNB3 PE=1 SV=1	0.1	4	1	37	6.72	0.018575	0.239607	0.165058	40	10
1095.1	sp	P19623	SPEE_HUMAN	Spermidine synthase OS=Homo sapiens GN=SRM PE=1 SV=1	0.1	4	1	34	7.4	0.018575	0.239607	0.165058	40	10
1037.1	sp	P22087	FBRL_HUMAN	rRNA 2'-O-methyltransferase fibrillarin OS=Homo sapiens GN=FBL PE=1 SV=2	0.1	4	2	34	8.89	0.018575	0.0961193	0.409726	40	20
1022.1	sp	P29558	RBMS1_HUMAN	RNA-binding motif, single-stranded-interacting protein 1 OS=Homo sapiens GN=RBMS1 PE=1 SV=3	0.1	4	3	44	7.87	0.018575	0.0415139	0.704976	40	30
976.1	sp	P34741	SDC2_HUMAN	Syndecan-2 OS=Homo sapiens GN=SDC2 PE=1 SV=2	0.1	4	4	22	18.06	0.018575	0.018575	1	40	40
759.1	sp	P43686	PRS6B_HUMAN	26S protease regulatory subunit 6B OS=Homo sapiens GN=PSMC4 PE=1 SV=2	0.1	4	11	47	15.84	0.018575	9.44389e-05	0.0653167	40	110
946.1	sp	P78316	NOP14_HUMAN	Nucleolar protein 14 OS=Homo sapiens GN=NOP14 PE=1 SV=3	0.1	4	4	98	4.1	0.018575	0.0185735	0.999972	40	40
1118.1	sp	Q05655	KPCD_HUMAN	Protein kinase C delta type OS=Homo sapiens GN=PRKCD PE=1 SV=2	0.1	4	1	77	3.23	0.018575	0.239607	0.165058	40	10
917.1	sp	Q12972	PP1R8_HUMAN	Nuclear inhibitor of protein phosphatase 1 OS=Homo sapiens GN=PPP1R8 PE=1 SV=2	0.1	4	5	38	11.7	0.018575	0.00848898	0.738623	40	50
807.1	sp	Q13098	CSN1_HUMAN	COP9 signalosome complex subunit 1 OS=Homo sapiens GN=GPS1 PE=1 SV=4	0.1	4	9	56	11.71	0.018575	0.000413044	0.160073	40	90
964.1	sp	Q14004	CDK13_HUMAN	Cyclin-dependent kinase 13 OS=Homo sapiens GN=CDK13 PE=1 SV=2	0.1	4	4	165	2.43	0.018575	0.018575	1	40	40
1075.1	sp	Q14684	RRP1B_HUMAN	Ribosomal RNA processing protein 1 homolog B OS=Homo sapiens GN=RRP1B PE=1 SV=3	0.1	4	1	84	2.96	0.018575	0.239607	0.165058	40	10
1042.1	sp	Q49A26	GLYR1_HUMAN	Putative oxidoreductase GLYR1 OS=Homo sapiens GN=GLYR1 PE=1 SV=3	0.1	4	2	61	4.96	0.018575	0.096111	0.409754	40	20
502.2	sp	Q5VTR2	BRE1A_HUMAN	E3 ubiquitin-protein ligase BRE1A OS=Homo sapiens GN=RNF20 PE=1 SV=2	0.1	4	2	114	2.64	0.018575	0.096111	0.409754	40	20
1022.1	sp	Q6XE24	RBMS3_HUMAN	RNA-binding motif, single-stranded-interacting protein 3 OS=Homo sapiens GN=RBMS3 PE=1 SV=1	0.1	4	3	48	7.32	0.018575	0.0415139	0.704976	40	30
857.1	sp	Q86UV5	UBP48_HUMAN	Ubiquitin carboxyl-terminal hydrolase 48 OS=Homo sapiens GN=USP48 PE=1 SV=1	0.1	4	7	119	4.62	0.018575	0.00184293	0.362666	40	70
1016.1	sp	Q8NB90	SPAT5_HUMAN	Spermatogenesis-associated protein 5 OS=Homo sapiens GN=SPATA5 PE=1 SV=3	0.1	4	3	98	3.58	0.018575	0.0415105	0.705006	40	30
1101.1	sp	Q8NCA5	FA98A_HUMAN	Protein FAM98A OS=Homo sapiens GN=FAM98A PE=1 SV=1	0.1	4	3	55	4.52	0.018575	0.0415105	0.705006	40	30
992.1	sp	Q96DT7	ZBT10_HUMAN	Zinc finger and BTB domain-containing protein 10 OS=Homo sapiens GN=ZBTB10 PE=1 SV=2	0.1	4	3	95	3.69	0.018575	0.0415105	0.705006	40	30
500.1	sp	Q99733	NP1L4_HUMAN	Nucleosome assembly protein 1-like 4 OS=Homo sapiens GN=NAP1L4 PE=1 SV=1	0.1	4	4	43	9.35	0.018575	0.018575	1	40	40
1024.1	sp	Q9BY32	ITPA_HUMAN	Inosine triphosphate pyrophosphatase OS=Homo sapiens GN=ITPA PE=1 SV=2	0.1	4	3	21	16.33	0.018575	0.0415139	0.704976	40	30
1127.1	sp	Q9BZF1	OSBL8_HUMAN	Oxysterol-binding protein-related protein 8 OS=Homo sapiens GN=OSBPL8 PE=1 SV=3	0.1	4	1	101	2.47	0.018575	0.239607	0.165058	40	10
942.1	sp	Q9H7E9	CH033_HUMAN	UPF0488 protein C8orf33 OS=Homo sapiens GN=C8orf33 PE=1 SV=1	0.1	4	5	25	18.02	0.018575	0.00848898	0.738623	40	50
1056.1	sp	Q9NP77	SSU72_HUMAN	RNA polymerase II subunit A C-terminal domain phosphatase SSU72 OS=Homo sapiens GN=SSU72 PE=1 SV=1	0.1	4	2	23	13.3	0.018575	0.0961193	0.409726	40	20
1142.1	sp	Q9NV70	EXOC1_HUMAN	Exocyst complex component 1 OS=Homo sapiens GN=EXOC1 PE=1 SV=4	0.1	4	0.1	102	1.96	0.018575	1	0.018575	40	1
921.1	sp	Q9NXW2	DJB12_HUMAN	DnaJ homolog subfamily B member 12 OS=Homo sapiens GN=DNAJB12 PE=1 SV=4	0.1	4	5	42	10.77	0.018575	0.00848898	0.738623	40	50
827.1	sp	Q9UNM6	PSD13_HUMAN	26S proteasome non-ATPase regulatory subunit 13 OS=Homo sapiens GN=PSMD13 PE=1 SV=2	0.1	4	8	43	13.98	0.018575	0.000869822	0.243678	40	80
1113.1	sp	Q9Y679	AUP1_HUMAN	Ancient ubiquitous protein 1 OS=Homo sapiens GN=AUP1 PE=1 SV=1	0.1	4	1	53	4.72	0.018575	0.239607	0.165058	40	10
327.1	sp	Q9BXS5	AP1M1_HUMAN	AP-1 complex subunit mu-1 OS=Homo sapiens GN=AP1M1 PE=1 SV=3	1	35	29	49	66.93	1.71503e-10	1.0112e-08	0.452923	35	29
333.1	sp	Q9Y450	HBS1L_HUMAN	HBS1-like protein OS=Homo sapiens GN=HBS1L PE=1 SV=1	1	35	28	75	42.43	1.71503e-10	1.99205e-08	0.377329	35	28
344.1	sp	O75717	WDHD1_HUMAN	WD repeat and HMG-box DNA-binding protein 1 OS=Homo sapiens GN=WDHD1 PE=1 SV=1	1	34	26	126	24.23	3.38663e-10	7.71927e-08	0.300979	34	26
365.1	sp	Q92878	RAD50_HUMAN	DNA repair protein RAD50 OS=Homo sapiens GN=RAD50 PE=1 SV=1	1	34	22	154	18.53	3.38663e-10	1.15101e-06	0.10744	34	22
53.1	sp	Q93008	USP9X_HUMAN	Probable ubiquitin carboxyl-terminal hydrolase FAF-X OS=Homo sapiens GN=USP9X PE=1 SV=3	6	196	188	292	66.76	4.41359e-51	9.04569e-49	0.683081	32.6667	31.3333
191.1	sp	P11172	UMPS_HUMAN	Uridine 5'-monophosphate synthase OS=Homo sapiens GN=UMPS PE=1 SV=1	2	63	62	52	121.67	1.89941e-17	3.71432e-17	0.92873	31.5	31
160.1	sp	A5YKK6	CNOT1_HUMAN	CCR4-NOT transcription complex subunit 1 OS=Homo sapiens GN=CNOT1 PE=1 SV=2	2	61	90	267	28.68	7.26289e-17	2.34822e-25	0.0179166	30.5	45
927.1	sp	O15027	SC16A_HUMAN	Protein transport protein Sec16A OS=Homo sapiens GN=SEC16A PE=1 SV=3	0.1	3	6	233	1.93	0.0415105	0.00393511	0.312682	30	60
1217.1	sp	O60287	NPA1P_HUMAN	Nucleolar pre-ribosomal-associated protein 1 OS=Homo sapiens GN=URB1 PE=1 SV=4	0.1	3	0.1	254	0.59	0.0415105	1	0.0415105	30	1
1141.1	sp	O75127	PTCD1_HUMAN	Pentatricopeptide repeat-containing protein 1 OS=Homo sapiens GN=PTCD1 PE=1 SV=2	0.1	3	1	79	2.54	0.0415105	0.239607	0.306329	30	10
989.1	sp	O75155	CAND2_HUMAN	Cullin-associated NEDD8-dissociated protein 2 OS=Homo sapiens GN=CAND2 PE=1 SV=3	0.1	3	4	135	2.59	0.0415105	0.0185735	0.70498	30	40
885.1	sp	O75792	RNH2A_HUMAN	Ribonuclease H2 subunit A OS=Homo sapiens GN=RNASEH2A PE=1 SV=2	0.1	3	7	33	14.98	0.0415105	0.00184293	0.199565	30	70
815.1	sp	P16152	CBR1_HUMAN	Carbonyl reductase [NADPH] 1 OS=Homo sapiens GN=CBR1 PE=1 SV=3	0.1	3	10	30	21.41	0.0415105	0.000197104	0.0461431	30	100
1184.1	sp	P19525	E2AK2_HUMAN	Interferon-induced, double-stranded RNA-activated protein kinase OS=Homo sapiens GN=EIF2AK2 PE=1 SV=2	0.1	3	1	62	3.22	0.0415105	0.239607	0.306329	30	10
993.1	sp	P26639	SYTC_HUMAN	Threonyl-tRNA synthetase, cytoplasmic OS=Homo sapiens GN=TARS PE=1 SV=3	0.1	3	4	83	4.2	0.0415105	0.0185735	0.70498	30	40
894.1	sp	P41743	KPCI_HUMAN	Protein kinase C iota type OS=Homo sapiens GN=PRKCI PE=1 SV=2	0.1	3	7	68	7.33	0.0415105	0.00184293	0.199565	30	70
794.1	sp	P43487	RANG_HUMAN	Ran-specific GTPase-activating protein OS=Homo sapiens GN=RANBP1 PE=1 SV=1	0.1	3	11	23	30.05	0.0415105	9.44389e-05	0.0274909	30	110
1079.1	sp	P54619	AAKG1_HUMAN	5'-AMP-activated protein kinase subunit gamma-1 OS=Homo sapiens GN=PRKAG1 PE=1 SV=1	0.1	3	2	38	6.66	0.0415105	0.0961193	0.6536	30	20
1219.1	sp	Q12955	ANK3_HUMAN	Ankyrin-3 OS=Homo sapiens GN=ANK3 PE=1 SV=3	0.1	3	0.1	480	0.31	0.0415105	1	0.0415105	30	1
1196.1	sp	Q13395	TARB1_HUMAN	Probable methyltransferase TARBP1 OS=Homo sapiens GN=TARBP1 PE=1 SV=1	0.1	3	0.1	182	0.83	0.0415105	1	0.0415105	30	1
955.1	sp	Q13418	ILK_HUMAN	Integrin-linked protein kinase OS=Homo sapiens GN=ILK PE=1 SV=2	0.1	3	5	51	7.78	0.0415105	0.00848832	0.477167	30	50
1036.1	sp	Q16527	CSRP2_HUMAN	Cysteine and glycine-rich protein 2 OS=Homo sapiens GN=CSRP2 PE=1 SV=3	0.1	3	3	21	14.33	0.0415105	0.0415139	0.999967	30	30
1069.1	sp	Q5VIR6	VPS53_HUMAN	Vacuolar protein sorting-associated protein 53 homolog OS=Homo sapiens GN=VPS53 PE=1 SV=1	0.1	3	3	80	3.77	0.0415105	0.0415105	1	30	30
999.1	sp	Q5VUA4	ZN318_HUMAN	Zinc finger protein 318 OS=Homo sapiens GN=ZNF318 PE=1 SV=2	0.1	3	4	251	1.39	0.0415105	0.0185735	0.70498	30	40
932.1	sp	Q6P996	PDXD1_HUMAN	Pyridoxal-dependent decarboxylase domain-containing protein 1 OS=Homo sapiens GN=PDXDC1 PE=1 SV=2	0.1	3	6	87	5.19	0.0415105	0.00393511	0.312682	30	60
968.1	sp	Q6UWP7	LCLT1_HUMAN	Lysocardiolipin acyltransferase 1 OS=Homo sapiens GN=LCLAT1 PE=1 SV=1	0.1	3	5	49	8.18	0.0415105	0.00848898	0.477187	30	50
806.1	sp	Q6W2J9	BCOR_HUMAN	BCL-6 corepressor OS=Homo sapiens GN=BCOR PE=1 SV=1	0.1	3	10	192	3.38	0.0415105	0.000197104	0.0461431	30	100
860.1	sp	Q86XI2	CNDG2_HUMAN	Condensin-2 complex subunit G2 OS=Homo sapiens GN=NCAPG2 PE=1 SV=1	0.1	3	8	131	4.2	0.0415105	0.000869757	0.124623	30	80
1033.1	sp	Q8N1F8	S11IP_HUMAN	Serine/threonine-protein kinase 11-interacting protein OS=Homo sapiens GN=STK11IP PE=1 SV=3	0.1	3	3	121	2.47	0.0415105	0.0415105	1	30	30
1106.1	sp	Q8ND82	Z280C_HUMAN	Zinc finger protein 280C OS=Homo sapiens GN=ZNF280C PE=1 SV=1	0.1	3	2	83	3.01	0.0415105	0.0961193	0.6536	30	20
800.1	sp	Q96AY4	TTC28_HUMAN	Tetratricopeptide repeat protein 28 OS=Homo sapiens GN=TTC28 PE=1 SV=4	0.1	3	10	271	2.4	0.0415105	0.000197104	0.0461431	30	100
1088.1	sp	Q96CU9	FXRD1_HUMAN	FAD-dependent oxidoreductase domain-containing protein 1 OS=Homo sapiens GN=FOXRED1 PE=1 SV=2	0.1	3	2	54	4.65	0.0415105	0.096111	0.653636	30	20
861.1	sp	Q96P70	IPO9_HUMAN	Importin-9 OS=Homo sapiens GN=IPO9 PE=1 SV=3	0.1	3	8	116	4.75	0.0415105	0.000869822	0.124629	30	80
1139.1	sp	Q99700	ATX2_HUMAN	Ataxin-2 OS=Homo sapiens GN=ATXN2 PE=1 SV=2	0.1	3	1	140	1.43	0.0415105	0.239607	0.306329	30	10
892.1	sp	Q9BSJ2	GCP2_HUMAN	Gamma-tubulin complex component 2 OS=Homo sapiens GN=TUBGCP2 PE=1 SV=2	0.1	3	7	102	4.88	0.0415105	0.00184293	0.199565	30	70
1243.1	sp	Q9BWH6	RPAP1_HUMAN	RNA polymerase II-associated protein 1 OS=Homo sapiens GN=RPAP1 PE=1 SV=3	0.1	3	0.1	153	0.98	0.0415105	1	0.0415105	30	1
1200.1	sp	Q9BXW9	FACD2_HUMAN	Fanconi anemia group D2 protein OS=Homo sapiens GN=FANCD2 PE=1 SV=1	0.1	3	0.1	166	0.9	0.0415105	1	0.0415105	30	1
808.1	sp	Q9BYN8	RT26_HUMAN	28S ribosomal protein S26, mitochondrial OS=Homo sapiens GN=MRPS26 PE=1 SV=1	0.1	3	10	24	26.86	0.0415105	0.000197104	0.0461431	30	100
863.1	sp	Q9H1A4	APC1_HUMAN	Anaphase-promoting complex subunit 1 OS=Homo sapiens GN=ANAPC1 PE=1 SV=1	0.1	3	8	216	2.54	0.0415105	0.000869822	0.124629	30	80
1193.1	sp	Q9NR12	PDLI7_HUMAN	PDZ and LIM domain protein 7 OS=Homo sapiens GN=PDLIM7 PE=1 SV=1	0.1	3	1	50	4.01	0.0415105	0.239607	0.306329	30	10
211.2	sp	Q9NRF8	PYRG2_HUMAN	CTP synthase 2 OS=Homo sapiens GN=CTPS2 PE=1 SV=1	0.1	3	6	66	2.29	0.0415105	0.00393511	0.312682	30	60
1267.1	sp	Q9NVV4	PAPD1_HUMAN	Poly(A) RNA polymerase, mitochondrial OS=Homo sapiens GN=MTPAP PE=1 SV=1	0.1	3	0.1	66	2.27	0.0415105	1	0.0415105	30	1
1213.1	sp	Q9P0J7	KCMF1_HUMAN	E3 ubiquitin-protein ligase KCMF1 OS=Homo sapiens GN=KCMF1 PE=1 SV=2	0.1	3	0.1	42	3.58	0.0415105	1	0.0415105	30	1
1081.1	sp	Q9UBN7	HDAC6_HUMAN	Histone deacetylase 6 OS=Homo sapiens GN=HDAC6 PE=1 SV=2	0.1	3	2	131	1.9	0.0415105	0.0961193	0.6536	30	20
831.1	sp	Q9UGI8	TES_HUMAN	Testin OS=Homo sapiens GN=TES PE=1 SV=1	0.1	3	9	48	12.51	0.0415105	0.000413044	0.0764242	30	90
1089.1	sp	Q9UJC3	HOOK1_HUMAN	Protein Hook homolog 1 OS=Homo sapiens GN=HOOK1 PE=1 SV=2	0.1	3	2	85	2.96	0.0415105	0.096111	0.653636	30	20
1272.1	sp	Q9UKX7	NUP50_HUMAN	Nuclear pore complex protein Nup50 OS=Homo sapiens GN=NUP50 PE=1 SV=2	0.1	3	0.1	50	2.99	0.0415105	1	0.0415105	30	1
1061.1	sp	Q9UPW5	CBPC1_HUMAN	Cytosolic carboxypeptidase 1 OS=Homo sapiens GN=AGTPBP1 PE=1 SV=3	0.1	3	3	138	2.17	0.0415105	0.0415105	1	30	30
1070.1	sp	Q9Y2R5	RT17_HUMAN	28S ribosomal protein S17, mitochondrial OS=Homo sapiens GN=MRPS17 PE=1 SV=1	0.1	3	3	14	20.7	0.0415105	0.0415105	1	30	30
778.1	sp	Q9Y3S1	WNK2_HUMAN	Serine/threonine-protein kinase WNK2 OS=Homo sapiens GN=WNK2 PE=1 SV=4	0.1	3	1	243	0.82	0.0415105	0.239607	0.306329	30	10
1047.1	sp	O14578	CTRO_HUMAN	Citron Rho-interacting kinase OS=Homo sapiens GN=CIT PE=1 SV=2	0.1	3	3	231	1.3	0.0415139	0.0415139	1	30	30
1197.1	sp	O15111	IKKA_HUMAN	Inhibitor of nuclear factor kappa-B kinase subunit alpha OS=Homo sapiens GN=CHUK PE=1 SV=2	0.1	3	0.1	85	1.77	0.0415139	1	0.0415139	30	1
856.1	sp	O15397	IPO8_HUMAN	Importin-8 OS=Homo sapiens GN=IPO8 PE=1 SV=2	0.1	3	8	120	4.59	0.0415139	0.000869822	0.124619	30	80
1137.1	sp	O75165	DJC13_HUMAN	DnaJ homolog subfamily C member 13 OS=Homo sapiens GN=DNAJC13 PE=1 SV=5	0.1	3	1	254	0.79	0.0415139	0.239607	0.306347	30	10
1102.1	sp	O75190	DNJB6_HUMAN	DnaJ homolog subfamily B member 6 OS=Homo sapiens GN=DNAJB6 PE=1 SV=2	0.1	3	2	36	6.93	0.0415139	0.096111	0.653665	30	20
1092.1	sp	P10398	ARAF_HUMAN	Serine/threonine-protein kinase A-Raf OS=Homo sapiens GN=ARAF PE=1 SV=2	0.1	3	2	68	3.7	0.0415139	0.0961193	0.653629	30	20
899.1	sp	P37108	SRP14_HUMAN	Signal recognition particle 14 kDa protein OS=Homo sapiens GN=SRP14 PE=1 SV=2	0.1	3	7	15	34.34	0.0415139	0.00184293	0.199551	30	70
803.1	sp	P53992	SC24C_HUMAN	Protein transport protein Sec24C OS=Homo sapiens GN=SEC24C PE=1 SV=3	0.1	3	10	118	5.5	0.0415139	0.000197104	0.0461388	30	100
911.1	sp	Q00796	DHSO_HUMAN	Sorbitol dehydrogenase OS=Homo sapiens GN=SORD PE=1 SV=4	0.1	3	6	38	11.75	0.0415139	0.00393511	0.312663	30	60
1012.1	sp	Q08752	PPID_HUMAN	Peptidyl-prolyl cis-trans isomerase D OS=Homo sapiens GN=PPID PE=1 SV=3	0.1	3	4	41	8.59	0.0415139	0.018575	0.704976	30	40
441.1	sp	Q13733	AT1A4_HUMAN	Sodium/potassium-transporting ATPase subunit alpha-4 OS=Homo sapiens GN=ATP1A4 PE=1 SV=3	0.1	3	0.1	114	1.31	0.0415139	1	0.0415139	30	1
1063.1	sp	Q15054	DPOD3_HUMAN	DNA polymerase delta subunit 3 OS=Homo sapiens GN=POLD3 PE=1 SV=2	0.1	3	3	51	5.84	0.0415139	0.0415139	1	30	30
903.1	sp	Q5TAP6	UT14C_HUMAN	U3 small nucleolar RNA-associated protein 14 homolog C OS=Homo sapiens GN=UTP14C PE=1 SV=1	0.1	3	2	87	3.44	0.0415139	0.096111	0.653665	30	20
881.1	sp	Q7Z3K3	POGZ_HUMAN	Pogo transposable element with ZNF domain OS=Homo sapiens GN=POGZ PE=1 SV=2	0.1	3	7	155	3.22	0.0415139	0.00184279	0.199542	30	70
1247.1	sp	Q8NAT1	AGO61_HUMAN	Uncharacterized glycosyltransferase AGO61 OS=Homo sapiens GN=AGO61 PE=2 SV=1	0.1	3	0.1	67	2.25	0.0415139	1	0.0415139	30	1
1159.1	sp	Q8ND24	RN214_HUMAN	RING finger protein 214 OS=Homo sapiens GN=RNF214 PE=1 SV=2	0.1	3	1	78	2.58	0.0415139	0.239607	0.306347	30	10
967.1	sp	Q8NFH4	NUP37_HUMAN	Nucleoporin Nup37 OS=Homo sapiens GN=NUP37 PE=1 SV=1	0.1	3	5	37	10.9	0.0415139	0.00848898	0.477162	30	50
1028.1	sp	Q8TCG1	CIP2A_HUMAN	Protein CIP2A OS=Homo sapiens GN=KIAA1524 PE=1 SV=2	0.1	3	3	102	2.94	0.0415139	0.0415105	0.999967	30	30
1102.1	sp	Q8WWF6	DNJB3_HUMAN	DnaJ homolog subfamily B member 3 OS=Homo sapiens GN=DNAJB3 PE=1 SV=1	0.1	3	1	17	12.09	0.0415139	0.239607	0.306347	30	10
1105.1	sp	Q92785	REQU_HUMAN	Zinc finger protein ubi-d4 OS=Homo sapiens GN=DPF2 PE=1 SV=2	0.1	3	2	44	5.67	0.0415139	0.0961193	0.653629	30	20
313.1	sp	Q92995	UBP13_HUMAN	Ubiquitin carboxyl-terminal hydrolase 13 OS=Homo sapiens GN=USP13 PE=1 SV=2	0.1	3	4	97	3.6	0.0415139	0.018575	0.704976	30	40
1098.1	sp	Q96BN8	F105B_HUMAN	Protein FAM105B OS=Homo sapiens GN=FAM105B PE=1 SV=3	0.1	3	2	40	6.21	0.0415139	0.0961193	0.653629	30	20
995.1	sp	Q96FZ2	CC037_HUMAN	UPF0361 protein C3orf37 OS=Homo sapiens GN=C3orf37 PE=1 SV=1	0.1	3	4	41	8.63	0.0415139	0.018575	0.704976	30	40
1094.1	sp	Q96RE7	NACC1_HUMAN	Nucleus accumbens-associated protein 1 OS=Homo sapiens GN=NACC1 PE=1 SV=1	0.1	3	2	57	4.37	0.0415139	0.0961193	0.653629	30	20
767.1	sp	Q96S55	WRIP1_HUMAN	ATPase WRNIP1 OS=Homo sapiens GN=WRNIP1 PE=1 SV=2	0.1	3	12	72	10.4	0.0415139	4.54026e-05	0.016188	30	120
836.1	sp	Q99956	DUS9_HUMAN	Dual specificity protein phosphatase 9 OS=Homo sapiens GN=DUSP9 PE=1 SV=1	0.1	3	9	42	14.34	0.0415139	0.000413044	0.0764178	30	90
895.1	sp	Q9H4I3	TRABD_HUMAN	TraB domain-containing protein OS=Homo sapiens GN=TRABD PE=2 SV=1	0.1	3	7	42	11.82	0.0415139	0.00184293	0.199551	30	70
883.1	sp	Q9H9Y6	RPA2_HUMAN	DNA-directed RNA polymerase I subunit RPA2 OS=Homo sapiens GN=POLR1B PE=1 SV=2	0.1	3	7	128	3.9	0.0415139	0.00184293	0.199551	30	70
1046.1	sp	Q9NRY4	RHG35_HUMAN	Rho GTPase-activating protein 35 OS=Homo sapiens GN=ARHGAP35 PE=1 SV=2	0.1	3	3	172	1.74	0.0415139	0.0415105	0.999967	30	30
1009.1	sp	Q9NVE7	PANK4_HUMAN	Pantothenate kinase 4 OS=Homo sapiens GN=PANK4 PE=1 SV=1	0.1	3	4	86	4.07	0.0415139	0.018575	0.704976	30	40
1162.1	sp	Q9P260	K1468_HUMAN	LisH domain and HEAT repeat-containing protein KIAA1468 OS=Homo sapiens GN=KIAA1468 PE=1 SV=2	0.1	3	1	135	1.49	0.0415139	0.239607	0.306347	30	10
1050.1	sp	Q9ULX6	AKP8L_HUMAN	A-kinase anchor protein 8-like OS=Homo sapiens GN=AKAP8L PE=1 SV=3	0.1	3	3	72	4.19	0.0415139	0.0415139	1	30	30
118.1	sp	P55196	AFAD_HUMAN	Afadin OS=Homo sapiens GN=MLLT4 PE=1 SV=3	3	88	111	207	48.87	1.70408e-23	3.53882e-30	0.102627	29.3333	37
312.1	sp	Q13616	CUL1_HUMAN	Cullin-1 OS=Homo sapiens GN=CUL1 PE=1 SV=2	1	29	38	90	37.94	1.0112e-08	2.22314e-11	0.270814	29	38
424.1	sp	Q08945	SSRP1_HUMAN	FACT complex subunit SSRP1 OS=Homo sapiens GN=SSRP1 PE=1 SV=1	1	28	18	81	29	1.99205e-08	1.69562e-05	0.138786	28	18
299.1	sp	Q02878	RL6_HUMAN	60S ribosomal protein L6 OS=Homo sapiens GN=RPL6 PE=1 SV=3	1	27	47	33	114.65	3.92239e-08	4.77567e-14	0.0193101	27	47
354.1	sp	Q15020	SART3_HUMAN	Squamous cell carcinoma antigen recognized by T-cells 3 OS=Homo sapiens GN=SART3 PE=1 SV=1	1	27	31	110	26.85	3.92239e-08	2.60212e-09	0.599281	27	31
436.1	sp	Q9H583	HEAT1_HUMAN	HEAT repeat-containing protein 1 OS=Homo sapiens GN=HEATR1 PE=1 SV=3	1	27	16	242	9.08	3.92239e-08	6.46896e-05	0.0916314	27	16
237.1	sp	O14617	AP3D1_HUMAN	AP-3 complex subunit delta-1 OS=Homo sapiens GN=AP3D1 PE=1 SV=1	2	52	48	130	39.21	2.97484e-14	4.25933e-13	0.689117	26	24
426.1	sp	O15381	NVL_HUMAN	Nuclear valosin-containing protein-like OS=Homo sapiens GN=NVL PE=1 SV=1	1	26	20	95	24.74	7.71927e-08	4.42562e-06	0.375664	26	20
412.1	sp	O95782	AP2A1_HUMAN	AP-2 complex subunit alpha-1 OS=Homo sapiens GN=AP2A1 PE=1 SV=3	1	25	22	107	22.33	1.51831e-07	1.15101e-06	0.661572	25	22
429.1	sp	P52789	HXK2_HUMAN	Hexokinase-2 OS=Homo sapiens GN=HK2 PE=1 SV=2	1	25	20	102	22.48	1.51831e-07	4.42562e-06	0.455591	25	20
236.1	sp	P46459	NSF_HUMAN	Vesicle-fusing ATPase OS=Homo sapiens GN=NSF PE=1 SV=3	2	48	52	83	61.79	4.25933e-13	2.97484e-14	0.689117	24	26
395.1	sp	Q99615	DNJC7_HUMAN	DnaJ homolog subfamily C member 7 OS=Homo sapiens GN=DNAJC7 PE=1 SV=2	1	24	25	56	44.32	2.9846e-07	1.51831e-07	0.886399	24	25
157.1	sp	P54136	SYRC_HUMAN	Arginyl-tRNA synthetase, cytoplasmic OS=Homo sapiens GN=RARS PE=1 SV=2	3	71	81	75	102.88	1.3432e-18	1.79095e-21	0.417136	23.6667	27
178.1	sp	Q8TEX9	IPO4_HUMAN	Importin-4 OS=Homo sapiens GN=IPO4 PE=1 SV=2	3	70	62	119	56.89	2.59816e-18	5.00318e-16	0.486101	23.3333	20.6667
417.1	sp	P48444	COPD_HUMAN	Coatomer subunit delta OS=Homo sapiens GN=ARCN1 PE=1 SV=1	1	22	25	57	41.98	1.15101e-06	1.51831e-07	0.661572	22	25
468.1	sp	Q96KR1	ZFR_HUMAN	Zinc finger RNA-binding protein OS=Homo sapiens GN=ZFR PE=1 SV=2	1	22	16	117	16.68	1.15101e-06	6.46896e-05	0.329377	22	16
484.1	sp	Q9BQ67	GRWD1_HUMAN	Glutamate-rich WD repeat-containing protein 1 OS=Homo sapiens GN=GRWD1 PE=1 SV=1	1	22	14	49	37.46	1.15101e-06	0.000245515	0.180597	22	14
280.1	sp	P53007	TXTP_HUMAN	Tricarboxylate transport protein, mitochondrial OS=Homo sapiens GN=SLC25A1 PE=1 SV=2	2	42	41	34	125.03	2.26788e-11	4.38845e-11	0.912595	21	20.5
529.1	sp	Q9Y520	PRC2C_HUMAN	Protein PRRC2C OS=Homo sapiens GN=PRRC2C PE=1 SV=4	1	20	10	317	4.89	4.42562e-06	0.00346111	0.0652763	20	10
294.1	sp	O95163	ELP1_HUMAN	Elongator complex protein 1 OS=Homo sapiens GN=IKBKAP PE=1 SV=3	2	38	36	150	25.31	3.16493e-10	1.17637e-09	0.816142	19	18
486.1	sp	Q9H0S4	DDX47_HUMAN	Probable ATP-dependent RNA helicase DDX47 OS=Homo sapiens GN=DDX47 PE=1 SV=1	1	19	16	51	35.56	8.66684e-06	6.46896e-05	0.611871	19	16
43.1	sp	Q14008	CKAP5_HUMAN	Cytoskeleton-associated protein 5 OS=Homo sapiens GN=CKAP5 PE=1 SV=3	11	203	261	225	105.39	1.4124e-47	6.26811e-64	0.00701549	18.4545	23.7273
324.1	sp	Q5H9R7	PP6R3_HUMAN	Serine/threonine-protein phosphatase 6 regulatory subunit 3 OS=Homo sapiens GN=PPP6R3 PE=1 SV=2	2	36	28	98	33.81	1.1761e-09	2.15033e-07	0.316677	18	14
412.1	sp	O94973	AP2A2_HUMAN	AP-2 complex subunit alpha-2 OS=Homo sapiens GN=AP2A2 PE=1 SV=2	1	18	20	104	18.77	1.69562e-05	4.42562e-06	0.745546	18	20
459.1	sp	Q96FW1	OTUB1_HUMAN	Ubiquitin thioesterase OTUB1 OS=Homo sapiens GN=OTUB1 PE=1 SV=2	1	18	22	31	65.57	1.69562e-05	1.15101e-06	0.526744	18	22
156.1	sp	Q8N1F7	NUP93_HUMAN	Nuclear pore complex protein Nup93 OS=Homo sapiens GN=NUP93 PE=1 SV=2	4	71	80	93	82.95	1.47924e-17	4.2811e-20	0.463786	17.75	20
88.1	sp	Q14204	DYHC1_HUMAN	Cytoplasmic dynein 1 heavy chain 1 OS=Homo sapiens GN=DYNC1H1 PE=1 SV=5	9	158	100	532	25.09	5.50849e-37	3.99638e-21	0.000287386	17.5556	11.1111
77.1	sp	Q5VYK3	ECM29_HUMAN	Proteasome-associated protein ECM29 homolog OS=Homo sapiens GN=ECM29 PE=1 SV=2	7	122	157	204	70.04	6.80271e-29	9.51415e-39	0.0358911	17.4286	22.4286
298.1	sp	Q14671	PUM1_HUMAN	Pumilio homolog 1 OS=Homo sapiens GN=PUM1 PE=1 SV=3	2	34	39	126	29.67	4.35572e-09	1.63946e-10	0.558255	17	19.5
502.1	sp	O75150	BRE1B_HUMAN	E3 ubiquitin-protein ligase BRE1B OS=Homo sapiens GN=RNF40 PE=1 SV=4	1	17	16	114	14.97	3.31387e-05	6.46896e-05	0.861794	17	16
460.1	sp	P24666	PPAC_HUMAN	Low molecular weight phosphotyrosine protein phosphatase OS=Homo sapiens GN=ACP1 PE=1 SV=3	1	17	23	18	113.69	3.31387e-05	5.86319e-07	0.34187	17	23
222.1	sp	P28340	DPOD1_HUMAN	DNA polymerase delta catalytic subunit OS=Homo sapiens GN=POLD1 PE=1 SV=2	3	50	55	124	43.71	1.24364e-12	4.84543e-14	0.62552	16.6667	18.3333
429.1	sp	P19367	HXK1_HUMAN	Hexokinase-1 OS=Homo sapiens GN=HK1 PE=1 SV=3	1	16	9	102	12.69	6.46896e-05	0.00666551	0.158713	16	9
546.1	sp	P42695	CNDD3_HUMAN	Condensin-2 complex subunit D3 OS=Homo sapiens GN=NCAPD3 PE=1 SV=2	1	16	12	169	8.59	6.46896e-05	0.000925723	0.448916	16	12
473.1	sp	Q5VZL5	ZMYM4_HUMAN	Zinc finger MYM-type protein 4 OS=Homo sapiens GN=ZMYM4 PE=1 SV=1	1	16	21	173	11	6.46896e-05	2.25789e-06	0.410364	16	21
158.1	sp	P30153	2AAA_HUMAN	Serine/threonine-protein phosphatase 2A 65 kDa regulatory subunit A alpha isoform OS=Homo sapiens GN=PPP2R1A PE=1 SV=4	5	78	71	65	117.98	1.48673e-18	1.28052e-16	0.56626	15.6	14.2
531.1	sp	O94826	TOM70_HUMAN	Mitochondrial import receptor subunit TOM70 OS=Homo sapiens GN=TOMM70A PE=1 SV=1	1	15	15	67	22.99	0.000126116	0.000126116	1	15	15
626.1	sp	Q7Z478	DHX29_HUMAN	ATP-dependent RNA helicase DHX29 OS=Homo sapiens GN=DHX29 PE=1 SV=2	1	15	7	155	7.41	0.000126116	0.0244595	0.0844632	15	7
684.1	sp	Q8IWI9	MGAP_HUMAN	MAX gene-associated protein OS=Homo sapiens GN=MGA PE=1 SV=2	1	15	3	332	2.86	0.000126116	0.306347	0.00312486	15	3
124.2	sp	Q9Y678	COPG_HUMAN	Coatomer subunit gamma OS=Homo sapiens GN=COPG PE=1 SV=1	6	85	87	98	91.14	1.41122e-19	3.97861e-20	0.878792	14.1667	14.5
475.1	sp	P62191	PRS4_HUMAN	26S protease regulatory subunit 4 OS=Homo sapiens GN=PSMC1 PE=1 SV=1	1	14	23	49	38.65	0.000245515	5.86319e-07	0.137003	14	23
556.1	sp	Q9UKN8	TF3C4_HUMAN	General transcription factor 3C polypeptide 4 OS=Homo sapiens GN=GTF3C4 PE=1 SV=2	1	14	13	92	15.23	0.000245515	0.000477176	0.847372	14	13
339.1	sp	Q9UBE0	SAE1_HUMAN	SUMO-activating enzyme subunit 1 OS=Homo sapiens GN=SAE1 PE=1 SV=1	2	27	34	38	81.97	4.09899e-07	4.35473e-09	0.369587	13.5	17
349.1	sp	Q15185	TEBP_HUMAN	Prostaglandin E synthase 3 OS=Homo sapiens GN=PTGES3 PE=1 SV=1	2	27	32	19	163.22	4.09983e-07	1.60592e-08	0.51483	13.5	16
9.1	sp	P78527	PRKDC_HUMAN	DNA-dependent protein kinase catalytic subunit OS=Homo sapiens GN=PRKDC PE=1 SV=3	91	1218	1031	469	249.58	6.38337e-253	6.49465e-203	7.96469e-05	13.3846	11.3297
124.1	sp	Q9UBF2	COPG2_HUMAN	Coatomer subunit gamma-2 OS=Homo sapiens GN=COPG2 PE=1 SV=1	7	92	95	98	99.43	1.28796e-20	1.95856e-21	0.826349	13.1429	13.5714
418.1	sp	P82673	RT35_HUMAN	28S ribosomal protein S35, mitochondrial OS=Homo sapiens GN=MRPS35 PE=1 SV=1	1	13	34	37	65.18	0.000477176	3.38663e-10	0.0018196	13	34
422.1	sp	P35573	GDE_HUMAN	Glycogen debranching enzyme OS=Homo sapiens GN=AGL PE=1 SV=3	2	25	20	175	13.46	1.48235e-06	3.55718e-05	0.455591	12.5	10
188.1	sp	Q8NI27	THOC2_HUMAN	THO complex subunit 2 OS=Homo sapiens GN=THOC2 PE=1 SV=2	5	62	62	183	35.31	3.7196e-14	3.7196e-14	1	12.4	12.4
119.1	sp	P55060	XPO2_HUMAN	Exportin-2 OS=Homo sapiens GN=CSE1L PE=1 SV=3	8	97	95	110	90.62	3.95966e-21	1.36813e-20	0.885233	12.125	11.875
169.1	sp	Q8N3C0	HELC1_HUMAN	Activating signal cointegrator 1 complex subunit 3 OS=Homo sapiens GN=ASCC3 PE=1 SV=3	5	60	79	251	28.65	1.2979e-13	7.84485e-19	0.106509	12	15.8
251.1	sp	O60488	ACSL4_HUMAN	Long-chain-fatty-acid--CoA ligase 4 OS=Homo sapiens GN=ACSL4 PE=1 SV=2	1	12	12	79	16.43	0.000925723	0.000925723	1	12	12
576.1	sp	O75436	VP26A_HUMAN	Vacuolar protein sorting-associated protein 26A OS=Homo sapiens GN=VPS26A PE=1 SV=2	1	12	13	38	34.08	0.000925723	0.000477176	0.84146	12	13
518.1	sp	P51570	GALK1_HUMAN	Galactokinase OS=Homo sapiens GN=GALK1 PE=1 SV=1	1	12	19	42	37.87	0.000925723	8.66684e-06	0.206704	12	19
614.1	sp	P62888	RL30_HUMAN	60S ribosomal protein L30 OS=Homo sapiens GN=RPL30 PE=1 SV=2	1	12	11	13	93.92	0.000925723	0.00179214	0.834802	12	11
628.1	sp	Q5SY16	NOL9_HUMAN	Polynucleotide 5'-hydroxyl-kinase NOL9 OS=Homo sapiens GN=NOL9 PE=1 SV=1	1	12	10	79	14.51	0.000925723	0.00346111	0.669601	12	10
573.1	sp	Q9H936	GHC1_HUMAN	Mitochondrial glutamate carrier 1 OS=Homo sapiens GN=SLC25A22 PE=1 SV=1	1	12	14	34	39.19	0.000925723	0.000245515	0.694743	12	14
221.1	sp	P78344	IF4G2_HUMAN	Eukaryotic translation initiation factor 4 gamma 2 OS=Homo sapiens GN=EIF4G2 PE=1 SV=1	5	59	44	102	52.79	2.42084e-13	2.38205e-09	0.138706	11.8	8.8
14.1	sp	Q92616	GCN1L_HUMAN	Translational activator GCN1 OS=Homo sapiens GN=GCN1L1 PE=1 SV=6	42	492	541	293	183.71	5.12832e-99	3.95323e-112	0.127296	11.7143	12.881
200.1	sp	Q8TEQ6	GEMI5_HUMAN	Gem-associated protein 5 OS=Homo sapiens GN=GEMIN5 PE=1 SV=3	5	58	58	168	35.91	4.51036e-13	4.51036e-13	1	11.6	11.6
265.1	sp	P26640	SYVC_HUMAN	Valyl-tRNA synthetase OS=Homo sapiens GN=VARS PE=1 SV=4	4	46	42	140	32.77	1.21683e-10	1.45842e-09	0.669762	11.5	10.5
355.1	sp	O60762	DPM1_HUMAN	Dolichol-phosphate mannosyltransferase OS=Homo sapiens GN=DPM1 PE=1 SV=1	2	23	34	30	99.61	5.31989e-06	4.35572e-09	0.143859	11.5	17
381.1	sp	P09543	CN37_HUMAN	2',3'-cyclic-nucleotide 3'-phosphodiesterase OS=Homo sapiens GN=CNP PE=1 SV=2	2	23	28	48	55.73	5.31989e-06	2.15078e-07	0.483489	11.5	14
257.1	sp	Q16543	CDC37_HUMAN	Hsp90 co-chaperone Cdc37 OS=Homo sapiens GN=CDC37 PE=1 SV=1	3	34	58	44	106.88	3.39217e-08	6.85131e-15	0.0118452	11.3333	19.3333
275.1	sp	O60884	DNJA2_HUMAN	DnaJ homolog subfamily A member 2 OS=Homo sapiens GN=DNAJA2 PE=1 SV=1	3	33	52	46	96.24	6.34717e-08	3.40313e-13	0.0384919	11	17.3333
315.1	sp	Q9BV20	MTNA_HUMAN	Methylthioribose-1-phosphate isomerase OS=Homo sapiens GN=MRI1 PE=1 SV=1	3	33	32	39	86.9	6.34717e-08	1.18545e-07	0.901286	11	10.6667
334.1	sp	Q9UPN9	TRI33_HUMAN	E3 ubiquitin-protein ligase TRIM33 OS=Homo sapiens GN=TRIM33 PE=1 SV=3	3	33	25	122	24.91	6.34835e-08	8.83566e-06	0.292741	11	8.33333
358.1	sp	Q9BRX2	PELO_HUMAN	Protein pelota homolog OS=Homo sapiens GN=PELO PE=1 SV=2	2	22	34	43	66.92	1.00445e-05	4.35473e-09	0.10744	11	17
645.1	sp	O43747	AP1G1_HUMAN	AP-1 complex subunit gamma-1 OS=Homo sapiens GN=AP1G1 PE=1 SV=5	1	11	10	91	12.05	0.00179214	0.00346111	0.827227	11	10
629.1	sp	P62333	PRS10_HUMAN	26S protease regulatory subunit 10B OS=Homo sapiens GN=PSMC6 PE=1 SV=1	1	11	11	44	26.05	0.00179214	0.00179214	1	11	11
634.1	sp	Q8IWS0	PHF6_HUMAN	PHD finger protein 6 OS=Homo sapiens GN=PHF6 PE=1 SV=1	1	11	11	41	27.87	0.00179214	0.00179214	1	11	11
567.1	sp	Q96T88	UHRF1_HUMAN	E3 ubiquitin-protein ligase UHRF1 OS=Homo sapiens GN=UHRF1 PE=1 SV=1	1	11	15	90	15.04	0.00179214	0.000126116	0.431853	11	15
573.1	sp	Q9H1K4	GHC2_HUMAN	Mitochondrial glutamate carrier 2 OS=Homo sapiens GN=SLC25A18 PE=2 SV=1	1	11	11	34	34	0.00179214	0.00179214	1	11	11
602.1	sp	Q9NTJ3	SMC4_HUMAN	Structural maintenance of chromosomes protein 4 OS=Homo sapiens GN=SMC4 PE=1 SV=2	1	11	12	147	8.16	0.00179214	0.000925723	0.834802	11	12
208.1	sp	Q8N1G4	LRC47_HUMAN	Leucine-rich repeat-containing protein 47 OS=Homo sapiens GN=LRRC47 PE=1 SV=1	5	54	59	63	93.01	5.37117e-12	2.42084e-13	0.638043	10.8	11.8
144.1	sp	P47897	SYQ_HUMAN	Glutaminyl-tRNA synthetase OS=Homo sapiens GN=QARS PE=1 SV=1	8	86	74	88	95.73	3.4894e-18	5.03483e-15	0.342555	10.75	9.25
409.1	sp	Q01085	TIAR_HUMAN	Nucleolysin TIAR OS=Homo sapiens GN=TIAL1 PE=1 SV=1	2	21	26	42	58.94	1.89246e-05	7.80092e-07	0.465381	10.5	13
260.1	sp	Q86Y56	HEAT2_HUMAN	HEAT repeat-containing protein 2 OS=Homo sapiens GN=HEATR2 PE=1 SV=4	5	50	38	93	49.75	6.26416e-11	8.45747e-08	0.200123	10	7.6
749.1	sp	Q15386	UBE3C_HUMAN	Ubiquitin-protein ligase E3C OS=Homo sapiens GN=UBE3C PE=1 SV=3	1	10	5	124	6.46	0.00346111	0.087982	0.192431	10	5
736.1	sp	Q15392	DHC24_HUMAN	Delta(24)-sterol reductase OS=Homo sapiens GN=DHCR24 PE=1 SV=2	1	10	6	60	14.15	0.00346111	0.0465334	0.314739	10	6
587.1	sp	Q5SW79	CE170_HUMAN	Centrosomal protein of 170 kDa OS=Homo sapiens GN=CEP170 PE=1 SV=1	1	10	14	175	7.14	0.00346111	0.000245515	0.413126	10	14
128.1	sp	O14983	AT2A1_HUMAN	Sarcoplasmic/endoplasmic reticulum calcium ATPase 1 OS=Homo sapiens GN=ATP2A1 PE=1 SV=1	5	49	44	110	44.47	1.15343e-10	2.38205e-09	0.604039	9.8	8.8
56.1	sp	P53618	COPB_HUMAN	Coatomer subunit beta OS=Homo sapiens GN=COPB1 PE=1 SV=3	19	183	170	107	173.71	2.25622e-35	5.15013e-32	0.488938	9.63158	8.94737
80.1	sp	P46060	RAGP1_HUMAN	Ran GTPase-activating protein 1 OS=Homo sapiens GN=RANGAP1 PE=1 SV=1	14	134	134	64	222.04	2.76072e-26	2.76072e-26	1	9.57143	9.57143
196.1	sp	Q92621	NU205_HUMAN	Nuclear pore complex protein Nup205 OS=Homo sapiens GN=NUP205 PE=1 SV=3	6	56	61	228	27	9.04067e-12	4.34512e-13	0.643851	9.33333	10.1667
182.1	sp	O75131	CPNE3_HUMAN	Copine-3 OS=Homo sapiens GN=CPNE3 PE=1 SV=1	7	63	63	60	110.66	7.05477e-13	7.05477e-13	1	9	9
170.1	sp	P56192	SYMC_HUMAN	Methionyl-tRNA synthetase, cytoplasmic OS=Homo sapiens GN=MARS PE=1 SV=2	7	63	73	101	70.76	7.05592e-13	1.66273e-15	0.390959	9	10.4286
507.1	sp	P14678	RSMB_HUMAN	Small nuclear ribonucleoprotein-associated proteins B and B' OS=Homo sapiens GN=SNRPB PE=1 SV=2	2	18	14	25	69.12	0.000124568	0.00146368	0.478925	9	7
507.1	sp	P63162	RSMN_HUMAN	Small nuclear ribonucleoprotein-associated protein N OS=Homo sapiens GN=SNRPN PE=1 SV=1	2	18	14	25	69.11	0.000124568	0.00146368	0.478925	9	7
455.1	sp	P68400	CSK21_HUMAN	Casein kinase II subunit alpha OS=Homo sapiens GN=CSNK2A1 PE=1 SV=1	2	18	21	45	45.44	0.000124568	1.89281e-05	0.630785	9	10.5
577.1	sp	P30260	CDC27_HUMAN	Cell division cycle protein 27 homolog OS=Homo sapiens GN=CDC27 PE=1 SV=2	1	9	16	92	14.16	0.00666551	6.46896e-05	0.158713	9	16
473.1	sp	Q14202	ZMYM3_HUMAN	Zinc finger MYM-type protein 3 OS=Homo sapiens GN=ZMYM3 PE=1 SV=2	1	9	18	152	9.19	0.00666551	1.69562e-05	0.0803315	9	18
690.1	sp	Q7Z2T5	TRM1L_HUMAN	TRMT1-like protein OS=Homo sapiens GN=TRMT1L PE=1 SV=2	1	9	9	82	11.63	0.00666551	0.00666551	1	9	9
680.1	sp	Q86VM9	ZCH18_HUMAN	Zinc finger CCCH domain-containing protein 18 OS=Homo sapiens GN=ZC3H18 PE=1 SV=2	1	9	10	106	9.41	0.00666551	0.00346111	0.818505	9	10
674.1	sp	Q9NXF1	TEX10_HUMAN	Testis-expressed sequence 10 protein OS=Homo sapiens GN=TEX10 PE=1 SV=2	1	9	10	106	9.47	0.00666551	0.00346111	0.818505	9	10
247.1	sp	P30566	PUR8_HUMAN	Adenylosuccinate lyase OS=Homo sapiens GN=ADSL PE=1 SV=2	6	53	40	55	90.24	5.49168e-11	1.12515e-07	0.176937	8.83333	6.66667
87.1	sp	O00410	IPO5_HUMAN	Importin-5 OS=Homo sapiens GN=IPO5 PE=1 SV=4	14	123	131	124	108.46	1.92386e-23	1.65996e-25	0.615663	8.78571	9.35714
202.1	sp	Q9NUU7	DD19A_HUMAN	ATP-dependent RNA helicase DDX19A OS=Homo sapiens GN=DDX19A PE=1 SV=1	7	61	53	54	112.16	2.33006e-12	2.60548e-10	0.45351	8.71429	7.57143
233.1	sp	Q9Y2Z0	SUGT1_HUMAN	Suppressor of G2 allele of SKP1 homolog OS=Homo sapiens GN=SUGT1 PE=1 SV=3	4	34	65	41	125.61	1.92648e-07	7.08924e-16	0.00167788	8.5	16.25
296.1	sp	Q9BVP2	GNL3_HUMAN	Guanine nucleotide-binding protein-like 3 OS=Homo sapiens GN=GNL3 PE=1 SV=2	4	34	38	62	61.33	1.92679e-07	1.70305e-08	0.637265	8.5	9.5
492.1	sp	Q8IWZ3	ANKH1_HUMAN	Ankyrin repeat and KH domain-containing protein 1 OS=Homo sapiens GN=ANKHD1 PE=1 SV=1	2	17	15	269	6.5	0.000231936	0.000795439	0.723574	8.5	7.5
389.1	sp	O95248	MTMR5_HUMAN	Myotubularin-related protein 5 OS=Homo sapiens GN=SBF1 PE=1 SV=3	2	17	30	208	11.77	0.000231951	5.89155e-08	0.0563035	8.5	15
522.1	sp	O94905	ERLN2_HUMAN	Erlin-2 OS=Homo sapiens GN=ERLIN2 PE=1 SV=1	2	17	13	38	42.31	0.000231989	0.00267932	0.464544	8.5	6.5
109.1	sp	P41252	SYIC_HUMAN	Isoleucyl-tRNA synthetase, cytoplasmic OS=Homo sapiens GN=IARS PE=1 SV=2	11	91	120	144	76.87	2.58569e-17	7.17322e-25	0.0455428	8.27273	10.9091
481.1	sp	O15160	RPAC1_HUMAN	DNA-directed RNA polymerases I and III subunit RPAC1 OS=Homo sapiens GN=POLR1C PE=1 SV=1	2	16	19	39	47.16	0.000430406	6.6655e-05	0.611871	8	9.5
491.1	sp	Q04726	TLE3_HUMAN	Transducin-like enhancer protein 3 OS=Homo sapiens GN=TLE3 PE=1 SV=2	2	16	18	83	21.59	0.000430406	0.000124547	0.731526	8	9
532.1	sp	Q9Y5A9	YTHD2_HUMAN	YTH domain family protein 2 OS=Homo sapiens GN=YTHDF2 PE=1 SV=2	2	16	13	62	24.88	0.000430475	0.00267932	0.577128	8	6.5
792.1	sp	O00483	NDUA4_HUMAN	NADH dehydrogenase [ubiquinone] 1 alpha subcomplex subunit 4 OS=Homo sapiens GN=NDUFA4 PE=1 SV=1	1	8	5	9	74.75	0.012794	0.0879876	0.403259	8	5
409.1	sp	P31483	TIA1_HUMAN	Nucleolysin TIA-1 isoform p40 OS=Homo sapiens GN=TIA1 PE=1 SV=3	1	8	14	43	26.78	0.012794	0.000245515	0.197971	8	14
240.1	sp	Q9H3U1	UN45A_HUMAN	Protein unc-45 homolog A OS=Homo sapiens GN=UNC45A PE=1 SV=1	7	54	40	103	49.02	1.45351e-10	4.21116e-07	0.147986	7.71429	5.71429
60.1	sp	Q9Y265	RUVB1_HUMAN	RuvB-like 1 OS=Homo sapiens GN=RUVBL1 PE=1 SV=1	19	143	183	50	343.64	3.5283e-25	2.25622e-35	0.0265419	7.52632	9.63158
202.1	sp	Q9UMR2	DD19B_HUMAN	ATP-dependent RNA helicase DDX19B OS=Homo sapiens GN=DDX19B PE=1 SV=1	7	52	46	54	97.41	4.66163e-10	1.46406e-08	0.544328	7.42857	6.57143
360.1	sp	O43684	BUB3_HUMAN	Mitotic checkpoint protein BUB3 OS=Homo sapiens GN=BUB3 PE=1 SV=1	3	22	33	37	78.1	5.37479e-05	6.34717e-08	0.136683	7.33333	11
303.1	sp	P52209	6PGD_HUMAN	6-phosphogluconate dehydrogenase, decarboxylating OS=Homo sapiens GN=PGD PE=1 SV=3	4	29	40	53	68.73	3.78365e-06	5.00202e-09	0.184484	7.25	10
433.1	sp	Q14166	TTL12_HUMAN	Tubulin--tyrosine ligase-like protein 12 OS=Homo sapiens GN=TTLL12 PE=1 SV=2	3	21	21	74	30.26	9.7418e-05	9.7418e-05	1	7	7
492.1	sp	O75179	ANR17_HUMAN	Ankyrin repeat domain-containing protein 17 OS=Homo sapiens GN=ANKRD17 PE=1 SV=3	2	14	16	274	5.84	0.00146346	0.000430406	0.7149	7	8
717.1	sp	P23528	COF1_HUMAN	Cofilin-1 OS=Homo sapiens GN=CFL1 PE=1 SV=3	1	7	10	18	48.67	0.0244595	0.00346111	0.465686	7	10
708.1	sp	Q99460	PSMD1_HUMAN	26S proteasome non-ATPase regulatory subunit 1 OS=Homo sapiens GN=PSMD1 PE=1 SV=2	1	7	10	106	8.51	0.0244595	0.00346111	0.465686	7	10
847.1	sp	Q9BSF4	CS052_HUMAN	Uncharacterized protein C19orf52 OS=Homo sapiens GN=C19orf52 PE=1 SV=2	1	7	4	29	20.54	0.0244595	0.165058	0.362666	7	4
777.1	sp	Q9UKA9	PTBP2_HUMAN	Polypyrimidine tract-binding protein 2 OS=Homo sapiens GN=PTBP2 PE=1 SV=1	1	7	7	57	13.05	0.0244595	0.0244595	1	7	7
717.1	sp	Q9Y281	COF2_HUMAN	Cofilin-2 OS=Homo sapiens GN=CFL2 PE=1 SV=1	1	7	9	19	45.39	0.0244595	0.00666551	0.616614	7	9
327.1	sp	Q9Y6Q5	AP1M2_HUMAN	AP-1 complex subunit mu-2 OS=Homo sapiens GN=AP1M2 PE=1 SV=4	1	7	2	48	10.4	0.0244595	0.559959	0.0863158	7	2
130.1	sp	P53396	ACLY_HUMAN	ATP-citrate synthase OS=Homo sapiens GN=ACLY PE=1 SV=3	11	74	95	121	74.53	4.66856e-13	2.45117e-18	0.105776	6.72727	8.63636
19.1	sp	Q58FG1	HS904_HUMAN	Putative heat shock protein HSP 90-alpha A4 OS=Homo sapiens GN=HSP90AA4P PE=5 SV=1	3	20	24	48	52.43	0.000175875	1.61838e-05	0.546217	6.66667	8
140.1	sp	P62136	PP1A_HUMAN	Serine/threonine-protein phosphatase PP1-alpha catalytic subunit OS=Homo sapiens GN=PPP1CA PE=1 SV=1	13	84	74	37	228.07	2.56512e-14	6.31296e-12	0.426135	6.46154	5.69231
308.1	sp	Q9Y263	PLAP_HUMAN	Phospholipase A-2-activating protein OS=Homo sapiens GN=PLAA PE=1 SV=2	6	38	25	87	39.61	3.51116e-07	0.000404168	0.100228	6.33333	4.16667
204.1	sp	O14654	IRS4_HUMAN	Insulin receptor substrate 4 OS=Homo sapiens GN=IRS4 PE=1 SV=1	11	69	40	134	44.88	7.70377e-12	2.84473e-05	0.0051978	6.27273	3.63636
406.1	sp	Q9UBU9	NXF1_HUMAN	Nuclear RNA export factor 1 OS=Homo sapiens GN=NXF1 PE=1 SV=1	4	25	20	70	34.93	3.87118e-05	0.000644056	0.455591	6.25	5
181.1	sp	O43592	XPOT_HUMAN	Exportin-T OS=Homo sapiens GN=XPOT PE=1 SV=2	11	68	55	110	60.97	1.34264e-11	1.52488e-08	0.240689	6.18182	5
295.1	sp	O60716	CTND1_HUMAN	Catenin delta-1 OS=Homo sapiens GN=CTNND1 PE=1 SV=1	6	37	33	108	35.15	6.17609e-07	5.72418e-06	0.632492	6.16667	5.5
251.1	sp	O95573	ACSL3_HUMAN	Long-chain-fatty-acid--CoA ligase 3 OS=Homo sapiens GN=ACSL3 PE=1 SV=3	8	49	40	80	60.35	1.03181e-08	1.39449e-06	0.339672	6.125	5
162.1	sp	Q7Z2W4	ZCCHV_HUMAN	Zinc finger CCCH-type antiviral protein 1 OS=Homo sapiens GN=ZC3HAV1 PE=1 SV=3	13	78	61	101	74.97	7.11747e-13	6.10963e-09	0.148815	6	4.69231
506.1	sp	Q8WVX9	FACR1_HUMAN	Fatty acyl-CoA reductase 1 OS=Homo sapiens GN=FAR1 PE=1 SV=1	3	18	13	59	28.66	0.000565181	0.00943683	0.368125	6	4.33333
661.1	sp	P49959	MRE11_HUMAN	Double-strand break repair protein MRE11A OS=Homo sapiens GN=MRE11A PE=1 SV=3	2	12	7	81	13.04	0.004876	0.0863071	0.248554	6	3.5
550.1	sp	O00154	BACH_HUMAN	Cytosolic acyl coenzyme A thioester hydrolase OS=Homo sapiens GN=ACOT7 PE=1 SV=3	2	12	15	42	34.71	0.00487668	0.000795563	0.5633	6	7.5
414.1	sp	Q9H0B6	KLC2_HUMAN	Kinesin light chain 2 OS=Homo sapiens GN=KLC2 PE=1 SV=1	2	12	11	69	18.14	0.00487668	0.00881864	0.834802	6	5.5
592.1	sp	Q9NX58	LYAR_HUMAN	Cell growth-regulating nucleolar protein OS=Homo sapiens GN=LYAR PE=1 SV=2	2	12	11	44	28.68	0.00487668	0.00881864	0.834802	6	5.5
909.1	sp	Q8IWC1	MA7D3_HUMAN	MAP7 domain-containing protein 3 OS=Homo sapiens GN=MAP7D3 PE=1 SV=2	1	6	2	98	4.57	0.0465304	0.559959	0.147982	6	2
771.1	sp	O00487	PSDE_HUMAN	26S proteasome non-ATPase regulatory subunit 14 OS=Homo sapiens GN=PSMD14 PE=1 SV=1	1	6	8	35	21.7	0.0465334	0.012794	0.592347	6	8
941.1	sp	O15446	RPA34_HUMAN	DNA-directed RNA polymerase I subunit RPA34 OS=Homo sapiens GN=CD3EAP PE=1 SV=1	1	6	2	55	8.19	0.0465334	0.559959	0.147989	6	2
819.1	sp	Q16891	IMMT_HUMAN	Mitochondrial inner membrane protein OS=Homo sapiens GN=IMMT PE=1 SV=1	1	6	6	84	7.77	0.0465334	0.0465304	0.999977	6	6
675.1	sp	Q96H79	ZCCHL_HUMAN	Zinc finger CCCH-type antiviral protein 1-like OS=Homo sapiens GN=ZC3HAV1L PE=1 SV=2	1	6	13	33	30.36	0.0465334	0.000477176	0.104157	6	13
693.1	sp	Q9Y399	RT02_HUMAN	28S ribosomal protein S2, mitochondrial OS=Homo sapiens GN=MRPS2 PE=1 SV=1	1	6	12	33	28.59	0.0465334	0.000925723	0.153332	6	12
17.1	sp	P27708	PYR1_HUMAN	CAD protein OS=Homo sapiens GN=CAD PE=1 SV=3	68	403	400	243	179.34	2.2317e-59	1.12336e-58	0.915687	5.92647	5.88235
28.1	sp	P53675	CLH2_HUMAN	Clathrin heavy chain 2 OS=Homo sapiens GN=CLTCL1 PE=1 SV=2	10	59	59	187	34.24	5.34034e-10	5.34034e-10	1	5.9	5.9
63.1	sp	Q9P2J5	SYLC_HUMAN	Leucyl-tRNA synthetase, cytoplasmic OS=Homo sapiens GN=LARS PE=1 SV=2	28	162	146	134	125.02	1.56288e-24	7.69267e-21	0.361827	5.78571	5.21429
415.1	sp	P82650	RT22_HUMAN	28S ribosomal protein S22, mitochondrial OS=Homo sapiens GN=MRPS22 PE=1 SV=1	3	17	28	41	58.17	0.00100544	1.41289e-06	0.0993262	5.66667	9.33333
140.1	sp	P36873	PP1G_HUMAN	Serine/threonine-protein phosphatase PP1-gamma catalytic subunit OS=Homo sapiens GN=PPP1CC PE=1 SV=1	12	66	62	37	189.39	1.4051e-10	1.18946e-09	0.723652	5.5	5.16667
359.1	sp	Q96I24	FUBP3_HUMAN	Far upstream element-binding protein 3 OS=Homo sapiens GN=FUBP3 PE=1 SV=2	4	22	32	62	47.08	0.000212339	6.39155e-07	0.172327	5.5	8
135.1	sp	Q08J23	NSUN2_HUMAN	tRNA (cytosine(34)-C(5))-methyltransferase OS=Homo sapiens GN=NSUN2 PE=1 SV=2	15	81	79	86	101.25	1.64137e-12	4.75249e-12	0.874365	5.4	5.26667
114.1	sp	P49915	GUAA_HUMAN	GMP synthase [glutamine-hydrolyzing] OS=Homo sapiens GN=GMPS PE=1 SV=1	18	96	98	77	138.26	1.9395e-14	6.70047e-15	0.885822	5.33333	5.44444
128.1	sp	P16615	AT2A2_HUMAN	Sarcoplasmic/endoplasmic reticulum calcium ATPase 2 OS=Homo sapiens GN=ATP2A2 PE=1 SV=1	17	89	79	115	80.66	2.45179e-13	4.39081e-11	0.440266	5.23529	4.64706
140.1	sp	P62140	PP1B_HUMAN	Serine/threonine-protein phosphatase PP1-beta catalytic subunit OS=Homo sapiens GN=PPP1CB PE=1 SV=3	11	57	54	37	164.14	5.29871e-09	2.57662e-08	0.775824	5.18182	4.90909
40.1	sp	Q86VP6	CAND1_HUMAN	Cullin-associated NEDD8-dissociated protein 1 OS=Homo sapiens GN=CAND1 PE=1 SV=2	50	255	226	136	194.81	1.2335e-34	3.06108e-28	0.185939	5.1	4.52
215.1	sp	P15880	RS2_HUMAN	40S ribosomal protein S2 OS=Homo sapiens GN=RPS2 PE=1 SV=2	10	51	54	31	183.67	4.02984e-08	8.11419e-09	0.769683	5.1	5.4
137.1	sp	Q02880	TOP2B_HUMAN	DNA topoisomerase 2-beta OS=Homo sapiens GN=TOP2B PE=1 SV=3	15	76	81	183	46.96	2.30912e-11	1.64137e-12	0.689836	5.06667	5.4
28.1	sp	Q00610	CLH1_HUMAN	Clathrin heavy chain 1 OS=Homo sapiens GN=CLTC PE=1 SV=5	67	338	281	191	179.12	5.4026e-45	1.26248e-32	0.0218683	5.04478	4.19403
182.1	sp	O95741	CPNE6_HUMAN	Copine-6 OS=Homo sapiens GN=CPNE6 PE=1 SV=3	4	20	22	62	37.13	0.000644056	0.000212312	0.757576	5	5.5
182.1	sp	Q86YQ8	CPNE8_HUMAN	Copine-8 OS=Homo sapiens GN=CPNE8 PE=1 SV=2	4	20	22	63	36.47	0.000644056	0.000212312	0.757576	5	5.5
182.1	sp	Q8IYJ1	CPNE9_HUMAN	Copine-9 OS=Homo sapiens GN=CPNE9 PE=1 SV=3	4	20	22	62	37.2	0.000644056	0.000212312	0.757576	5	5.5
182.1	sp	Q96A23	CPNE4_HUMAN	Copine-4 OS=Homo sapiens GN=CPNE4 PE=2 SV=1	4	20	22	62	36.88	0.000644056	0.000212312	0.757576	5	5.5
182.1	sp	Q96FN4	CPNE2_HUMAN	Copine-2 OS=Homo sapiens GN=CPNE2 PE=1 SV=3	4	20	22	61	37.61	0.000644056	0.000212312	0.757576	5	5.5
182.1	sp	Q9HCH3	CPNE5_HUMAN	Copine-5 OS=Homo sapiens GN=CPNE5 PE=1 SV=2	4	20	22	66	35.01	0.000644056	0.000212312	0.757576	5	5.5
462.1	sp	Q9NRZ9	HELLS_HUMAN	Lymphoid-specific helicase OS=Homo sapiens GN=HELLS PE=1 SV=1	4	20	16	97	20.62	0.000644056	0.00549221	0.504545	5	4
182.1	sp	Q9UBL6	CPNE7_HUMAN	Copine-7 OS=Homo sapiens GN=CPNE7 PE=2 SV=1	4	20	22	70	32.74	0.000644056	0.000212312	0.757576	5	5.5
76.1	sp	Q9Y2L1	RRP44_HUMAN	Exosome complex exonuclease RRP44 OS=Homo sapiens GN=DIS3 PE=1 SV=2	29	144	118	109	133.57	6.70416e-20	2.92715e-14	0.107921	4.96552	4.06897
189.1	sp	P31689	DNJA1_HUMAN	DnaJ homolog subfamily A member 1 OS=Homo sapiens GN=DNAJA1 PE=1 SV=2	11	54	63	45	142.73	2.57662e-08	2.0984e-10	0.405149	4.90909	5.72727
348.1	sp	Q96CS3	FAF2_HUMAN	FAS-associated factor 2 OS=Homo sapiens GN=FAF2 PE=1 SV=2	6	29	26	53	57.99	4.99503e-05	0.000241601	0.685757	4.83333	4.33333
443.1	sp	Q6NXE6	ARMC6_HUMAN	Armadillo repeat-containing protein 6 OS=Homo sapiens GN=ARMC6 PE=1 SV=2	4	19	20	54	39.74	0.00111203	0.000644056	0.872773	4.75	5
69.1	sp	Q14974	IMB1_HUMAN	Importin subunit beta-1 OS=Homo sapiens GN=KPNB1 PE=1 SV=2	30	142	142	97	161.67	5.5249e-19	5.5249e-19	1	4.73333	4.73333
337.1	sp	Q9UBM7	DHCR7_HUMAN	7-dehydrocholesterol reductase OS=Homo sapiens GN=DHCR7 PE=1 SV=1	6	28	30	54	58.76	8.48938e-05	2.92463e-05	0.792829	4.66667	5
523.1	sp	Q8TC12	RDH11_HUMAN	Retinol dehydrogenase 11 OS=Homo sapiens GN=RDH11 PE=1 SV=2	3	14	15	35	45.24	0.00545208	0.00312486	0.852669	4.66667	5
141.1	sp	O43776	SYNC_HUMAN	Asparaginyl-tRNA synthetase, cytoplasmic OS=Homo sapiens GN=NARS PE=1 SV=1	19	88	64	63	135.92	3.75564e-12	3.86497e-07	0.0510882	4.63158	3.36842
414.1	sp	Q07866	KLC1_HUMAN	Kinesin light chain 1 OS=Homo sapiens GN=KLC1 PE=1 SV=2	5	23	20	65	36.77	0.000398353	0.00190672	0.647181	4.6	4
329.1	sp	Q96EY1	DNJA3_HUMAN	DnaJ homolog subfamily A member 3, mitochondrial OS=Homo sapiens GN=DNAJA3 PE=1 SV=2	7	32	26	52	61.96	3.09672e-05	0.0006448	0.430379	4.57143	3.71429
58.1	sp	Q9Y230	RUVB2_HUMAN	RuvB-like 2 OS=Homo sapiens GN=RUVBL2 PE=1 SV=3	34	152	176	51	354.03	2.34427e-19	1.13831e-24	0.184916	4.47059	5.17647
243.1	sp	Q13148	TADBP_HUMAN	TAR DNA-binding protein 43 OS=Homo sapiens GN=TARDBP PE=1 SV=1	9	40	52	45	112.94	4.15835e-06	7.06535e-09	0.210253	4.44444	5.77778
310.1	sp	P35998	PRS7_HUMAN	26S protease regulatory subunit 7 OS=Homo sapiens GN=PSMC2 PE=1 SV=3	7	31	31	49	70.98	5.20324e-05	5.20324e-05	1	4.42857	4.42857
259.1	sp	Q9GZV4	IF5A2_HUMAN	Eukaryotic translation initiation factor 5A-2 OS=Homo sapiens GN=EIF5A2 PE=1 SV=3	8	35	32	17	223.44	1.89414e-05	8.60916e-05	0.71394	4.375	4
7.1	sp	P49327	FAS_HUMAN	Fatty acid synthase OS=Homo sapiens GN=FASN PE=1 SV=3	320	1395	1305	273	552.6	4.34652e-160	2.76255e-141	0.083236	4.35938	4.07812
241.1	sp	P49790	NU153_HUMAN	Nuclear pore complex protein Nup153 OS=Homo sapiens GN=NUP153 PE=1 SV=2	12	52	37	154	32.83	2.08473e-07	0.000254903	0.110981	4.33333	3.08333
536.1	sp	P36776	LONM_HUMAN	Lon protease homolog, mitochondrial OS=Homo sapiens GN=LONP1 PE=1 SV=2	3	13	15	106	14.56	0.00943683	0.00312486	0.705337	4.33333	5
446.1	sp	Q13200	PSMD2_HUMAN	26S proteasome non-ATPase regulatory subunit 2 OS=Homo sapiens GN=PSMD2 PE=1 SV=3	3	13	26	100	20.97	0.00943683	4.80855e-06	0.0355747	4.33333	8.66667
259.1	sp	P63241	IF5A1_HUMAN	Eukaryotic translation initiation factor 5A-1 OS=Homo sapiens GN=EIF5A PE=1 SV=2	10	43	41	17	279.39	2.53794e-06	6.90488e-06	0.827251	4.3	4.1
259.1	sp	Q6IS14	IF5AL_HUMAN	Eukaryotic translation initiation factor 5A-1-like OS=Homo sapiens GN=EIF5AL1 PE=1 SV=2	10	43	41	17	280.37	2.53794e-06	6.90488e-06	0.827251	4.3	4.1
137.1	sp	P11388	TOP2A_HUMAN	DNA topoisomerase 2-alpha OS=Homo sapiens GN=TOP2A PE=1 SV=3	12	51	55	174	33.85	3.43984e-07	4.55542e-08	0.697601	4.25	4.58333
256.1	sp	O95831	AIFM1_HUMAN	Apoptosis-inducing factor 1, mitochondrial OS=Homo sapiens GN=AIFM1 PE=1 SV=1	9	38	48	67	71.04	1.14757e-05	6.2115e-08	0.280343	4.22222	5.33333
227.1	sp	P05198	IF2A_HUMAN	Eukaryotic translation initiation factor 2 subunit 1 OS=Homo sapiens GN=EIF2S1 PE=1 SV=3	10	42	55	36	148.24	4.19436e-06	4.73076e-09	0.186189	4.2	5.5
366.1	sp	Q9BW92	SYTM_HUMAN	Threonyl-tRNA synthetase, mitochondrial OS=Homo sapiens GN=TARS2 PE=1 SV=1	7	29	21	81	35.19	0.000144763	0.0067984	0.256876	4.14286	3
4.4	sp	Q9BVA1	TBB2B_HUMAN	Tubulin beta-2B chain OS=Homo sapiens GN=TUBB2B PE=1 SV=1	254	1048	1044	50	2349.67	4.56277e-115	3.07108e-114	0.930311	4.12598	4.11024
197.1	sp	P11908	PRPS2_HUMAN	Ribose-phosphate pyrophosphokinase 2 OS=Homo sapiens GN=PRPS2 PE=1 SV=2	9	37	46	35	132.38	1.89452e-05	1.8114e-07	0.322736	4.11111	5.11111
300.1	sp	Q9UQ80	PA2G4_HUMAN	Proliferation-associated protein 2G4 OS=Homo sapiens GN=PA2G4 PE=1 SV=3	8	32	34	44	84.55	8.60916e-05	3.15231e-05	0.805526	4	4.25
305.1	sp	Q04637	IF4G1_HUMAN	Eukaryotic translation initiation factor 4 gamma 1 OS=Homo sapiens GN=EIF4G1 PE=1 SV=4	7	28	36	175	20.24	0.000239566	3.72081e-06	0.316677	4	5.14286
512.1	sp	P42285	SK2L2_HUMAN	Superkiller viralicidic activity 2-like 2 OS=Homo sapiens GN=SKIV2L2 PE=1 SV=3	3	12	17	118	13.59	0.016188	0.00100544	0.351956	4	5.66667
578.1	sp	P53597	SUCA_HUMAN	Succinyl-CoA ligase [GDP-forming] subunit alpha, mitochondrial OS=Homo sapiens GN=SUCLG1 PE=1 SV=4	2	8	16	36	35.88	0.049601	0.000430406	0.0991984	4	8
718.1	sp	P46779	RL28_HUMAN	60S ribosomal protein L28 OS=Homo sapiens GN=RPL28 PE=1 SV=3	2	8	8	16	57.18	0.0496064	0.0496064	1	4	4
477.1	sp	Q8TAQ2	SMRC2_HUMAN	SWI/SNF complex subunit SMARCC2 OS=Homo sapiens GN=SMARCC2 PE=1 SV=1	2	8	4	133	5.27	0.0496064	0.409754	0.243678	4	2
648.1	sp	Q96EY7	PTCD3_HUMAN	Pentatricopeptide repeat-containing protein 3, mitochondrial OS=Homo sapiens GN=PTCD3 PE=1 SV=3	2	8	12	79	14.01	0.0496064	0.00487668	0.369478	4	6
89.1	sp	P07814	SYEP_HUMAN	Bifunctional aminoacyl-tRNA synthetase OS=Homo sapiens GN=EPRS PE=1 SV=5	25	99	141	170	77.72	6.25436e-12	3.16241e-21	0.00656611	3.96	5.64
255.1	sp	Q96QK1	VPS35_HUMAN	Vacuolar protein sorting-associated protein 35 OS=Homo sapiens GN=VPS35 PE=1 SV=2	9	35	51	92	51.83	5.09436e-05	1.22137e-08	0.0835653	3.88889	5.66667
8.1	sp	Q9NY65	TBA8_HUMAN	Tubulin alpha-8 chain OS=Homo sapiens GN=TUBA8 PE=1 SV=1	161	617	618	50	1394.26	5.60732e-64	3.52899e-64	0.977299	3.8323	3.83851
408.1	sp	Q15084	PDIA6_HUMAN	Protein disulfide-isomerase A6 OS=Homo sapiens GN=PDIA6 PE=1 SV=1	5	19	25	48	50.94	0.00316896	0.000136115	0.364965	3.8	5
290.1	sp	Q9P035	HACD3_HUMAN	3-hydroxyacyl-CoA dehydratase 3 OS=Homo sapiens GN=PTPLAD1 PE=1 SV=2	8	30	40	43	90.42	0.000230375	1.39449e-06	0.231199	3.75	5
201.1	sp	Q96PK6	RBM14_HUMAN	RNA-binding protein 14 OS=Homo sapiens GN=RBM14 PE=1 SV=2	17	62	42	69	87.11	1.7985e-07	0.000943415	0.0491501	3.64706	2.47059
129.1	sp	P33992	MCM5_HUMAN	DNA replication licensing factor MCM5 OS=Homo sapiens GN=MCM5 PE=1 SV=5	24	87	73	82	111.88	7.15628e-10	3.53972e-07	0.268076	3.625	3.04167
123.1	sp	P25205	MCM3_HUMAN	DNA replication licensing factor MCM3 OS=Homo sapiens GN=MCM3 PE=1 SV=3	24	86	84	91	106.68	1.13322e-09	2.82161e-09	0.878087	3.58333	3.5
209.1	sp	P61313	RL15_HUMAN	60S ribosomal protein L15 OS=Homo sapiens GN=RPL15 PE=1 SV=2	14	50	54	24	244.49	3.5725e-06	5.39083e-07	0.694851	3.57143	3.85714
411.1	sp	Q6PKG0	LARP1_HUMAN	La-related protein 1 OS=Homo sapiens GN=LARP1 PE=1 SV=2	7	25	16	123	19.44	0.00104796	0.0571707	0.158154	3.57143	2.28571
4.1	sp	Q9BUF5	TBB6_HUMAN	Tubulin beta-6 chain OS=Homo sapiens GN=TUBB6 PE=1 SV=1	49	174	173	50	397.38	6.72851e-18	1.05552e-17	0.957188	3.55102	3.53061
73.1	sp	P35606	COPB2_HUMAN	Coatomer subunit beta' OS=Homo sapiens GN=COPB2 PE=1 SV=2	42	148	107	102	144.99	2.44924e-15	6.09967e-08	0.0100791	3.52381	2.54762
223.1	sp	P02768	ALBU_HUMAN	Serum albumin OS=Homo sapiens GN=ALB PE=1 SV=2	23	81	4	69	77.9	4.78537e-09	0.000120948	2.2303e-20	3.52174	0.173913
24.1	sp	P53621	COPA_HUMAN	Coatomer subunit alpha OS=Homo sapiens GN=COPA PE=1 SV=2	98	341	311	138	271.23	7.99023e-33	3.54738e-27	0.239955	3.47959	3.17347
8.1	sp	P68366	TBA4A_HUMAN	Tubulin alpha-4A chain OS=Homo sapiens GN=TUBA4A PE=1 SV=1	258	894	899	50	2055.38	8.48847e-83	9.34017e-84	0.906003	3.46512	3.4845
87.2	sp	O60518	RNBP6_HUMAN	Ran-binding protein 6 OS=Homo sapiens GN=RANBP6 PE=1 SV=2	7	24	25	125	22.47	0.00169164	0.00104796	0.886399	3.42857	3.57143
361.1	sp	Q9NZ01	TECR_HUMAN	Trans-2,3-enoyl-CoA reductase OS=Homo sapiens GN=TECR PE=1 SV=1	7	24	27	36	80.53	0.00169164	0.000394213	0.674335	3.42857	3.85714
378.1	sp	P50402	EMD_HUMAN	Emerin OS=Homo sapiens GN=EMD PE=1 SV=1	5	17	32	29	93.18	0.00854163	2.74583e-06	0.0307586	3.4	6.4
477.1	sp	Q92922	SMRC1_HUMAN	SWI/SNF complex subunit SMARCC1 OS=Homo sapiens GN=SMARCC1 PE=1 SV=3	5	17	15	123	15.07	0.00854163	0.0221689	0.723587	3.4	3
199.1	sp	P62906	RL10A_HUMAN	60S ribosomal protein L10a OS=Homo sapiens GN=RPL10A PE=1 SV=2	16	54	52	25	245.8	3.05073e-06	7.47698e-06	0.84597	3.375	3.25
407.1	sp	Q9NZB2	F120A_HUMAN	Constitutive coactivator of PPAR-gamma-like protein 1 OS=Homo sapiens GN=FAM120A PE=1 SV=2	8	27	14	122	20.11	0.000965704	0.197971	0.0405683	3.375	1.75
98.1	sp	P13639	EF2_HUMAN	Elongation factor 2 OS=Homo sapiens GN=EEF2 PE=1 SV=4	27	91	125	95	127.52	1.41157e-09	1.26192e-16	0.020437	3.37037	4.62963
590.1	sp	P51114	FXR1_HUMAN	Fragile X mental retardation syndrome-related protein 1 OS=Homo sapiens GN=FXR1 PE=1 SV=3	3	10	12	70	17.94	0.0461388	0.016188	0.669601	3.33333	4
505.1	sp	Q9Y676	RT18B_HUMAN	28S ribosomal protein S18b, mitochondrial OS=Homo sapiens GN=MRPS18B PE=1 SV=1	3	10	21	29	57.87	0.0461388	9.7418e-05	0.0457829	3.33333	7
663.1	sp	P62314	SMD1_HUMAN	Small nuclear ribonucleoprotein Sm D1 OS=Homo sapiens GN=SNRPD1 PE=1 SV=1	3	10	8	13	79.1	0.0461431	0.124629	0.637004	3.33333	2.66667
804.1	sp	Q9C0J8	WDR33_HUMAN	WD repeat-containing protein 33 OS=Homo sapiens GN=WDR33 PE=1 SV=2	3	10	0.1	146	4.46	0.0461431	0.0415105	0.000197104	3.33333	0.0333333
4.3	sp	Q13885	TBB2A_HUMAN	Tubulin beta-2A chain OS=Homo sapiens GN=TUBB2A PE=1 SV=1	436	1424	1480	50	3348.31	3.11767e-122	1.01076e-132	0.298707	3.26606	3.3945
65.1	sp	Q96SI9	STRBP_HUMAN	Spermatid perinuclear RNA-binding protein OS=Homo sapiens GN=STRBP PE=1 SV=1	8	26	18	74	35.32	0.00153712	0.0469527	0.226506	3.25	2.25
508.1	sp	Q9NXH9	TRM1_HUMAN	N(2),N(2)-dimethylguanosine tRNA methyltransferase OS=Homo sapiens GN=TRMT1 PE=1 SV=1	4	13	16	72	22.86	0.0251027	0.00549221	0.577128	3.25	4
520.1	sp	Q9Y295	DRG1_HUMAN	Developmentally-regulated GTP-binding protein 1 OS=Homo sapiens GN=DRG1 PE=1 SV=1	5	16	11	41	39.49	0.013832	0.12888	0.334527	3.2	2.2
4.1	sp	P04350	TBB4_HUMAN	Tubulin beta-4 chain OS=Homo sapiens GN=TUBB4 PE=1 SV=2	417	1331	1386	50	3162.15	2.72127e-111	1.79429e-121	0.291336	3.19185	3.32374
138.1	sp	P09884	DPOLA_HUMAN	DNA polymerase alpha catalytic subunit OS=Homo sapiens GN=POLA1 PE=1 SV=2	21	67	84	166	51.87	4.95469e-07	1.99005e-10	0.166081	3.19048	4
175.1	sp	Q92900	RENT1_HUMAN	Regulator of nonsense transcripts 1 OS=Homo sapiens GN=UPF1 PE=1 SV=2	21	67	52	124	56.33	4.95469e-07	0.000227188	0.16855	3.19048	2.47619
32.1	sp	Q13263	TIF1B_HUMAN	Transcription intermediary factor 1-beta OS=Homo sapiens GN=TRIM28 PE=1 SV=5	90	285	258	88	357.65	5.58527e-25	3.67043e-20	0.246489	3.16667	2.86667
346.1	sp	Q2VIR3	IF2GL_HUMAN	Eukaryotic translation initiation factor 2 subunit 3-like protein OS=Homo sapiens GN=EIF2S3L PE=1 SV=2	6	19	18	51	41.99	0.00769395	0.0122179	0.869409	3.16667	3
420.1	sp	P40429	RL13A_HUMAN	60S ribosomal protein L13a OS=Homo sapiens GN=RPL13A PE=1 SV=2	7	22	19	24	101.85	0.00431124	0.0164518	0.639262	3.14286	2.71429
197.1	sp	P60891	PRPS1_HUMAN	Ribose-phosphate pyrophosphokinase 1 OS=Homo sapiens GN=PRPS1 PE=1 SV=2	16	50	57	35	176.66	1.80365e-05	7.73361e-07	0.498433	3.125	3.5625
396.1	sp	Q10570	CPSF1_HUMAN	Cleavage and polyadenylation specificity factor subunit 1 OS=Homo sapiens GN=CPSF1 PE=1 SV=2	8	25	17	161	15.55	0.00242933	0.0686969	0.215639	3.125	2.125
8.1	sp	Q13748	TBA3C_HUMAN	Tubulin alpha-3C/D chain OS=Homo sapiens GN=TUBA3C PE=1 SV=3	309	962	985	50	2259.23	1.49858e-78	9.86759e-83	0.602189	3.11327	3.1877
159.1	sp	P00558	PGK1_HUMAN	Phosphoglycerate kinase 1 OS=Homo sapiens GN=PGK1 PE=1 SV=3	18	56	80	45	172.7	6.03546e-06	7.51214e-11	0.0390761	3.11111	4.44444
317.1	sp	Q16531	DDB1_HUMAN	DNA damage-binding protein 1 OS=Homo sapiens GN=DDB1 PE=1 SV=1	9	28	30	127	26.4	0.00137542	0.000552503	0.792829	3.11111	3.33333
8.1	sp	P68363	TBA1B_HUMAN	Tubulin alpha-1B chain OS=Homo sapiens GN=TUBA1B PE=1 SV=1	384	1194	1275	50	2846.13	6.95373e-97	9.06331e-112	0.103041	3.10938	3.32031
4.1	sp	Q13509	TBB3_HUMAN	Tubulin beta-3 chain OS=Homo sapiens GN=TUBB3 PE=1 SV=2	333	1032	1079	50	2424.54	1.18094e-83	3.16303e-92	0.306312	3.0991	3.24024
79.1	sp	Q9Y5B9	SP16H_HUMAN	FACT complex subunit SPT16 OS=Homo sapiens GN=SUPT16H PE=1 SV=1	40	123	122	120	118.91	2.8012e-11	4.26139e-11	0.94906	3.075	3.05
8.1	sp	Q6PEY2	TBA3E_HUMAN	Tubulin alpha-3E chain OS=Homo sapiens GN=TUBA3E PE=1 SV=2	277	847	857	50	1987.86	7.57392e-68	1.2184e-69	0.808585	3.05776	3.09386
8.1	sp	Q71U36	TBA1A_HUMAN	Tubulin alpha-1A chain OS=Homo sapiens GN=TUBA1A PE=1 SV=1	368	1123	1212	50	2697.36	4.07837e-89	2.37809e-105	0.0654692	3.05163	3.29348
66.1	sp	P33993	MCM7_HUMAN	DNA replication licensing factor MCM7 OS=Homo sapiens GN=MCM7 PE=1 SV=4	45	137	138	81	196.9	2.95009e-12	1.94212e-12	0.951915	3.04444	3.06667
218.1	sp	Q3ZCQ8	TIM50_HUMAN	Mitochondrial import inner membrane translocase subunit TIM50 OS=Homo sapiens GN=TIMM50 PE=1 SV=2	17	51	43	40	140.07	2.4662e-05	0.000642447	0.40901	3	2.52941
286.1	sp	P11586	C1TC_HUMAN	C-1-tetrahydrofolate synthase, cytoplasmic OS=Homo sapiens GN=MTHFD1 PE=1 SV=3	11	33	37	101	39.9	0.000691685	0.000115275	0.632492	3	3.36364
346.1	sp	P41091	IF2G_HUMAN	Eukaryotic translation initiation factor 2 subunit 3 OS=Homo sapiens GN=EIF2S3 PE=1 SV=3	9	27	25	51	59.71	0.00214811	0.00512349	0.781485	3	2.77778
537.1	sp	Q96J01	THOC3_HUMAN	THO complex subunit 3 OS=Homo sapiens GN=THOC3 PE=1 SV=1	4	12	15	39	40	0.0407629	0.00920507	0.5633	3	3.75
8.1	sp	Q9BQE3	TBA1C_HUMAN	Tubulin alpha-1C chain OS=Homo sapiens GN=TUBA1C PE=1 SV=1	375	1116	1184	50	2682.27	9.38594e-86	6.45528e-98	0.15619	2.976	3.15733
4.2	sp	P68371	TBB2C_HUMAN	Tubulin beta-2C chain OS=Homo sapiens GN=TUBB2C PE=1 SV=1	514	1510	1579	50	3617.47	2.19551e-113	1.43796e-125	0.214409	2.93774	3.07198
167.1	sp	Q9UJS0	CMC2_HUMAN	Calcium-binding mitochondrial carrier protein Aralar2 OS=Homo sapiens GN=SLC25A13 PE=1 SV=2	21	61	64	74	98.48	6.3798e-06	1.80583e-06	0.788437	2.90476	3.04762
8.1	sp	A6NHL2	TBAL3_HUMAN	Tubulin alpha chain-like 3 OS=Homo sapiens GN=TUBAL3 PE=1 SV=2	49	142	172	50	363.89	6.19449e-12	1.65379e-17	0.0902102	2.89796	3.5102
26.1	sp	P17844	DDX5_HUMAN	Probable ATP-dependent RNA helicase DDX5 OS=Homo sapiens GN=DDX5 PE=1 SV=1	111	320	295	69	525.28	8.36989e-25	1.3918e-20	0.313341	2.88288	2.65766
104.1	sp	P12004	PCNA_HUMAN	Proliferating cell nuclear antigen OS=Homo sapiens GN=PCNA PE=1 SV=1	34	98	104	29	410.42	1.26962e-08	1.05937e-09	0.672887	2.88235	3.05882
115.1	sp	P20042	IF2B_HUMAN	Eukaryotic translation initiation factor 2 subunit 2 OS=Homo sapiens GN=EIF2S2 PE=1 SV=2	30	86	91	38	269.77	1.09586e-07	1.38478e-08	0.70703	2.86667	3.03333
78.1	sp	P60842	IF4A1_HUMAN	Eukaryotic initiation factor 4A-I OS=Homo sapiens GN=EIF4A1 PE=1 SV=1	41	117	128	46	310.02	6.66582e-10	7.06024e-12	0.482129	2.85366	3.12195
44.1	sp	P52272	HNRPM_HUMAN	Heterogeneous nuclear ribonucleoprotein M OS=Homo sapiens GN=HNRNPM PE=1 SV=3	78	222	171	77	304.01	2.09372e-17	2.43376e-09	0.00998807	2.84615	2.19231
116.1	sp	Q00325	MPCP_HUMAN	Phosphate carrier protein, mitochondrial OS=Homo sapiens GN=SLC25A3 PE=1 SV=2	26	74	89	40	235.84	9.54367e-07	1.53628e-09	0.239706	2.84615	3.42308
430.1	sp	P61619	S61A1_HUMAN	Protein transport protein Sec61 subunit alpha isoform 1 OS=Homo sapiens GN=SEC61A1 PE=1 SV=2	6	17	23	52	44.03	0.0192088	0.00111074	0.34187	2.83333	3.83333
134.1	sp	Q8TD47	RS4Y2_HUMAN	40S ribosomal protein S4, Y isoform 2 OS=Homo sapiens GN=RPS4Y2 PE=1 SV=3	6	17	22	29	76.85	0.0192088	0.00182296	0.422701	2.83333	3.66667
4.1	sp	P07437	TBB5_HUMAN	Tubulin beta chain OS=Homo sapiens GN=TUBB PE=1 SV=2	647	1824	1954	50	4457.09	4.97793e-129	1.45213e-151	0.0344113	2.81917	3.02009
90.1	sp	Q15365	PCBP1_HUMAN	Poly(rC)-binding protein 1 OS=Homo sapiens GN=PCBP1 PE=1 SV=2	35	98	113	37	328.22	2.48597e-08	4.791e-11	0.301567	2.8	3.22857
501.1	sp	P33991	MCM4_HUMAN	DNA replication licensing factor MCM4 OS=Homo sapiens GN=MCM4 PE=1 SV=5	5	14	15	96	17.62	0.035129	0.0221689	0.852669	2.8	3
442.1	sp	P08708	RS17_HUMAN	40S ribosomal protein S17 OS=Homo sapiens GN=RPS17 PE=1 SV=2	5	14	24	16	138.34	0.0351316	0.000233516	0.102718	2.8	4.8
442.1	sp	P0CW22	RS17L_HUMAN	40S ribosomal protein S17-like OS=Homo sapiens GN=RPS17L PE=3 SV=1	5	14	24	16	138.34	0.0351316	0.000233516	0.102718	2.8	4.8
402.1	sp	Q2TAY7	SMU1_HUMAN	WD40 repeat-containing protein SMU1 OS=Homo sapiens GN=SMU1 PE=1 SV=2	9	25	16	58	43.47	0.00512349	0.158713	0.158154	2.77778	1.77778
367.1	sp	Q9BUQ8	DDX23_HUMAN	Probable ATP-dependent RNA helicase DDX23 OS=Homo sapiens GN=DDX23 PE=1 SV=3	9	25	23	96	29.84	0.00512349	0.0118238	0.772798	2.77778	2.55556
183.1	sp	Q9NVI7	ATD3A_HUMAN	ATPase family AAA domain-containing protein 3A OS=Homo sapiens GN=ATAD3A PE=1 SV=2	21	58	52	71	91.83	2.17928e-05	0.000227188	0.567173	2.7619	2.47619
30.1	sp	P40227	TCPZ_HUMAN	T-complex protein 1 subunit zeta OS=Homo sapiens GN=CCT6A PE=1 SV=3	99	273	266	58	550.11	3.56179e-20	5.26584e-19	0.763021	2.75758	2.68687
90.1	sp	Q15366	PCBP2_HUMAN	Poly(rC)-binding protein 2 OS=Homo sapiens GN=PCBP2 PE=1 SV=1	39	107	118	39	342.35	9.55856e-09	1.1049e-10	0.463266	2.74359	3.02564
120.1	sp	Q9NR30	DDX21_HUMAN	Nucleolar RNA helicase 2 OS=Homo sapiens GN=DDX21 PE=1 SV=5	37	101	60	87	113.41	2.78924e-08	0.0189525	0.00115757	2.72973	1.62162
328.1	sp	P62277	RS13_HUMAN	40S ribosomal protein S13 OS=Homo sapiens GN=RPS13 PE=1 SV=2	10	27	28	17	188.81	0.00439766	0.0028866	0.892735	2.7	2.8
316.1	sp	Q07020	RL18_HUMAN	60S ribosomal protein L18 OS=Homo sapiens GN=RPL18 PE=1 SV=2	10	27	31	22	157.25	0.00439796	0.000781811	0.599281	2.7	3.1
482.1	sp	Q9UNF1	MAGD2_HUMAN	Melanoma-associated antigen D2 OS=Homo sapiens GN=MAGED2 PE=1 SV=2	6	16	15	65	28.5	0.0298734	0.0459109	0.85745	2.66667	2.5
262.1	sp	Q15717	ELAV1_HUMAN	ELAV-like protein 1 OS=Homo sapiens GN=ELAVL1 PE=1 SV=2	14	37	42	36	128.92	0.00103923	0.00012937	0.573617	2.64286	3
230.1	sp	Q9UG63	ABCF2_HUMAN	ATP-binding cassette sub-family F member 2 OS=Homo sapiens GN=ABCF2 PE=1 SV=2	16	42	46	71	72.99	0.000509445	9.96442e-05	0.669762	2.625	2.875
372.1	sp	P49643	PRI2_HUMAN	DNA primase large subunit OS=Homo sapiens GN=PRIM2 PE=1 SV=2	8	21	27	59	47.64	0.0139822	0.000965704	0.385855	2.625	3.375
388.1	sp	P62081	RS7_HUMAN	40S ribosomal protein S7 OS=Homo sapiens GN=RPS7 PE=1 SV=1	8	21	23	22	117.57	0.0139822	0.00592913	0.762985	2.625	2.875
172.1	sp	Q14315	FLNC_HUMAN	Filamin-C OS=Homo sapiens GN=FLNC PE=1 SV=3	8	21	13	291	7.22	0.0139822	0.272925	0.168065	2.625	1.625
427.1	sp	Q8IVS2	FABD_HUMAN	Malonyl-CoA-acyl carrier protein transacylase, mitochondrial OS=Homo sapiens GN=MCAT PE=1 SV=2	8	21	18	43	54.73	0.0139822	0.0469527	0.630785	2.625	2.25
121.1	sp	P36578	RL4_HUMAN	60S ribosomal protein L4 OS=Homo sapiens GN=RPL4 PE=1 SV=5	30	78	90	48	207.68	2.59098e-06	2.10534e-08	0.354335	2.6	3
217.1	sp	P23526	SAHH_HUMAN	Adenosylhomocysteinase OS=Homo sapiens GN=AHCY PE=1 SV=4	15	39	57	48	116.39	0.000887383	3.20408e-07	0.065392	2.6	3.8
70.1	sp	O43175	SERA_HUMAN	D-3-phosphoglycerate dehydrogenase OS=Homo sapiens GN=PHGDH PE=1 SV=4	47	122	141	57	273.78	4.32207e-09	2.32886e-12	0.241157	2.59574	3
115.1	sp	A6NK07	IF2BL_HUMAN	Eukaryotic translation initiation factor 2 subunit 2-like protein OS=Homo sapiens PE=1 SV=1	29	75	77	38	239.65	4.43343e-06	2.05032e-06	0.87113	2.58621	2.65517
4.1	sp	A6NNZ2	TBB8B_HUMAN	Tubulin beta-8 chain B OS=Homo sapiens PE=1 SV=1	206	531	583	50	1332.21	3.94445e-34	1.00598e-42	0.119172	2.57767	2.8301
464.1	sp	Q8NI60	ADCK3_HUMAN	Chaperone activity of bc1 complex-like, mitochondrial OS=Homo sapiens GN=ADCK3 PE=1 SV=1	7	18	15	72	27.81	0.0252058	0.0844632	0.601257	2.57143	2.14286
420.1	sp	Q6NVV1	R13AX_HUMAN	Putative 60S ribosomal protein L13a-like MGC87657 OS=Homo sapiens PE=5 SV=1	7	18	17	12	173.15	0.0252075	0.0381938	0.865763	2.57143	2.42857
374.1	sp	Q12931	TRAP1_HUMAN	Heat shock protein 75 kDa, mitochondrial OS=Homo sapiens GN=TRAP1 PE=1 SV=3	9	23	24	80	34.97	0.0118238	0.00781738	0.884024	2.55556	2.66667
20.1	sp	P50991	TCPD_HUMAN	T-complex protein 1 subunit delta OS=Homo sapiens GN=CCT4 PE=1 SV=4	135	340	336	58	700.48	1.14565e-21	4.85442e-21	0.877731	2.51852	2.48889
149.1	sp	Q14157	UBP2L_HUMAN	Ubiquitin-associated protein 2-like OS=Homo sapiens GN=UBAP2L PE=1 SV=2	28	70	64	114	70.76	1.61559e-05	0.000142374	0.604174	2.5	2.28571
214.1	sp	P55265	DSRAD_HUMAN	Double-stranded RNA-specific adenosine deaminase OS=Homo sapiens GN=ADAR PE=1 SV=4	20	50	45	136	42.29	0.000267843	0.00168205	0.607876	2.5	2.25
419.1	sp	Q96DI7	SNR40_HUMAN	U5 small nuclear ribonucleoprotein 40 kDa protein OS=Homo sapiens GN=SNRNP40 PE=1 SV=1	8	20	20	39	61.09	0.0211651	0.0211651	1	2.5	2.5
184.1	sp	P07737	PROF1_HUMAN	Profilin-1 OS=Homo sapiens GN=PFN1 PE=1 SV=2	22	54	56	15	438.67	0.000192486	9.02887e-05	0.848762	2.45455	2.54545
19.1	sp	Q14568	HS902_HUMAN	Putative heat shock protein HSP 90-alpha A2 OS=Homo sapiens GN=HSP90AA2 PE=1 SV=2	29	71	100	39	254.18	1.98973e-05	1.28083e-10	0.026212	2.44828	3.44828
176.1	sp	P26368	U2AF2_HUMAN	Splicing factor U2AF 65 kDa subunit OS=Homo sapiens GN=U2AF2 PE=1 SV=4	25	61	54	53	130.92	8.06078e-05	0.000962389	0.513785	2.44	2.16
266.1	sp	P26358	DNMT1_HUMAN	DNA (cytosine-5)-methyltransferase 1 OS=Homo sapiens GN=DNMT1 PE=1 SV=2	16	39	37	183	25.13	0.00163476	0.00344873	0.818536	2.4375	2.3125
120.1	sp	Q9BQ39	DDX50_HUMAN	ATP-dependent RNA helicase DDX50 OS=Homo sapiens GN=DDX50 PE=1 SV=1	7	17	12	83	21.81	0.0381914	0.248554	0.351956	2.42857	1.71429
41.2	sp	P52597	HNRPF_HUMAN	Heterogeneous nuclear ribonucleoprotein F OS=Homo sapiens GN=HNRNPF PE=1 SV=3	48	115	119	46	308.91	1.00046e-07	2.36645e-08	0.793711	2.39583	2.47917
224.1	sp	Q14739	LBR_HUMAN	Lamin-B receptor OS=Homo sapiens GN=LBR PE=1 SV=2	18	43	47	71	76.42	0.00115941	0.000250815	0.673239	2.38889	2.61111
84.1	sp	P12236	ADT3_HUMAN	ADP/ATP translocase 3 OS=Homo sapiens GN=SLC25A6 PE=1 SV=4	42	100	112	33	386.65	7.83825e-07	9.14071e-09	0.409722	2.38095	2.66667
268.1	sp	P46777	RL5_HUMAN	60S ribosomal protein L5 OS=Homo sapiens GN=RPL5 PE=1 SV=3	16	38	38	34	133.95	0.00238211	0.00238211	1	2.375	2.375
452.1	sp	Q09028	RBBP4_HUMAN	Histone-binding protein RBBP4 OS=Homo sapiens GN=RBBP4 PE=1 SV=3	8	19	15	48	44.09	0.0317027	0.141221	0.492215	2.375	1.875
211.1	sp	P17812	PYRG1_HUMAN	CTP synthase 1 OS=Homo sapiens GN=CTPS PE=1 SV=2	22	52	43	67	87.77	0.000402756	0.00858173	0.355448	2.36364	1.95455
263.1	sp	P13489	RINI_HUMAN	Ribonuclease inhibitor OS=Homo sapiens GN=RNH1 PE=1 SV=2	15	35	43	50	93.11	0.00412424	0.000173491	0.364608	2.33333	2.86667
297.1	sp	P39748	FEN1_HUMAN	Flap endonuclease 1 OS=Homo sapiens GN=FEN1 PE=1 SV=1	12	28	36	43	89.27	0.0102979	0.000394523	0.316677	2.33333	3
4.1	sp	Q3ZCM7	TBB8_HUMAN	Tubulin beta-8 chain OS=Homo sapiens GN=TUBB8 PE=1 SV=2	247	576	642	50	1472.51	2.88449e-31	1.96861e-41	0.0585458	2.33198	2.59919
18.1	sp	O75643	U520_HUMAN	U5 small nuclear ribonucleoprotein 200 kDa helicase OS=Homo sapiens GN=SNRNP200 PE=1 SV=2	146	339	381	244	177.2	6.30747e-19	2.01196e-25	0.117421	2.32192	2.60959
183.1	sp	Q5T2N8	ATD3C_HUMAN	ATPase family AAA domain-containing protein 3C OS=Homo sapiens GN=ATAD3C PE=1 SV=2	16	37	30	46	89.53	0.00344873	0.0374635	0.392016	2.3125	1.875
62.1	sp	Q9H361	PABP3_HUMAN	Polyadenylate-binding protein 3 OS=Homo sapiens GN=PABPC3 PE=1 SV=2	33	76	65	70	124.31	2.97581e-05	0.00110484	0.354011	2.30303	1.9697
39.1	sp	Q6P2Q9	PRP8_HUMAN	Pre-mRNA-processing-splicing factor 8 OS=Homo sapiens GN=PRPF8 PE=1 SV=2	92	210	258	273	102.4	5.91592e-12	1.3705e-19	0.0263677	2.28261	2.80435
90.1	sp	P57721	PCBP3_HUMAN	Poly(rC)-binding protein 3 OS=Homo sapiens GN=PCBP3 PE=1 SV=2	22	50	57	39	163.53	0.000826196	6.14248e-05	0.498433	2.27273	2.59091
19.1	sp	Q58FF7	H90B3_HUMAN	Putative heat shock protein HSP 90-beta-3 OS=Homo sapiens GN=HSP90AB3P PE=5 SV=1	55	123	149	68	239.44	2.4392e-07	1.97665e-11	0.114638	2.23636	2.70909
36.1	sp	Q08211	DHX9_HUMAN	ATP-dependent RNA helicase A OS=Homo sapiens GN=DHX9 PE=1 SV=4	126	279	201	141	215.09	1.38163e-14	3.09932e-05	0.000359571	2.21429	1.59524
197.1	sp	P21108	PRPS3_HUMAN	Ribose-phosphate pyrophosphokinase 3 OS=Homo sapiens GN=PRPS1L1 PE=1 SV=2	15	33	37	35	122.06	0.00853401	0.00193796	0.632492	2.2	2.46667
64.1	sp	Q9Y6M1	IF2B2_HUMAN	Insulin-like growth factor 2 mRNA-binding protein 2 OS=Homo sapiens GN=IGF2BP2 PE=1 SV=2	10	22	30	66	46.91	0.031751	0.0012166	0.266307	2.2	3
45.1	sp	P48643	TCPE_HUMAN	T-complex protein 1 subunit epsilon OS=Homo sapiens GN=CCT5 PE=1 SV=1	84	184	186	60	380.66	6.28316e-10	3.26952e-10	0.917189	2.19048	2.21429
133.1	sp	P43243	MATR3_HUMAN	Matrin-3 OS=Homo sapiens GN=MATR3 PE=1 SV=2	35	76	66	95	93.59	8.2122e-05	0.00187283	0.401173	2.17143	1.88571
25.1	sp	P49368	TCPG_HUMAN	T-complex protein 1 subunit gamma OS=Homo sapiens GN=CCT3 PE=1 SV=4	141	306	294	60	612.43	2.84544e-15	1.21627e-13	0.624195	2.17021	2.08511
228.1	sp	P46781	RS9_HUMAN	40S ribosomal protein S9 OS=Homo sapiens GN=RPS9 PE=1 SV=3	18	39	49	23	234.74	0.00488339	0.000113082	0.285901	2.16667	2.72222
84.1	sp	P05141	ADT2_HUMAN	ADP/ATP translocase 2 OS=Homo sapiens GN=SLC25A5 PE=1 SV=7	52	112	108	33	414.23	2.13542e-06	7.65896e-06	0.787401	2.15385	2.07692
78.1	sp	Q14240	IF4A2_HUMAN	Eukaryotic initiation factor 4A-II OS=Homo sapiens GN=EIF4A2 PE=1 SV=2	28	60	73	46	173.59	0.000559107	5.17361e-06	0.259259	2.14286	2.60714
8.2	sp	Q9H853	TBA4B_HUMAN	Putative tubulin-like protein alpha-4B OS=Homo sapiens GN=TUBA4B PE=5 SV=2	70	147	146	28	659.17	1.25983e-07	1.7226e-07	0.953414	2.1	2.08571
220.1	sp	P15170	ERF3A_HUMAN	Eukaryotic peptide chain release factor GTP-binding subunit ERF3A OS=Homo sapiens GN=GSPT1 PE=1 SV=1	10	21	21	56	46.66	0.0457829	0.0457829	1	2.1	2.1
152.1	sp	P33176	KINH_HUMAN	Kinesin-1 heavy chain OS=Homo sapiens GN=KIF5B PE=1 SV=1	31	65	63	110	72.52	0.000451273	0.000856585	0.859681	2.09677	2.03226
30.1	sp	Q92526	TCPW_HUMAN	T-complex protein 1 subunit zeta-2 OS=Homo sapiens GN=CCT6B PE=1 SV=5	37	77	74	58	162.67	0.000152728	0.000391459	0.807119	2.08108	2
183.1	sp	Q5T9A4	ATD3B_HUMAN	ATPase family AAA domain-containing protein 3B OS=Homo sapiens GN=ATAD3B PE=1 SV=1	13	27	25	73	44.81	0.0252699	0.0495946	0.781485	2.07692	1.92308
4.1	sp	A6NKZ8	YI016_HUMAN	Putative tubulin beta chain-like protein ENSP00000290377 OS=Homo sapiens PE=5 SV=2	187	382	443	42	1212	1.47612e-16	4.24138e-25	0.0336102	2.04278	2.36898
27.1	sp	P78371	TCPB_HUMAN	T-complex protein 1 subunit beta OS=Homo sapiens GN=CCT2 PE=1 SV=4	140	285	277	57	610.93	1.20507e-12	1.27246e-11	0.735766	2.03571	1.97857
319.1	sp	P62249	RS16_HUMAN	40S ribosomal protein S16 OS=Homo sapiens GN=RPS16 PE=1 SV=2	14	28	25	16	203.82	0.0291764	0.0761568	0.680199	2	1.78571
195.1	sp	P29803	ODPAT_HUMAN	Pyruvate dehydrogenase E1 component subunit alpha, testis-specific form, mitochondrial OS=Homo sapiens GN=PDHA2 PE=1 SV=1	13	26	17	43	65.26	0.0355747	0.464544	0.168334	2	1.30769
19.1	sp	P07900	HS90A_HUMAN	Heat shock protein HSP 90-alpha OS=Homo sapiens GN=HSP90AA1 PE=1 SV=5	84	167	280	85	313.8	1.23232e-07	4.97817e-26	7.70713e-08	1.9881	3.33333
10.1	sp	P54652	HSP72_HUMAN	Heat shock-related 70 kDa protein 2 OS=Homo sapiens GN=HSPA2 PE=1 SV=1	54	106	109	70	192.2	3.34522e-05	1.35779e-05	0.837883	1.96296	2.01852
98.1	sp	Q15029	U5S1_HUMAN	116 kDa U5 small nuclear ribonucleoprotein component OS=Homo sapiens GN=EFTUD2 PE=1 SV=1	44	86	63	109	88.23	0.000201641	0.0655218	0.059025	1.95455	1.43182
244.1	sp	P30050	RL12_HUMAN	60S ribosomal protein L12 OS=Homo sapiens GN=RPL12 PE=1 SV=1	20	39	42	18	283.57	0.0125671	0.00473198	0.738854	1.95	2.1
64.1	sp	Q9NZI8	IF2B1_HUMAN	Insulin-like growth factor 2 mRNA-binding protein 1 OS=Homo sapiens GN=IGF2BP1 PE=1 SV=2	71	138	121	63	260.08	2.92923e-06	0.000284141	0.290645	1.94366	1.70423
19.1	sp	P08238	HS90B_HUMAN	Heat shock protein HSP 90-beta OS=Homo sapiens GN=HSP90AB1 PE=1 SV=4	157	304	389	83	510.74	4.96e-12	6.19585e-24	0.00122518	1.93631	2.47771
289.1	sp	Q9H9B4	SFXN1_HUMAN	Sideroflexin-1 OS=Homo sapiens GN=SFXN1 PE=1 SV=4	15	29	34	36	109.56	0.0332487	0.00595438	0.528517	1.93333	2.26667
26.1	sp	Q92841	DDX17_HUMAN	Probable ATP-dependent RNA helicase DDX17 OS=Homo sapiens GN=DDX17 PE=1 SV=1	117	226	216	72	386.44	2.90519e-09	4.59133e-08	0.634308	1.93162	1.84615
343.1	sp	P46778	RL21_HUMAN	60S ribosomal protein L21 OS=Homo sapiens GN=RPL21 PE=1 SV=2	13	25	24	19	167.08	0.0495946	0.0684321	0.886399	1.92308	1.84615
20.1	sp	P17987	TCPA_HUMAN	T-complex protein 1 subunit alpha OS=Homo sapiens GN=TCP1 PE=1 SV=1	169	322	297	60	653.33	3.33784e-12	2.40452e-09	0.314911	1.90533	1.7574
33.1	sp	Q99832	TCPH_HUMAN	T-complex protein 1 subunit eta OS=Homo sapiens GN=CCT7 PE=1 SV=2	134	252	242	59	529.24	1.40888e-09	2.03322e-08	0.652756	1.8806	1.80597
101.1	sp	O14979	HNRDL_HUMAN	Heterogeneous nuclear ribonucleoprotein D-like OS=Homo sapiens GN=HNRPDL PE=1 SV=3	40	75	82	46	212.24	0.00100245	0.000122157	0.57633	1.875	2.05
84.2	sp	P12235	ADT1_HUMAN	ADP/ATP translocase 1 OS=Homo sapiens GN=SLC25A4 PE=1 SV=4	32	60	63	33	234.53	0.00325552	0.00132783	0.786765	1.875	1.96875
41.1	sp	P31943	HNRH1_HUMAN	Heterogeneous nuclear ribonucleoprotein H OS=Homo sapiens GN=HNRNPH1 PE=1 SV=4	111	208	202	49	529.48	4.39343e-08	2.20696e-07	0.766983	1.87387	1.81982
246.1	sp	O94906	PRP6_HUMAN	Pre-mRNA-processing factor 6 OS=Homo sapiens GN=PRPF6 PE=1 SV=1	23	43	33	107	46.32	0.0130897	0.180278	0.250662	1.86957	1.43478
235.1	sp	P50914	RL14_HUMAN	60S ribosomal protein L14 OS=Homo sapiens GN=RPL14 PE=1 SV=4	23	43	37	23	219.92	0.0130897	0.0694076	0.502134	1.86957	1.6087
326.1	sp	O43615	TIM44_HUMAN	Mitochondrial import inner membrane translocase subunit TIM44 OS=Homo sapiens GN=TIMM44 PE=1 SV=2	15	28	23	51	64.3	0.0457058	0.192697	0.483489	1.86667	1.53333
22.1	sp	P50990	TCPQ_HUMAN	T-complex protein 1 subunit theta OS=Homo sapiens GN=CCT8 PE=1 SV=4	158	292	319	60	645.31	1.95223e-10	9.71613e-14	0.274622	1.8481	2.01899
10.1	sp	P34931	HS71L_HUMAN	Heat shock 70 kDa protein 1-like OS=Homo sapiens GN=HSPA1L PE=1 SV=2	137	252	257	70	459.25	4.2389e-09	1.10208e-09	0.824607	1.83942	1.87591
19.2	sp	Q58FF8	H90B2_HUMAN	Putative heat shock protein HSP 90-beta 2 OS=Homo sapiens GN=HSP90AB2P PE=1 SV=2	71	130	162	44	409.5	2.76037e-05	1.5232e-09	0.0608559	1.83099	2.28169
248.1	sp	P62269	RS18_HUMAN	40S ribosomal protein S18 OS=Homo sapiens GN=RPS18 PE=1 SV=3	22	40	36	18	276.7	0.0213033	0.0646881	0.646279	1.81818	1.63636
249.1	sp	Q9UMS4	PRP19_HUMAN	Pre-mRNA-processing factor 19 OS=Homo sapiens GN=PRPF19 PE=1 SV=1	25	45	28	55	88.85	0.0160747	0.680199	0.0456223	1.8	1.12
111.1	sp	P62424	RL7A_HUMAN	60S ribosomal protein L7a OS=Homo sapiens GN=RPL7A PE=1 SV=2	52	92	75	30	365.27	0.000792549	0.0407008	0.187959	1.76923	1.44231
49.1	sp	P09874	PARP1_HUMAN	Poly [ADP-ribose] polymerase 1 OS=Homo sapiens GN=PARP1 PE=1 SV=4	100	176	137	113	182.72	4.13685e-06	0.0160256	0.0272946	1.76	1.37
264.1	sp	P61956	SUMO2_HUMAN	Small ubiquitin-related modifier 2 OS=Homo sapiens GN=SUMO2 PE=1 SV=2	22	38	33	11	429.23	0.037695	0.136683	0.552755	1.72727	1.5
284.1	sp	Q5UIP0	RIF1_HUMAN	Telomere-associated protein RIF1 OS=Homo sapiens GN=RIF1 PE=1 SV=2	29	50	3	274	14.95	0.0174558	7.63103e-07	1.24364e-12	1.72414	0.103448
91.1	sp	P0CG47	UBB_HUMAN	Polyubiquitin-B OS=Homo sapiens GN=UBB PE=1 SV=1	51	87	126	26	512.68	0.00205379	1.01812e-08	0.00736677	1.70588	2.47059
91.1	sp	P0CG48	UBC_HUMAN	Polyubiquitin-C OS=Homo sapiens GN=UBC PE=1 SV=2	51	87	126	77	171.47	0.00205379	1.01812e-08	0.00736677	1.70588	2.47059
91.1	sp	P62979	RS27A_HUMAN	Ubiquitin-40S ribosomal protein S27a OS=Homo sapiens GN=RPS27A PE=1 SV=2	51	87	126	18	735.19	0.00205379	1.01812e-08	0.00736677	1.70588	2.47059
91.1	sp	P62987	RL40_HUMAN	Ubiquitin-60S ribosomal protein L40 OS=Homo sapiens GN=UBA52 PE=1 SV=2	51	87	126	15	896.74	0.00205379	1.01812e-08	0.00736677	1.70588	2.47059
165.1	sp	Q14839	CHD4_HUMAN	Chromodomain-helicase-DNA-binding protein 4 OS=Homo sapiens GN=CHD4 PE=1 SV=2	23	39	85	218	33.74	0.0409972	7.58951e-10	2.90469e-05	1.69565	3.69565
41.3	sp	P55795	HNRH2_HUMAN	Heterogeneous nuclear ribonucleoprotein H2 OS=Homo sapiens GN=HNRNPH2 PE=1 SV=1	62	105	102	49	273.19	0.000819049	0.00169352	0.834824	1.69355	1.64516
10.1	sp	P08107	HSP71_HUMAN	Heat shock 70 kDa protein 1A/1B OS=Homo sapiens GN=HSPA1A PE=1 SV=5	282	476	491	70	892.01	1.38248e-12	3.90114e-14	0.629538	1.68794	1.74113
95.1	sp	P05388	RLA0_HUMAN	60S acidic ribosomal protein P0 OS=Homo sapiens GN=RPLP0 PE=1 SV=1	57	96	99	34	367.85	0.00152205	0.000715548	0.829893	1.68421	1.73684
143.1	sp	P18124	RL7_HUMAN	60S ribosomal protein L7 OS=Homo sapiens GN=RPL7 PE=1 SV=1	37	62	70	29	289.3	0.0115283	0.00129799	0.486101	1.67568	1.89189
59.1	sp	P09651	ROA1_HUMAN	Heterogeneous nuclear ribonucleoprotein A1 OS=Homo sapiens GN=HNRNPA1 PE=1 SV=5	71	118	124	39	404.14	0.000588699	0.000133768	0.699708	1.66197	1.74648
195.1	sp	P08559	ODPA_HUMAN	Pyruvate dehydrogenase E1 component subunit alpha, somatic form, mitochondrial OS=Homo sapiens GN=PDHA1 PE=1 SV=3	29	48	47	43	143.29	0.029519	0.0380243	0.918281	1.65517	1.62069
59.1	sp	Q32P51	RA1L2_HUMAN	Heterogeneous nuclear ribonucleoprotein A1-like 2 OS=Homo sapiens GN=HNRNPA1L2 PE=2 SV=2	57	94	97	34	362.52	0.00247471	0.00118749	0.828148	1.64912	1.70175
62.1	sp	P11940	PABP1_HUMAN	Polyadenylate-binding protein 1 OS=Homo sapiens GN=PABPC1 PE=1 SV=2	81	133	126	71	240.7	0.000353564	0.00168805	0.663573	1.64198	1.55556
95.1	sp	Q8NHW5	RLA0L_HUMAN	60S acidic ribosomal protein P0-like OS=Homo sapiens GN=RPLP0P6 PE=5 SV=1	39	64	69	34	250.41	0.0132983	0.00366259	0.664575	1.64103	1.76923
172.1	sp	P21333	FLNA_HUMAN	Filamin-A OS=Homo sapiens GN=FLNA PE=1 SV=4	38	62	41	281	25.13	0.0158755	0.73569	0.0378507	1.63158	1.07895
198.1	sp	P61163	ACTZ_HUMAN	Alpha-centractin OS=Homo sapiens GN=ACTR1A PE=1 SV=1	31	50	42	43	144.41	0.0339229	0.197082	0.403952	1.6129	1.35484
42.1	sp	P14618	KPYM_HUMAN	Pyruvate kinase isozymes M1/M2 OS=Homo sapiens GN=PKM2 PE=1 SV=4	113	182	198	58	425.73	5.43656e-05	1.22997e-06	0.411701	1.61062	1.75221
105.1	sp	P68104	EF1A1_HUMAN	Elongation factor 1-alpha 1 OS=Homo sapiens GN=EEF1A1 PE=1 SV=1	53	84	94	50	230.49	0.00781355	0.000663626	0.453418	1.58491	1.77358
105.1	sp	Q5VTE0	EF1A3_HUMAN	Putative elongation factor 1-alpha-like 3 OS=Homo sapiens GN=EEF1A1P5 PE=5 SV=1	53	84	94	50	230.29	0.00781355	0.000663626	0.453418	1.58491	1.77358
10.1	sp	P11142	HSP7C_HUMAN	Heat shock cognate 71 kDa protein OS=Homo sapiens GN=HSPA8 PE=1 SV=1	299	470	514	71	905.37	5.92967e-10	3.31292e-14	0.160646	1.57191	1.71906
94.1	sp	P14866	HNRPL_HUMAN	Heterogeneous nuclear ribonucleoprotein L OS=Homo sapiens GN=HNRNPL PE=1 SV=2	58	91	104	64	197.37	0.00663327	0.000273575	0.351701	1.56897	1.7931
62.1	sp	Q13310	PABP4_HUMAN	Polyadenylate-binding protein 4 OS=Homo sapiens GN=PABPC4 PE=1 SV=1	32	50	52	71	94.71	0.0459458	0.0283287	0.843017	1.5625	1.625
126.1	sp	P26641	EF1G_HUMAN	Elongation factor 1-gamma OS=Homo sapiens GN=EEF1G PE=1 SV=3	44	68	76	50	187.67	0.0228095	0.0032932	0.504875	1.54545	1.72727
65.1	sp	Q12906	ILF3_HUMAN	Interleukin enhancer-binding factor 3 OS=Homo sapiens GN=ILF3 PE=1 SV=3	83	126	119	95	172.12	0.00283553	0.0110937	0.654699	1.51807	1.43373
85.1	sp	Q12905	ILF2_HUMAN	Interleukin enhancer-binding factor 2 OS=Homo sapiens GN=ILF2 PE=1 SV=2	67	101	103	43	314.85	0.00848228	0.00557881	0.888637	1.50746	1.53731
21.1	sp	P61978	HNRPK_HUMAN	Heterogeneous nuclear ribonucleoprotein K OS=Homo sapiens GN=HNRNPK PE=1 SV=1	193	290	288	51	756.69	9.48001e-06	1.387e-05	0.933701	1.50259	1.49223
55.1	sp	P40939	ECHA_HUMAN	Trifunctional enzyme subunit alpha, mitochondrial OS=Homo sapiens GN=HADHA PE=1 SV=2	94	140	149	83	230.87	0.00255345	0.000394707	0.59649	1.48936	1.58511
134.1	sp	P62701	RS4X_HUMAN	40S ribosomal protein S4, X isoform OS=Homo sapiens GN=RPS4X PE=1 SV=2	42	62	73	30	299.19	0.0491501	0.00362885	0.343509	1.47619	1.7381
26.1	sp	O00571	DDX3X_HUMAN	ATP-dependent RNA helicase DDX3X OS=Homo sapiens GN=DDX3X PE=1 SV=3	112	163	155	73	293.72	0.00204004	0.00835692	0.65369	1.45536	1.38393
101.1	sp	Q14103	HNRPD_HUMAN	Heterogeneous nuclear ribonucleoprotein D0 OS=Homo sapiens GN=HNRNPD PE=1 SV=1	62	90	90	38	315.01	0.0227503	0.0227503	1	1.45161	1.45161
34.1	sp	P46821	MAP1B_HUMAN	Microtubule-associated protein 1B OS=Homo sapiens GN=MAP1B PE=1 SV=2	190	269	163	270	114.99	0.000218502	0.1505	2.9583e-07	1.41579	0.857895
10.1	sp	P17066	HSP76_HUMAN	Heat shock 70 kDa protein 6 OS=Homo sapiens GN=HSPA6 PE=1 SV=2	81	110	129	71	225.4	0.0355155	0.000877822	0.218826	1.35802	1.59259
26.1	sp	O15523	DDX3Y_HUMAN	ATP-dependent RNA helicase DDX3Y OS=Homo sapiens GN=DDX3Y PE=1 SV=2	86	115	111	73	213.38	0.0404546	0.0744918	0.790175	1.33721	1.2907
