# Supplementary material for: MAP4K3 inhibits Sirtuin-1 to repress the LKB1–AMPK pathway to promote amino acid-dependent activation of the mTORC1 complex
Source: Life Sci Alliance. 2023 May 23;6(8):e202201525. doi: 10.26508/lsa.202201525 (PMC10205607; doi:10.26508/lsa.202201525)
Supplement: Supplementary file 2 [file LSA-2022-01525_Supplemental_Data_2.xlsx]

## Sheet: SIRT1 phospho_mass spec
Accession	Description	Sequence	Modifications	Phhos	Retention.Time	Ion.Score	53286 WTn Normalized	53287 WTn Normalized	53288 WTn Normalized	53289 WTp Normalized	53290 WTp Normalized	53291 WTp Normalized	53292 m4_6n Normalized	53293 m4_6n Normalized	53294 m4_6n Normalized	53295 m4_6p Normalized	53296 m4_6p Normalized	53297 m4_6p Normalized	53298_1 SPQC Normalized	53298_2 SPQC Normalized	53298_3 SPQC Normalized	53298_4 SPQC Normalized	WTn_CV	WTp_CV	m4_6n_CV	m4_6p_CV	SPQC_CV	m4_6n_v_WTn_FC	m4_6n_v_WTn_Pval	m4_6p_v_WTp_FC	m4_6p_v_WTp_Pval	WTp_v_WTn_FC	WTp_v_WTn_Pval	m4_6p_v_m4_6n_FC	m4_6p_v_m4_6n_Pval
Q96EB6	NAD-dependent protein deacetylase sirtuin-1 OS=Homo sapiens OX=9606 GN=SIRT1 PE=1 SV=2	TSPPDSSVIVTLLDQAAKSNDDLDVSESK	1xPhospho [S19(100)]	1	59.3	43	318111	234562	413965	245404	329158	307291	262845	244178	180284	179022	220211	200534	57849.8	43118.5	14722.7	8181.41	27.9	14.8	18.9	10.3	75.8	-1.41	0.186	-1.47	0.0292	-1.1	0.722	-1.15	0.401
Q96EB6	NAD-dependent protein deacetylase sirtuin-1 OS=Homo sapiens OX=9606 GN=SIRT1 PE=1 SV=2	TSPPDSSVIVTLLDQAAK	1xPhospho [S2(97.2)]	1	65.95	67	320105	302068	406938	322292	333845	292226	336746	245431	209985	178965	246255	233681	124576	121765	94127.5	84914.8	16.3	6.8	24.8	16.3	18.6	-1.3	0.187	-1.44	0.0486	-1.09	0.512	-1.2	0.371
Q96EB6	NAD-dependent protein deacetylase sirtuin-1 OS=Homo sapiens OX=9606 GN=SIRT1 PE=1 SV=2	ELAYLSELPPTPLHVSEDSSSPERTSPPDSSVIVTLLDQAAK	1xDeamidated [Q39]; 1xPhospho [S/T/Y]	1	67.33	27	34207	92560.2	2793.69	431810	3776.51	11012.5	194664	184211	66231.8	36722.6	3725.15	3392.19	6769.31	6377.42	5704.78	4927.59	105	165	48.1	131	13.6	3.44	0.208	-10.2	0.508	3.45	0.901	-10.2	0.0499
Q96EB6	NAD-dependent protein deacetylase sirtuin-1 OS=Homo sapiens OX=9606 GN=SIRT1 PE=1 SV=2	QEVTDMNYPSNKS	1xOxidation [M6]; 1xPhospho [S13(99.9)]	1	17.33	59	154112	235479	207604	172388	199398	195364	146779	173163	199120	180562	155391	170516	243373	251750	245837	268101	20.8	7.71	15.1	7.51	4.41	-1.15	0.442	-1.12	0.148	-1.05	0.796	-1.02	0.861
Q96EB6	NAD-dependent protein deacetylase sirtuin-1 OS=Homo sapiens OX=9606 GN=SIRT1 PE=1 SV=2	AGGAGFGTDGDDQEAINEAISVKQEVTDMNYPSNK	1xDeamidated [N/Q]; 1xPhospho [T8(100)] T	1	52.49	107	131332	32841.6	19757.9	25383.9	14748.8	4410.33	247720	4315.23	5896.33	155809	74677.5	15018	7775.79	6192.1	7674.25	6376.42	99.5	70.6	163	86.4	11.9	1.4	0.588	5.51	0.152	-4.13	0.162	-1.05	0.506
Q96EB6	NAD-dependent protein deacetylase sirtuin-1 OS=Homo sapiens OX=9606 GN=SIRT1 PE=1 SV=2	EAASSPAGEPLR	2xPhospho [S4(100); S5(100)]	1	23.01	21	66754.6	104909	112241	1.98204e+06	122681	148155	66129.2	69869.1	80469.7	43561.5	80775.7	75652.6	146343	143080	123913	149060	25.8	142	10.3	30.3	8.1	-1.31	0.262	-11.3	0.206	7.94	0.29	-1.08	0.633
Q96EB6	NAD-dependent protein deacetylase sirtuin-1 OS=Homo sapiens OX=9606 GN=SIRT1 PE=1 SV=2	AGGAGFGTDGDDQEAINEAISVKQEVTDMNYPSNK	1xPhospho [T8(100)]	1	52.07	122	80229.6	221102	199978	410590	395978	187470	208172	234255	181155	242791	137146	235297	44757.9	27293.9	17184.4	20382.4	45.5	37.7	12.8	28.7	44.9	1.24	0.447	-1.62	0.231	1.98	0.16	-1.01	0.856
Q96EB6	NAD-dependent protein deacetylase sirtuin-1 OS=Homo sapiens OX=9606 GN=SIRT1 PE=1 SV=2	NVESIAEQMENPDLK	1xOxidation [M9]; 1xPhospho [S4(100)]	1	32.83	105	309710	139617	142837	1.33294e+06	156661	145890	170747	129091	124823	75649.5	155353	130673	160062	183990	165630	173786	49.3	125	17.9	33.8	6.09	-1.39	0.418	-4.52	0.302	2.76	0.549	-1.17	0.479
Q96EB6	NAD-dependent protein deacetylase sirtuin-1 OS=Homo sapiens OX=9606 GN=SIRT1 PE=1 SV=2	TQKELAYLSELPPTPLHVSEDSSSPER	1xPhospho [S23(87.7)]	1	48.92	79	326766	624349	477573	283322	324041	147973	278801	390050	206796	518495	211240	455505	101578	172772	133802	74028.2	31.2	36.6	31.6	41.1	35.3	-1.63	0.136	1.57	0.308	-1.89	0.103	1.35	0.479
Q96EB6	NAD-dependent protein deacetylase sirtuin-1 OS=Homo sapiens OX=9606 GN=SIRT1 PE=1 SV=2	ELAYLSELPPTPLHVSEDSSSPER	2xPhospho [T11(100); S21(85.8)]	1	51.63	58	2.63316e+06	2.3673e+06	2.53377e+06	2.11093e+06	2.79582e+06	2.0892e+06	2.26789e+06	2.61896e+06	1.75354e+06	2.38726e+06	1.96858e+06	1.54643e+06	1.24486e+06	1.04131e+06	1.30546e+06	662217	5.35	17.2	19.7	21.4	27.3	-1.13	0.359	-1.19	0.331	-1.08	0.484	-1.13	0.524
Q96EB6	NAD-dependent protein deacetylase sirtuin-1 OS=Homo sapiens OX=9606 GN=SIRT1 PE=1 SV=2	NYTQNIDTLEQVAGIQR	1xPhospho [T3(99.9)]	1	51.08	75	114833	82892.8	239017	3.99293e+06	198317	162149	1.30429e+06	126919	127506	230412	125890	120264	69060.2	61704.7	58684.6	41385.7	56.7	152	131	39.1	20.3	3.57	0.448	-9.13	0.366	9.97	0.323	-3.27	0.524
Q96EB6	NAD-dependent protein deacetylase sirtuin-1 OS=Homo sapiens OX=9606 GN=SIRT1 PE=1 SV=2	EAASSPAGEPLRK	1xPhospho [S5(98.6)]	1	16.95	57	2.43567e+06	3.09379e+06	3.6669e+06	3.21407e+06	3.89949e+06	3.8991e+06	2.53195e+06	3.41055e+06	3.3379e+06	2.5731e+06	3.79586e+06	3.3458e+06	4.30256e+06	4.66746e+06	5.00006e+06	4.93954e+06	20.1	10.8	15.8	19.1	6.73	1.01	0.931	-1.13	0.379	1.2	0.252	1.05	0.794
Q96EB6	NAD-dependent protein deacetylase sirtuin-1 OS=Homo sapiens OX=9606 GN=SIRT1 PE=1 SV=2	AGGAGFGTDGDDQEAINEAISVKQEVTDMNYPSNKS	1xDeamidated [Q/N]; 1xPhospho [T8(100)]	1	52.74	71	39504.8	26561.2	17904.3	534297	14122.1	16623.1	26753.4	40550.4	5169.04	51582.5	4857.23	7520.4	11621.5	17022.5	26800.1	10801	38.8	159	73.8	123	44.5	-1.16	0.597	-8.83	0.382	6.73	0.649	-1.13	0.725
Q96EB6	NAD-dependent protein deacetylase sirtuin-1 OS=Homo sapiens OX=9606 GN=SIRT1 PE=1 SV=2	SNDDLDVSESKGCMEEKPQEVQTSR	1xCarbamidomethyl [C13]; 1xPhospho [S8(99.7)]	1	25.84	76	619619	238818	365577	1.75484e+07	373787	240358	1.51488e+06	126522	168553	563566	197190	159239	192532	243225	206632	139700	47.5	164	131	72.8	21.9	1.48	0.852	-19.7	0.388	14.8	0.498	-1.97	0.834
Q96EB6	NAD-dependent protein deacetylase sirtuin-1 OS=Homo sapiens OX=9606 GN=SIRT1 PE=1 SV=2	EAASSPAGEPLR	1xPhospho [S5(98.6)]	1	20.73	64	1.33335e+07	1.71591e+07	2.15562e+07	1.57845e+07	2.16188e+07	2.41988e+07	1.39657e+07	1.79962e+07	2.01445e+07	1.35475e+07	2.10277e+07	1.75671e+07	2.5584e+07	2.68613e+07	2.83465e+07	2.91186e+07	23.7	21	18.1	21.5	5.72	1	0.963	-1.18	0.408	1.18	0.414	1	0.983
Q96EB6	NAD-dependent protein deacetylase sirtuin-1 OS=Homo sapiens OX=9606 GN=SIRT1 PE=1 SV=2	SNDDLDVSESKGCMEEKPQEVQTSR	1xCarbamidomethyl [C13]; 1xDeamidated [Q/N]; 1xPhospho [S8(98.8)]	1	22.44	52	13500.4	10961.3	9952.24	120026	8241.73	31863.2	1.74284e+06	112703	40680.6	630145	31480.5	44335.3	97472.5	48890	57132.5	58856.7	15.9	110	152	145	33.1	55.1	0.124	4.41	0.417	4.65	0.317	-2.69	0.643
Q96EB6	NAD-dependent protein deacetylase sirtuin-1 OS=Homo sapiens OX=9606 GN=SIRT1 PE=1 SV=2	ELAYLSELPPTPLHVSEDSSSPER	4xPhospho [T11(100); S16(99.8); S20(81.6); S21(81.6)]	1	56.01	24	310723	22448.5	47066.9	106552	72298.1	56283.2	174827	48657.7	31940.4	88407.2	51809.5	44976.2	14567.1	19317.7	15415.6	14229.1	126	32.8	91.8	37.8	14.8	-1.49	0.95	-1.27	0.422	-1.62	0.918	-1.38	0.879
Q96EB6	NAD-dependent protein deacetylase sirtuin-1 OS=Homo sapiens OX=9606 GN=SIRT1 PE=1 SV=2	AGGAGFGTDGDDQEAINEAISVK	1xPhospho [T8(100)]	1	43.14	157	6.03288e+06	6.75839e+06	5.12367e+06	9.40459e+06	8.39899e+06	4.92802e+06	8.18506e+06	6.83023e+06	5.88705e+06	6.98351e+06	5.12858e+06	5.94194e+06	4.00447e+06	3.95684e+06	4.01935e+06	3.41552e+06	13.7	31	16.6	15.5	7.54	1.17	0.293	-1.26	0.43	1.27	0.414	-1.16	0.328
Q96EB6	NAD-dependent protein deacetylase sirtuin-1 OS=Homo sapiens OX=9606 GN=SIRT1 PE=1 SV=2	ELAYLSELPPTPLHVSEDSSSPERTSPPDSSVIVTLLDQAAK	1xPhospho [S26(49.2)]	1	67.33	55	1.11625e+07	2.00208e+06	4.8026e+06	1.33003e+07	1.04253e+07	6.02825e+06	1.22757e+07	6.81904e+06	2.0551e+06	1.09946e+07	6.50615e+06	5.10893e+06	930344	947858	997047	3.36744e+06	78.4	36.9	72.5	40.8	77.2	1.18	0.838	-1.32	0.445	1.66	0.305	1.07	0.693
Q96EB6	NAD-dependent protein deacetylase sirtuin-1 OS=Homo sapiens OX=9606 GN=SIRT1 PE=1 SV=2	RDGPGLERSPGEPGGAAPER	1xPhospho [S9(100)]	1	21.67	42	1.8551e+07	1.84072e+07	3.27914e+07	2.27559e+07	3.20735e+07	2.10361e+07	2.48841e+07	2.18612e+07	2.33155e+07	1.98643e+07	2.21875e+07	2.39598e+07	1.51725e+07	1.55548e+07	1.30673e+07	1.30662e+07	35.5	23.5	6.47	9.33	9.39	1	0.85	-1.15	0.447	1.09	0.675	-1.06	0.413
Q96EB6	NAD-dependent protein deacetylase sirtuin-1 OS=Homo sapiens OX=9606 GN=SIRT1 PE=1 SV=2	NVGSSTGEKNERTSVAGTVR	1xPhospho [T/S]	1	17.18	48	286340	758739	908232	195293	777413	421833	628361	551416	597198	522473	479252	762267	677241	652422	674251	703285	49.9	63.1	6.53	25.9	3.08	-1.1	0.969	1.26	0.465	-1.4	0.524	-1.01	0.87
Q96EB6	NAD-dependent protein deacetylase sirtuin-1 OS=Homo sapiens OX=9606 GN=SIRT1 PE=1 SV=2	TQKELAYLSELPPTPLHVSEDSSSPER	2xPhospho [T14(100); S19(93.2)]	1	48.64	36	51206	63394.4	43270.6	28036.1	9243.16	11240.5	20653.4	3646.33	8519.11	18303.8	5596.7	8851.1	7296.43	5541.53	7729.9	8837.99	19.3	63.8	80.1	60.5	18.6	-4.81	0.0635	-1.48	0.468	-3.25	0.0522	-1	0.86
Q96EB6	NAD-dependent protein deacetylase sirtuin-1 OS=Homo sapiens OX=9606 GN=SIRT1 PE=1 SV=2	SPGEPGGAAPER	1xPhospho [S1(100)]	1	15.2	82	7.60644e+06	1.53246e+07	1.62514e+07	7.86939e+06	1.53416e+07	1.75054e+07	7.88481e+06	1.18131e+07	1.28221e+07	7.62419e+06	1.11921e+07	1.23071e+07	1.78928e+07	1.77685e+07	1.90685e+07	1.94399e+07	36.3	37.3	24.1	23.6	4.52	-1.2	0.625	-1.31	0.473	1.04	0.921	-1.04	0.848
Q96EB6	NAD-dependent protein deacetylase sirtuin-1 OS=Homo sapiens OX=9606 GN=SIRT1 PE=1 SV=2	ELAYLSELPPTPLHVSEDSSSPERTSPPDSSVIVTLLDQAAK	1xDeamidated [Q39]; 4xPhospho [T11(53.7); S16(41.1); S20(39); S21(39.8)]	1	68.43	45	9937.51	26404.7	8750.75	38743.7	6445.95	7258.63	56313.6	4437.38	2144.87	22554.8	3990.7	2617.62	6262.27	8041.05	9333.45	7408.95	65.6	105	146	115	16.5	1.39	0.682	-1.8	0.482	1.16	0.914	-2.16	0.831
Q96EB6	NAD-dependent protein deacetylase sirtuin-1 OS=Homo sapiens OX=9606 GN=SIRT1 PE=1 SV=2	NERTSVAGTVRK	1xPhospho [T/S]	1	14.17	21	44590.3	130381	143284	72682.4	119811	96248.1	702145	93727.2	89179	39368	83654.4	117667	68560.5	106554	112904	79227.3	50.6	24.5	120	48.9	23.2	2.78	0.461	-1.2	0.524	-1.1	0.996	-3.68	0.319
Q96EB6	NAD-dependent protein deacetylase sirtuin-1 OS=Homo sapiens OX=9606 GN=SIRT1 PE=1 SV=2	SNDDLDVSESKGCMEEKPQEVQTSR	1xCarbamidomethyl [C13]; 1xDeamidated [Q]; 1xOxidation [M14]; 1xPhospho [S8(99.8)]	1	22.38	28	164317	173303	49194.2	393448	8040.14	27059.8	91135.4	15539.9	22640.5	47049	6416.89	18643.3	22619.3	33636.8	42050.4	64073.3	53.7	152	96.8	86.7	43.3	-2.99	0.141	-5.94	0.532	1.11	0.511	-1.79	0.503
Q96EB6	NAD-dependent protein deacetylase sirtuin-1 OS=Homo sapiens OX=9606 GN=SIRT1 PE=1 SV=2	AGGAGFGTDGDDQEAINEAISVKQEVTDMNYPSNKS	1xDeamidated [Q/N]; 1xOxidation [M29]; 1xPhospho [T8(100)]	1	44.88	80	179324	160912	54739.4	517829	68200	42224.2	82331.2	20697.1	61451	189891	35153.7	33310.6	27528.7	12021.8	14375.1	21059.4	51.1	128	57.2	104	37.3	-2.4	0.186	-2.43	0.547	1.59	0.984	1.57	0.743
Q96EB6	NAD-dependent protein deacetylase sirtuin-1 OS=Homo sapiens OX=9606 GN=SIRT1 PE=1 SV=2	NVESIAEQMENPDLK	1xPhospho [S4(100)]	1	45.97	97	68503.9	92644.4	121410	98057.5	109260	117266	426637	81396.3	111009	93321.8	81984.9	756575	50526.2	892316	109490	92865.1	28.1	8.92	92.7	124	141	2.19	0.405	2.87	0.553	1.15	0.432	1.51	0.886
Q96EB6	NAD-dependent protein deacetylase sirtuin-1 OS=Homo sapiens OX=9606 GN=SIRT1 PE=1 SV=2	ADEAALALQPGGSPSAAGADREAASSPAGEPLR	1xPhospho [S26(82.6)]	1	37.69	37	138658	52648.2	15968.5	758796	32125.1	25349.4	17788.8	22680.5	5792.54	84782.7	28787	23962.5	14635.1	21372.2	16524.3	12910.9	91.1	155	56.3	73.7	22.3	-4.48	0.169	-5.94	0.557	3.94	0.688	2.97	0.136
Q96EB6	NAD-dependent protein deacetylase sirtuin-1 OS=Homo sapiens OX=9606 GN=SIRT1 PE=1 SV=2	DGPGLERSPGEPGGAAPER	1xPhospho [S8(100)]	1	22.47	54	2.0928e+07	3.28315e+07	4.16617e+07	1.76192e+07	3.83366e+07	3.55878e+07	1.76427e+07	2.54467e+07	2.33983e+07	1.74414e+07	2.67143e+07	2.91639e+07	3.47716e+07	2.95598e+07	3.32119e+07	3.06191e+07	32.7	36.9	18.3	25.3	7.43	-1.44	0.24	-1.25	0.559	-1.04	0.865	1.1	0.683
Q96EB6	NAD-dependent protein deacetylase sirtuin-1 OS=Homo sapiens OX=9606 GN=SIRT1 PE=1 SV=2	NVESIAEQMENPDLKNVGSSTGEKNER	1xOxidation [M9]; 1xPhospho [S19(95.4)]	1	28.77	48	190615	91304.4	69178.5	98253.5	53148.6	17224.3	260840	50315.6	38089.8	253970	31339.8	48314.4	21416.5	23033.9	31649.2	22998.4	55.3	72.2	108	111	18.7	-1.01	0.693	1.98	0.586	-2.08	0.234	-1.05	0.925
Q96EB6	NAD-dependent protein deacetylase sirtuin-1 OS=Homo sapiens OX=9606 GN=SIRT1 PE=1 SV=2	ELAYLSELPPTPLHVSEDSSSPER	1xPhospho [S/Y/T]	1	52.25	84	1.51859e+07	1.16028e+07	1.17937e+07	1.38369e+07	1.40086e+07	1.14217e+07	1.6512e+07	1.40448e+07	1.14818e+07	1.34952e+07	1.1185e+07	1.27164e+07	6.71152e+06	6.09555e+06	5.72466e+06	4.37577e+06	15.7	11.1	17.9	9.43	17.3	1.09	0.579	-1.05	0.611	1.02	0.857	-1.12	0.426
Q96EB6	NAD-dependent protein deacetylase sirtuin-1 OS=Homo sapiens OX=9606 GN=SIRT1 PE=1 SV=2	ELAYLSELPPTPLHVSEDSSSPER	3xPhospho [T11(100); S19(95.9); S20(80.7)]	1	53.87	46	516198	521489	451236	786020	485112	406594	484896	415576	317887	842693	442151	193532	398305	277393	255024	185375	7.88	35.8	20.7	66.5	31.8	-1.22	0.219	-1.13	0.627	1.13	0.723	1.21	0.936
Q96EB6	NAD-dependent protein deacetylase sirtuin-1 OS=Homo sapiens OX=9606 GN=SIRT1 PE=1 SV=2	AGGAGFGTDGDDQEAINEAISVKQEVTDMNYPSNKS	1xPhospho [T8(100)]	1	51.92	112	311299	745793	606776	454281	827320	359808	676664	559297	370479	459411	289615	612151	113208	61151.5	31354.8	70666.5	40	45.2	28.8	35.6	49	-1.04	0.996	-1.21	0.636	-1.01	0.972	-1.18	0.556
Q96EB6	NAD-dependent protein deacetylase sirtuin-1 OS=Homo sapiens OX=9606 GN=SIRT1 PE=1 SV=2	NERTSVAGTVR	1xPhospho [S5(100)]	1	15.74	41	605644	870473	1.13485e+06	795949	1.10238e+06	1.0585e+06	695320	944159	976082	756491	961197	1.03264e+06	1.06987e+06	1.20027e+06	1.27968e+06	1.15257e+06	30.4	16.8	17.6	15.6	7.47	1	0.92	-1.08	0.637	1.13	0.531	1.05	0.731
Q96EB6	NAD-dependent protein deacetylase sirtuin-1 OS=Homo sapiens OX=9606 GN=SIRT1 PE=1 SV=2	AGGAGFGTDGDDQEAINEAISVK	1xDeamidated [Q/N]; 1xPhospho [T8(100)]	1	37.7	126	86700.5	257570	195763	70102.9	188814	319556	51457.2	245374	222591	157396	244488	226112	96885.3	155001	215638	93522.7	48.1	64.7	61.2	21.9	41.1	-1.04	0.821	1.09	0.649	1.07	0.985	1.21	0.538
Q96EB6	NAD-dependent protein deacetylase sirtuin-1 OS=Homo sapiens OX=9606 GN=SIRT1 PE=1 SV=2	ELAYLSELPPTPLHVSEDSSSPERTSPPDSSVIVTLLDQAAK	4xPhospho [T11(88.7); S16(79.4); S20(56.6); S21(62.8)]	1	67.74	55	1.60789e+06	409321	248652	2.30916e+06	2.3315e+06	484390	1.1358e+06	947607	227083	4.99049e+06	685001	130045	100741	548784	245738	398459	98.3	62.1	62.3	137	59.8	1.02	0.868	1.13	0.651	2.26	0.294	2.51	0.876
Q96EB6	NAD-dependent protein deacetylase sirtuin-1 OS=Homo sapiens OX=9606 GN=SIRT1 PE=1 SV=2	NVGSSTGEKNER	1xPhospho [S4(91.5)]	1	12.87	39	323633	412887	495923	192055	425329	590395	382969	317704	374104	307102	216621	411570	735282	516628	493879	672946	21	49.7	9.88	31.3	19.5	-1.15	0.431	-1.29	0.654	-1.02	0.788	-1.15	0.462
Q96EB6	NAD-dependent protein deacetylase sirtuin-1 OS=Homo sapiens OX=9606 GN=SIRT1 PE=1 SV=2	AGGAGFGTDGDDQEAINEAISVKQEVTDMNYPSNK	1xOxidation [M29]; 1xPhospho [T8(100)]	1	48.3	95	370775	436992	282336	219626	408235	197797	327735	341480	253864	369322	206393	348013	104957	65421.8	26800.1	17838.5	21.4	42	15.3	28.8	74.2	-1.18	0.376	1.12	0.671	-1.32	0.307	1	0.919
Q96EB6	NAD-dependent protein deacetylase sirtuin-1 OS=Homo sapiens OX=9606 GN=SIRT1 PE=1 SV=2	QEVTDMNYPSNKS	1xPhospho [S13(91.3)]	1	23.89	47	69856.9	228778	273996	94973.6	268122	288814	98162.3	220116	246781	98385.5	185949	223596	310805	302411	328945	302922	56.2	49	42.1	37.9	3.98	-1.01	0.906	-1.28	0.68	1.14	0.773	-1.11	0.829
Q96EB6	NAD-dependent protein deacetylase sirtuin-1 OS=Homo sapiens OX=9606 GN=SIRT1 PE=1 SV=2	SNDDLDVSESKGCMEEKPQEVQTSR	1xCarbamidomethyl [C13]; 1xOxidation [M14]; 1xPhospho [S8(99.9)]	1	22.03	66	2.15895e+06	381365	337650	82108.8	435138	299922	1.02597e+06	159465	164061	573625	160704	233596	255681	240741	270529	201739	108	65.4	111	68.3	12.2	-2.13	0.416	1.18	0.732	-3.52	0.24	-1.39	0.925
Q96EB6	NAD-dependent protein deacetylase sirtuin-1 OS=Homo sapiens OX=9606 GN=SIRT1 PE=1 SV=2	ELAYLSELPPTPLHVSEDSSSPERTSPPDSSVIVTLLDQAAK	1xDeamidated [Q39]; 3xPhospho [T11(92.4); S16(65.2); S21(47.7)]	1	68.32	41	21536.7	11042.8	6348.53	39519	8433.27	3975.39	74437.4	14069.3	6591.37	55508	2998.8	3006.07	7779.31	4240.8	6868.54	8460.34	59.9	112	117	148	27.1	2.44	0.572	1.18	0.799	1.33	0.958	-1.55	0.512
Q96EB6	NAD-dependent protein deacetylase sirtuin-1 OS=Homo sapiens OX=9606 GN=SIRT1 PE=1 SV=2	ELAYLSELPPTPLHVSEDSSSPERTSPPDSSVIVTLLDQAAK	2xPhospho [S16(52.4); S19(52.4)]	1	67.48	57	5.71203e+06	1.39254e+06	2.75538e+06	7.54597e+06	5.87574e+06	2.50286e+06	7.33101e+06	3.81377e+06	1.23111e+06	9.46889e+06	3.06233e+06	2.49797e+06	552777	1.00961e+06	707087	1.89957e+06	67.2	48.4	74.2	77.3	57.8	1.26	0.832	-1.06	0.803	1.62	0.365	1.21	0.729
Q96EB6	NAD-dependent protein deacetylase sirtuin-1 OS=Homo sapiens OX=9606 GN=SIRT1 PE=1 SV=2	ELAYLSELPPTPLHVSEDSSSPERTSPPDSSVIVTLLDQAAK	3xPhospho [S19(54.9); S20(52.2); S21(52.2)]	1	67.62	50	1.07386e+06	1.19812e+06	1.03678e+06	5.23982e+06	4.03159e+06	1.24278e+06	3.99069e+06	2.27957e+06	702342	8.42509e+06	1.55515e+06	1.09722e+06	323222	927250	518296	990687	7.66	58.5	70.8	111	46.7	2.11	0.415	1.05	0.808	3.18	0.153	1.59	0.756
Q96EB6	NAD-dependent protein deacetylase sirtuin-1 OS=Homo sapiens OX=9606 GN=SIRT1 PE=1 SV=2	SPGEPGGAAPEREVPAAAR	1xPhospho [S1(100)]	1	23.39	33	132099	639500	458081	87548.9	281126	191668	96463.5	224493	163504	150557	107803	379169	219651	253068	244418	190602	62.7	51.9	39.7	68.7	12.4	-2.54	0.236	1.14	0.87	-2.19	0.307	1.32	0.706
Q96EB6	NAD-dependent protein deacetylase sirtuin-1 OS=Homo sapiens OX=9606 GN=SIRT1 PE=1 SV=2	TQKELAYLSELPPTPLHVSEDSSSPER	1xDeamidated [Q2]; 1xPhospho [S/T/Y]	1	46.28	73	2.60253e+06	225499	212635	264230	59351.5	115097	61997.3	201169	76988.9	238635	48290.3	116862	70563.3	84889.6	50153.1	14715.7	136	72.4	67.4	71.6	55.3	-8.94	0.178	-1.09	0.885	-6.93	0.226	1.19	0.857
Q96EB6	NAD-dependent protein deacetylase sirtuin-1 OS=Homo sapiens OX=9606 GN=SIRT1 PE=1 SV=2	AGGAGFGTDGDDQEAINEAISVKQEVTDMNYPSNKS	1xOxidation [M29]; 1xPhospho [T8(100)]	1	48.17	97	930574	1.90188e+06	820737	1.04355e+06	921781	497164	1.47741e+06	910863	580013	1.07088e+06	490115	1.03811e+06	283992	273318	164828	160210	48.9	34.9	45.9	37.7	30.5	-1.23	0.611	1.06	0.905	-1.48	0.348	-1.14	0.763
Q96EB6	NAD-dependent protein deacetylase sirtuin-1 OS=Homo sapiens OX=9606 GN=SIRT1 PE=1 SV=2	DNLLFGDEIITNGFHSCESDEEDR	1xCarbamidomethyl [C17]; 1xDeamidated [N12]; 1xPhospho [S19(86)]	1	53.87	39	288221	233158	140122	406049	443799	264048	138940	398484	262312	541558	357451	237144	68178.3	99439.4	58860.1	18763.7	33.9	25.5	48.7	40.5	54.2	1.21	0.721	1.02	0.969	1.68	0.119	1.42	0.382
Q96EB6	NAD-dependent protein deacetylase sirtuin-1 OS=Homo sapiens OX=9606 GN=SIRT1 PE=1 SV=2	ELAYLSELPPTPLHVSEDSSSPER		0	49.82	76	6.22777e+07	4.45987e+07	5.20936e+07	5.2198e+07	5.2688e+07	5.03789e+07	6.70468e+07	7.28173e+07	6.88985e+07	6.06827e+07	7.93262e+07	7.70322e+07	2.89619e+07	2.98385e+07	2.25345e+07	1.13543e+07	16.7	2.35	4.23	14.1	36.8	1.31	0.0924	1.4	0.0574	-1.02	0.895	1.04	0.744
Q96EB6	NAD-dependent protein deacetylase sirtuin-1 OS=Homo sapiens OX=9606 GN=SIRT1 PE=1 SV=2	LSEITEKPPR		0	19.93	72	3.74457e+08	4.1633e+08	3.62122e+08	3.21714e+08	3.09358e+08	3.3439e+08	3.10305e+08	3.15489e+08	3.31984e+08	3.44219e+08	3.4893e+08	3.47308e+08	4.01309e+08	4.26587e+08	4.62211e+08	4.84817e+08	7.39	3.89	3.55	0.69	8.35	-1.2	0.0312	1.08	0.0744	-1.19	0.0333	1.09	0.0501
Q96EB6	NAD-dependent protein deacetylase sirtuin-1 OS=Homo sapiens OX=9606 GN=SIRT1 PE=1 SV=2	EIYPGQFQPSLCHK	1xCarbamidomethyl [C12]	0	35.49	55	1.60947e+08	1.1428e+08	9.8313e+07	1.14634e+08	1.34836e+08	1.02922e+08	1.25168e+08	1.42133e+08	1.36732e+08	1.59145e+08	1.35127e+08	1.41535e+08	7.4838e+07	9.43238e+07	8.00955e+07	5.15958e+07	26.1	13.7	6.44	8.56	23.6	1.08	0.572	1.24	0.0922	-1.06	0.813	1.08	0.295
Q96EB6	NAD-dependent protein deacetylase sirtuin-1 OS=Homo sapiens OX=9606 GN=SIRT1 PE=1 SV=2	GCPGAAAAALWR	1xCarbamidomethyl [C2]	0	38.79	77	8.55669e+07	7.78197e+07	6.90936e+07	9.06043e+07	9.89226e+07	9.66618e+07	9.469e+07	1.14897e+08	7.68242e+07	1.06014e+08	1.03215e+08	9.77614e+07	7.86726e+07	8.72398e+07	8.60405e+07	7.63951e+07	10.6	4.51	20	4.1	6.53	1.23	0.226	1.07	0.119	1.23	0.0596	1.07	0.555
Q96EB6	NAD-dependent protein deacetylase sirtuin-1 OS=Homo sapiens OX=9606 GN=SIRT1 PE=1 SV=2	CPADEPLAIMKPEIVFFGENLPEQFHR	1xCarbamidomethyl [C1]; 1xOxidation [M10]	0	59.53	96	1.178e+07	4.42609e+06	1.90016e+07	2.07082e+07	2.05254e+07	1.38203e+07	2.9454e+07	1.69499e+07	5.32664e+06	1.41327e+07	5.61509e+06	1.0737e+07	1.41279e+06	1.15681e+06	942757	5.91419e+06	62.1	21.4	70	42.2	101	1.47	0.646	-1.81	0.128	1.56	0.299	-1.7	0.554
Q96EB6	NAD-dependent protein deacetylase sirtuin-1 OS=Homo sapiens OX=9606 GN=SIRT1 PE=1 SV=2	IGPYTFVQQHLMIGTDPR	2xDeamidated [Q8; Q9]	0	67.46	19	99989	17930.3	11271	3.84946e+06	86202.9	53616.3	21164.2	6792.87	29751.1	43970	5244.79	5635.01	7628.2	5040.87	9690.9	7532.73	115	164	60.3	122	25.5	-2.24	0.558	-72.7	0.128	30.9	0.233	-1.05	0.661
Q96EB6	NAD-dependent protein deacetylase sirtuin-1 OS=Homo sapiens OX=9606 GN=SIRT1 PE=1 SV=2	QEVTDMNYPSNKS	1xDeamidated [Q/N]	0	23.08	50	648242	1.03327e+06	1.35566e+06	1.27462e+06	1.54179e+06	1.71849e+06	863598	1.40592e+06	1.73285e+06	960085	1.29107e+06	1.2809e+06	1.90895e+06	1.86545e+06	1.90747e+06	1.89042e+06	35	14.8	32.9	16	1.07	1.32	0.401	-1.28	0.128	1.49	0.169	-1.13	0.71
Q96EB6	NAD-dependent protein deacetylase sirtuin-1 OS=Homo sapiens OX=9606 GN=SIRT1 PE=1 SV=2	NVESIAEQMENPDLKNVGSSTGEK	1xOxidation [M9]	0	29.62	95	1.3486e+07	1.9567e+07	1.50388e+07	7.01281e+06	1.36951e+07	6.56112e+06	5.69255e+06	1.47286e+07	6.84559e+06	1.35995e+07	1.09421e+07	1.70474e+07	1.13407e+07	6.79434e+06	7.58506e+06	6.16838e+06	19.7	43.9	54.1	22.1	29.1	-1.76	0.145	1.53	0.178	-1.76	0.104	1.53	0.225
Q96EB6	NAD-dependent protein deacetylase sirtuin-1 OS=Homo sapiens OX=9606 GN=SIRT1 PE=1 SV=2	IGPYTFVQQHLMIGTDPR	1xOxidation [M12]	0	52.18	100	2.99404e+07	1.49525e+07	3.24508e+07	3.15108e+07	3.73585e+07	4.58881e+07	4.16746e+07	3.03557e+07	2.84906e+07	2.38444e+07	3.09888e+07	3.47959e+07	7.98075e+06	2.0123e+06	1.11662e+06	4.46502e+06	36.7	18.9	21.3	18.6	78.9	1.3	0.351	-1.28	0.188	1.48	0.21	-1.12	0.526
Q96EB6	NAD-dependent protein deacetylase sirtuin-1 OS=Homo sapiens OX=9606 GN=SIRT1 PE=1 SV=2	NVESIAEQMENPDLKNVGSSTGEKNER	1xOxidation [M9]	0	28.47	120	1.27523e+07	2.57981e+07	1.82811e+07	5.96679e+06	1.50989e+07	9.51766e+06	1.04859e+07	1.52724e+07	1.21069e+07	1.76848e+07	1.00006e+07	2.72575e+07	9.26103e+06	7.91686e+06	8.52832e+06	7.22276e+06	34.6	45.2	19.3	47.2	10.6	-1.5	0.199	1.8	0.219	-1.86	0.131	1.45	0.411
Q96EB6	NAD-dependent protein deacetylase sirtuin-1 OS=Homo sapiens OX=9606 GN=SIRT1 PE=1 SV=2	NVGSSTGEKNERTSVAGTVR	1xDeamidated [N10]	0	18.97	33	24976	60888.6	58786	1.36851e+06	83852	67727.3	660968	25736.2	46999.5	63751.1	13299.6	64513.4	18138.5	46860.3	29319.9	11559.6	41.8	147	148	62.2	58.3	5.07	0.545	-10.7	0.228	10.5	0.261	-5.18	0.485
Q96EB6	NAD-dependent protein deacetylase sirtuin-1 OS=Homo sapiens OX=9606 GN=SIRT1 PE=1 SV=2	IGPYTFVQQHLMIGTDPRTILK		0	67.18	20	73362.2	16584.7	60468.4	66531.1	106583	44442.4	210851	40607.4	33948.8	58048	25394.1	48423.4	15435.2	27391.7	7750.24	49132.4	59.4	43.4	105	38.2	72.4	1.9	0.574	-1.65	0.237	1.45	0.427	-2.16	0.518
Q96EB6	NAD-dependent protein deacetylase sirtuin-1 OS=Homo sapiens OX=9606 GN=SIRT1 PE=1 SV=2	CPADEPLAIMKPEIVFFGENLPEQFHR	1xCarbamidomethyl [C1]; 1xDeamidated [Q/N]; 1xOxidation [M10]	0	62.46	74	1.25216e+06	1.31268e+06	1.97085e+06	3.86756e+06	1.12777e+06	2.00098e+06	4.37183e+06	682278	781249	1.27994e+06	96624.4	1.29295e+06	264888	266911	224715	90845.7	26.4	60	108	77.2	39.2	1.29	0.873	-2.62	0.259	1.54	0.461	-2.19	0.448
Q96EB6	NAD-dependent protein deacetylase sirtuin-1 OS=Homo sapiens OX=9606 GN=SIRT1 PE=1 SV=2	SNDDLDVSESKGCMEEKPQEVQTSR	1xCarbamidomethyl [C13]; 1xOxidation [M14]	0	21.31	90	2.95609e+07	3.80769e+07	3.13879e+07	1.85413e+07	3.17113e+07	2.39486e+07	1.9136e+07	3.17423e+07	2.61838e+07	2.72643e+07	3.00957e+07	3.49755e+07	2.29504e+07	2.78672e+07	2.82638e+07	1.80533e+07	13.6	26.8	24.6	12.7	19.8	-1.29	0.207	1.24	0.264	-1.33	0.177	1.2	0.319
Q96EB6	NAD-dependent protein deacetylase sirtuin-1 OS=Homo sapiens OX=9606 GN=SIRT1 PE=1 SV=2	GDIFNQVVPR	2xDeamidated [N5; Q6]	0	38.14	39	242809	235887	312844	2.03796e+07	634512	309350	125354	399608	299669	111149	381464	269355	126702	323456	317246	337478	16.1	162	50.5	53.5	36.2	1.04	0.883	-28	0.267	26.9	0.298	-1.08	0.866
Q96EB6	NAD-dependent protein deacetylase sirtuin-1 OS=Homo sapiens OX=9606 GN=SIRT1 PE=1 SV=2	AGGAGFGTDGDDQEAINEAISVKQEVTDMNYPSNKS	2xDeamidated [Q/N]	0	42.32	63	17281.5	125533	11999.8	120772	66156.5	63675.1	65686.8	10214.6	4907.32	148461	3222.95	3520.5	21269.4	28660	26838.4	11387.5	124	38.6	125	162	35.2	-1.92	0.552	-1.61	0.269	1.62	0.306	1.92	0.889
Q96EB6	NAD-dependent protein deacetylase sirtuin-1 OS=Homo sapiens OX=9606 GN=SIRT1 PE=1 SV=2	EPPLADNLYDEDDDDEGEEEEEAAAAAIGYR	1xDeamidated [N7]	0	67.24	75	457226	135663	528685	832837	447751	524257	732751	205698	178877	495970	322301	496974	530047	413108	467702	255914	56	33.9	83.9	22.9	28.2	-1	0.922	-1.37	0.275	1.61	0.303	1.18	0.512
Q96EB6	NAD-dependent protein deacetylase sirtuin-1 OS=Homo sapiens OX=9606 GN=SIRT1 PE=1 SV=2	YKVDCEAVR	1xCarbamidomethyl [C5]	0	18.67	61	1.44287e+08	8.26708e+07	7.42916e+07	9.79079e+07	9.58577e+07	6.67293e+07	8.44268e+07	9.50397e+07	8.15434e+07	1.20018e+08	1.01321e+08	9.09002e+07	6.91156e+07	8.71916e+07	9.02018e+07	7.03777e+07	38.1	20.1	8.17	14.2	13.9	-1.15	0.675	1.2	0.281	-1.16	0.661	1.2	0.152
Q96EB6	NAD-dependent protein deacetylase sirtuin-1 OS=Homo sapiens OX=9606 GN=SIRT1 PE=1 SV=2	IGPYTFVQQHLMIGTDPR		0	56.39	79	8.3358e+06	3.44653e+06	1.33119e+07	9.55494e+06	2.1975e+07	1.76801e+07	1.25732e+07	1.05616e+07	8.86387e+06	9.6516e+06	1.01253e+07	1.28099e+07	1.73911e+06	812256	537601	1.85444e+06	59	38.5	17.4	15.7	53.3	1.28	0.446	-1.51	0.281	1.96	0.194	1.02	0.885
Q96EB6	NAD-dependent protein deacetylase sirtuin-1 OS=Homo sapiens OX=9606 GN=SIRT1 PE=1 SV=2	SPGEPGGAAPEREVPAAAR		0	22.48	78	5.7324e+06	1.10071e+07	9.24063e+06	1.38297e+06	4.99863e+06	4.66155e+06	2.52813e+06	6.29792e+06	4.12506e+06	5.70357e+06	3.71366e+06	1.05999e+07	4.86786e+06	4.90923e+06	4.67749e+06	3.71994e+06	31	54.3	43.8	53.1	12.3	-2.01	0.0965	1.81	0.284	-2.35	0.132	1.55	0.368
Q96EB6	NAD-dependent protein deacetylase sirtuin-1 OS=Homo sapiens OX=9606 GN=SIRT1 PE=1 SV=2	GCMEEKPQEVQTSRNVESIAEQMENPDLK	1xCarbamidomethyl [C2]; 1xDeamidated [Q8]; 1xOxidation [M23]	0	32.69	28	11450.9	13160.7	31022.8	212742	42066.7	31835.8	512358	41657.7	24896.5	52192.1	21003.9	19760.4	20948.8	23427	15871.6	19035.4	58.5	106	143	59.3	16.1	10.4	0.228	-3.08	0.289	5.15	0.132	-6.23	0.374
Q96EB6	NAD-dependent protein deacetylase sirtuin-1 OS=Homo sapiens OX=9606 GN=SIRT1 PE=1 SV=2	TSPPDSSVIVTLLDQAAK		0	61.21	114	2.81899e+08	2.85278e+08	2.41036e+08	2.24413e+08	2.22294e+08	2.52301e+08	2.70936e+08	2.75897e+08	2.56959e+08	2.39829e+08	2.55617e+08	2.43982e+08	1.44338e+08	1.42886e+08	1.0456e+08	4.76324e+07	9.14	7.19	3.67	3.32	41.3	-1.01	0.962	1.06	0.295	-1.16	0.107	-1.09	0.0441
Q96EB6	NAD-dependent protein deacetylase sirtuin-1 OS=Homo sapiens OX=9606 GN=SIRT1 PE=1 SV=2	FIALSDKEGK		0	24.79	73	1.03883e+08	6.84442e+07	8.67537e+07	7.10458e+07	8.51322e+07	7.12566e+07	6.57943e+07	8.13692e+07	7.44035e+07	7.35298e+07	8.72785e+07	9.34618e+07	6.78674e+07	7.37067e+07	7.66344e+07	6.41179e+07	20.5	10.6	10.6	12	8	-1.17	0.362	1.12	0.304	-1.14	0.442	1.15	0.223
Q96EB6	NAD-dependent protein deacetylase sirtuin-1 OS=Homo sapiens OX=9606 GN=SIRT1 PE=1 SV=2	SPGEPGGAAPER		0	14.68	32	2.15713e+08	2.5316e+08	2.56135e+08	2.14982e+08	2.38132e+08	2.64124e+08	2.13789e+08	2.65995e+08	3.00363e+08	2.25081e+08	3.00323e+08	3.03273e+08	3.20209e+08	3.54379e+08	3.91666e+08	3.92063e+08	9.32	10.3	16.8	16	9.45	1.08	0.598	1.16	0.305	-1.01	0.896	1.06	0.685
Q96EB6	NAD-dependent protein deacetylase sirtuin-1 OS=Homo sapiens OX=9606 GN=SIRT1 PE=1 SV=2	QEVTDMNYPSNK		0	22.49	62	6.88583e+06	6.72968e+06	1.0529e+07	9.90006e+06	1.42726e+07	1.51645e+07	8.92772e+06	1.17583e+07	1.45988e+07	8.11415e+06	1.33636e+07	1.01263e+07	1.59977e+07	1.51543e+07	1.6257e+07	1.59505e+07	26.7	21.5	24.1	25.1	3.01	1.46	0.134	-1.24	0.32	1.63	0.0672	-1.12	0.613
Q96EB6	NAD-dependent protein deacetylase sirtuin-1 OS=Homo sapiens OX=9606 GN=SIRT1 PE=1 SV=2	EPLPHLHFDVELLGDCDVIINELCHR	2xCarbamidomethyl [C16; C24]	0	79.11	17	26018.6	149448	7563.2	480682	24424.3	654257	121311	33150.2	45144.3	238749	7814.17	33893	34794.9	50108.7	74986	12960.1	126	84.2	71.9	135	60.4	1.09	0.572	-4.13	0.33	6.33	0.247	1.41	0.766
Q96EB6	NAD-dependent protein deacetylase sirtuin-1 OS=Homo sapiens OX=9606 GN=SIRT1 PE=1 SV=2	TSVAGTVR		0	15.16	32	3.15957e+08	4.22358e+08	3.49882e+08	3.12714e+08	2.61213e+08	3.53089e+08	3.08112e+08	3.57715e+08	3.51145e+08	3.20515e+08	1.87989e+08	2.59949e+08	4.46746e+08	4.38489e+08	4.20278e+08	5.43115e+08	15	14.9	7.95	25.9	11.9	-1.07	0.564	-1.21	0.333	-1.17	0.259	-1.32	0.184
Q96EB6	NAD-dependent protein deacetylase sirtuin-1 OS=Homo sapiens OX=9606 GN=SIRT1 PE=1 SV=2	RKDINTIEDAVK	1xDeamidated [N5]	0	29.13	41	551001	365789	292412	388947	292724	143508	227879	290257	268852	282226	315364	2.03933e+06	301657	295188	236802	209462	33.1	45	12.1	114	17.2	-1.54	0.153	3.2	0.343	-1.47	0.3	3.35	0.351
Q96EB6	NAD-dependent protein deacetylase sirtuin-1 OS=Homo sapiens OX=9606 GN=SIRT1 PE=1 SV=2	FIALSDKEGKLLR		0	40.61	48	103167	289395	290721	179592	334437	172470	202285	192598	249194	186958	441529	362818	81778	66430.3	32318.7	60615	47.4	40	14.1	39.4	34.3	-1.06	0.925	1.44	0.355	1	0.893	1.54	0.283
Q96EB6	NAD-dependent protein deacetylase sirtuin-1 OS=Homo sapiens OX=9606 GN=SIRT1 PE=1 SV=2	LLRNYTQNIDTLEQVAGIQR		0	54.49	50	276744	23076	124579	40007.2	183039	149090	425017	166126	72892.8	32824.4	41833.9	116325	6754.46	5270.33	6543.11	7662.93	90.3	60.2	82.4	72	15	1.56	0.528	-1.95	0.358	-1.14	0.911	-3.48	0.15
Q96EB6	NAD-dependent protein deacetylase sirtuin-1 OS=Homo sapiens OX=9606 GN=SIRT1 PE=1 SV=2	AGGAGFGTDGDDQEAINEAISVKQEVTDMNYPSNKS	1xDeamidated [N/Q]; 1xOxidation [M29]	0	48.11	123	1.5877e+06	752597	742867	2.25353e+06	2.85467e+06	1.07354e+06	1.64457e+06	3.07811e+06	1.14654e+06	795076	662907	2.56441e+06	679906	425096	607933	238655	47.2	44	51.3	79.2	40.5	1.9	0.178	-1.54	0.358	2.01	0.154	-1.46	0.404
Q96EB6	NAD-dependent protein deacetylase sirtuin-1 OS=Homo sapiens OX=9606 GN=SIRT1 PE=1 SV=2	LSEITEKPPRTQK	1xDeamidated [Q12]	0	18.91	25	197867	414345	534063	164467	393881	360283	318296	352601	514685	269241	433461	622509	374509	453985	412140	440477	44.6	40.5	26.5	40	8.36	1.03	0.799	1.44	0.363	-1.25	0.634	1.12	0.803
Q96EB6	NAD-dependent protein deacetylase sirtuin-1 OS=Homo sapiens OX=9606 GN=SIRT1 PE=1 SV=2	NVESIAEQMENPDLK	2xDeamidated [Q8; N11]; 1xOxidation [M9]	0	41.87	21	10080.9	19195.3	7648.55	45995.9	14666.4	7038.08	25727.6	11853	6077	17809.9	9167.99	2606.96	9562.71	15515.9	10849.7	32369.2	49.5	91.5	69.4	77.3	61.6	1.18	0.889	-2.29	0.364	1.83	0.571	-1.48	0.526
Q96EB6	NAD-dependent protein deacetylase sirtuin-1 OS=Homo sapiens OX=9606 GN=SIRT1 PE=1 SV=2	VRPVALIPSSIPHEVPQILINR		0	66.96	87	1.10831e+08	2.11184e+07	7.99485e+07	1.0882e+08	7.02676e+07	6.50057e+07	1.90099e+08	6.35922e+07	2.75592e+07	7.31117e+07	4.44061e+07	7.56028e+07	9.07609e+06	4.089e+06	4.6295e+06	4.12788e+07	64.5	29.4	91.1	26.9	121	1.33	0.812	-1.26	0.374	1.15	0.593	-1.46	0.876
Q96EB6	NAD-dependent protein deacetylase sirtuin-1 OS=Homo sapiens OX=9606 GN=SIRT1 PE=1 SV=2	TQKELAYLSELPPTPLHVSEDSSSPER		0	47.78	86	2.42133e+06	2.75638e+06	1.81902e+06	1.94239e+06	2.17181e+06	1.45964e+06	3.03602e+06	2.33361e+06	2.62553e+06	3.90874e+06	1.40041e+06	3.32712e+06	684647	523233	268583	434023	20.4	19.6	13.2	45.6	36.4	1.14	0.391	1.55	0.378	-1.26	0.255	1.08	0.985
Q96EB6	NAD-dependent protein deacetylase sirtuin-1 OS=Homo sapiens OX=9606 GN=SIRT1 PE=1 SV=2	DLLPETIPPPELDDMTLWQIVINILSEPPKR		0	68.29	73	353813	80968.8	115691	57422.8	421817	16430.2	474886	63611.5	20702.9	671748	280351	65448.4	126056	101087	71216.1	25504.1	80.9	135	135	90.6	53.4	1.02	0.624	2.05	0.386	-1.11	0.55	1.82	0.437
Q96EB6	NAD-dependent protein deacetylase sirtuin-1 OS=Homo sapiens OX=9606 GN=SIRT1 PE=1 SV=2	VDCEAVRGDIFNQVVPR	1xCarbamidomethyl [C3]	0	43.19	71	1.23075e+06	3.09338e+06	2.07442e+06	552412	3.02934e+06	965346	1.44228e+06	3.09563e+06	1.86709e+06	1.47391e+06	1.5817e+06	4.06164e+06	645064	678893	524724	255918	43.7	87.6	40.2	61.7	36.5	1	0.961	1.57	0.388	-1.41	0.419	1.11	0.92
Q96EB6	NAD-dependent protein deacetylase sirtuin-1 OS=Homo sapiens OX=9606 GN=SIRT1 PE=1 SV=2	NVESIAEQMENPDLKNVGSSTGEKNER	1xDeamidated [N/Q]	0	40.06	73	331224	449840	395456	780279	289035	875434	497091	332911	593218	667867	34164.7	412298	1.76424e+06	1.19329e+06	1.62926e+06	577441	15.1	48.5	27.7	85.8	41.4	1.21	0.442	-1.75	0.39	1.65	0.371	-1.28	0.487
Q96EB6	NAD-dependent protein deacetylase sirtuin-1 OS=Homo sapiens OX=9606 GN=SIRT1 PE=1 SV=2	EIYPGQFQPSLCHK	1xCarbamidomethyl [C12]; 1xDeamidated [Q]	0	37.08	42	3.3773e+06	2.40928e+06	2.27361e+06	2.23874e+06	3.957e+06	2.63127e+06	1.84044e+06	4.84944e+06	4.17371e+06	2.37944e+06	4.70242e+06	4.80666e+06	1.58268e+06	2.00584e+06	2.1429e+06	1.58355e+06	22.4	30.6	43.6	34.6	15.8	1.35	0.531	1.35	0.39	1.1	0.734	1.09	0.764
Q96EB6	NAD-dependent protein deacetylase sirtuin-1 OS=Homo sapiens OX=9606 GN=SIRT1 PE=1 SV=2	NYTQNIDTLEQVAGIQR		0	47.97	114	1.63344e+08	2.1839e+08	2.13732e+08	1.50231e+08	1.8189e+08	1.70952e+08	1.51458e+08	1.87823e+08	2.03108e+08	1.56873e+08	2.03074e+08	1.95102e+08	1.05138e+08	1.04293e+08	8.70926e+07	4.53564e+07	15.4	9.59	14.7	13.3	32.8	-1.1	0.511	1.1	0.392	-1.18	0.224	1.02	0.848
Q96EB6	NAD-dependent protein deacetylase sirtuin-1 OS=Homo sapiens OX=9606 GN=SIRT1 PE=1 SV=2	SNDDLDVSESKGCMEEKPQEVQTSR	1xCarbamidomethyl [C13]; 1xDeamidated [N/Q]	0	25.41	68	212287	254267	258308	210333	37364.6	533952	256737	538873	308537	274055	330744	515366	157468	431287	642708	375881	10.5	96.7	40.8	33.8	49.6	1.52	0.232	1.43	0.412	1.08	0.659	1.01	0.923
Q96EB6	NAD-dependent protein deacetylase sirtuin-1 OS=Homo sapiens OX=9606 GN=SIRT1 PE=1 SV=2	AGGAGFGTDGDDQEAINEAISVKQEVTDMNYPSNK	1xDeamidated [N/Q]; 1xOxidation [M29]	0	47.9	117	93827.2	448984	157767	253001	233737	1.26303e+06	851523	184520	447557	299083	181711	267425	938527	112998	78607.1	567873	81.1	101	67.9	24.3	96.3	2.12	0.286	-2.34	0.428	2.5	0.325	-1.98	0.359
Q96EB6	NAD-dependent protein deacetylase sirtuin-1 OS=Homo sapiens OX=9606 GN=SIRT1 PE=1 SV=2	KDPRPFFK		0	31.02	25	4.89857e+06	4.57509e+06	5.26222e+06	4.11881e+06	5.08995e+06	4.11877e+06	8.33562e+06	4.81336e+06	4.55373e+06	4.46388e+06	4.63798e+06	5.24136e+06	4.60742e+06	4.06134e+06	5.0162e+06	6.31421e+06	7	12.6	35.8	8.53	19.2	1.2	0.531	1.08	0.43	-1.11	0.286	-1.23	0.466
Q96EB6	NAD-dependent protein deacetylase sirtuin-1 OS=Homo sapiens OX=9606 GN=SIRT1 PE=1 SV=2	LSEITEKPPRTQK		0	18.24	19	66648.6	145404	226738	806838	127525	100176	1.1494e+06	118702	82970.9	47358.3	129347	205454	150139	76947.5	152008	70958.1	54.7	116	134	62.1	39.6	3.08	0.589	-2.71	0.432	2.36	0.54	-3.54	0.488
Q96EB6	NAD-dependent protein deacetylase sirtuin-1 OS=Homo sapiens OX=9606 GN=SIRT1 PE=1 SV=2	LLRNYTQNIDTLEQVAGIQR	1xDeamidated [N/Q]	0	53.22	72	1.25819e+06	351565	426498	840267	1.06868e+06	746606	983746	711100	668732	821565	478891	921017	163714	73162.3	13663.6	149296	74.1	18.7	21.7	31.3	69.9	1.16	0.531	-1.2	0.434	1.3	0.4	-1.06	0.739
Q96EB6	NAD-dependent protein deacetylase sirtuin-1 OS=Homo sapiens OX=9606 GN=SIRT1 PE=1 SV=2	CPADEPLAIMKPEIVFFGENLPEQFHR	1xCarbamidomethyl [C1]; 1xDeamidated [N/Q]	0	66.31	30	684693	234076	511318	146358	134894	21913.6	366310	226096	164191	848888	48168.2	154305	33872.2	160495	42121.6	235435	47.7	68.1	41.1	124	82.5	-1.89	0.212	3.47	0.442	-4.72	0.0874	1.39	0.792
Q96EB6	NAD-dependent protein deacetylase sirtuin-1 OS=Homo sapiens OX=9606 GN=SIRT1 PE=1 SV=2	NVGSSTGEKNER	1xDeamidated [N]	0	13.14	80	1.46342e+06	1.1181e+06	1.1128e+06	2.34336e+06	1.0541e+06	1.3098e+06	2.28243e+06	942821	910642	1.3028e+06	1.14833e+06	1.09236e+06	2.61609e+06	1.24521e+06	1.28986e+06	1.55603e+06	16.3	43.5	56.8	9.23	38.2	1.12	0.944	-1.33	0.442	1.27	0.515	-1.17	0.86
Q96EB6	NAD-dependent protein deacetylase sirtuin-1 OS=Homo sapiens OX=9606 GN=SIRT1 PE=1 SV=2	GDIFNQVVPR	1xDeamidated [Q/N]	0	36.89	60	2.46648e+07	2.1606e+07	2.40678e+07	2.95734e+07	2.62624e+07	2.44876e+07	2.76084e+07	2.58967e+07	2.70969e+07	2.30196e+07	2.65334e+07	2.60342e+07	2.16482e+07	2.45281e+07	2.54168e+07	2.4162e+07	6.92	9.64	3.27	7.55	6.75	1.15	0.0591	-1.06	0.449	1.14	0.134	-1.07	0.276
Q96EB6	NAD-dependent protein deacetylase sirtuin-1 OS=Homo sapiens OX=9606 GN=SIRT1 PE=1 SV=2	TILKDLLPETIPPPELDDMTLWQIVINILSEPPK	1xDeamidated [Q23]; 1xOxidation [M19]	0	68.3	42	63337.4	26389.3	13967.1	24172.4	9740.73	9011.25	91829.1	4487.38	6380.81	140092	15379.2	9314.14	8464.2	16138.4	8824.97	6049.09	74.3	59.8	146	134	44.2	-1.01	0.541	3.84	0.472	-2.42	0.22	1.6	0.621
Q96EB6	NAD-dependent protein deacetylase sirtuin-1 OS=Homo sapiens OX=9606 GN=SIRT1 PE=1 SV=2	KDINTIEDAVK		0	26.32	97	3.09687e+07	2.88468e+07	3.69969e+07	2.79006e+07	3.99854e+07	2.86869e+07	2.23027e+07	3.19176e+07	3.17543e+07	2.95305e+07	4.00878e+07	3.83638e+07	2.6654e+07	2.93894e+07	3.08801e+07	3.59616e+07	13.1	21	19.2	15.7	12.7	-1.13	0.425	1.12	0.481	-1	0.942	1.26	0.205
Q96EB6	NAD-dependent protein deacetylase sirtuin-1 OS=Homo sapiens OX=9606 GN=SIRT1 PE=1 SV=2	AGGAGFGTDGDDQEAINEAISVKQEVTDMNYPSNK	1xOxidation [M29]	0	46.79	134	4.83934e+06	4.36944e+06	3.16855e+06	5.41534e+06	5.15392e+06	1.52075e+06	6.14675e+06	5.43979e+06	4.16588e+06	5.6782e+06	4.0427e+06	5.43649e+06	703378	922428	516211	479676	20.9	54	19.1	17.5	31	1.27	0.229	1.25	0.481	-1.02	0.755	-1.04	0.827
Q96EB6	NAD-dependent protein deacetylase sirtuin-1 OS=Homo sapiens OX=9606 GN=SIRT1 PE=1 SV=2	ASHASSSDWTPRPR		0	20.82	33	1.47241e+06	459849	1.06399e+06	1.75702e+06	1.0814e+06	535379	851748	1.36095e+06	1.04716e+06	1.53607e+06	1.27142e+06	1.25144e+06	666069	737088	645243	318709	51	54.4	23.6	11.7	31.5	1.09	0.677	1.2	0.488	1.13	0.826	1.25	0.223
Q96EB6	NAD-dependent protein deacetylase sirtuin-1 OS=Homo sapiens OX=9606 GN=SIRT1 PE=1 SV=2	SNDDLDVSESKGCMEEKPQEVQTSR	1xCarbamidomethyl [C13]	0	24.43	97	6.01423e+06	1.30341e+07	1.10652e+07	3.21826e+06	9.85491e+06	6.02699e+06	3.79681e+06	5.36117e+06	6.2074e+06	7.56652e+06	6.15637e+06	9.46647e+06	6.61124e+06	7.32659e+06	7.12023e+06	4.44972e+06	36.1	52.3	23.9	21.5	20.7	-1.96	0.0942	1.21	0.489	-1.58	0.282	1.51	0.0969
Q96EB6	NAD-dependent protein deacetylase sirtuin-1 OS=Homo sapiens OX=9606 GN=SIRT1 PE=1 SV=2	VDCEAVR	1xCarbamidomethyl [C3]	0	14.47	41	3.79984e+07	3.96133e+07	3.9458e+07	4.25991e+07	4.34249e+07	4.57244e+07	3.58136e+07	4.10578e+07	4.45249e+07	3.58674e+07	4.7273e+07	4.0743e+07	5.51668e+07	5.47797e+07	6.14056e+07	6.26501e+07	2.28	3.69	10.8	13.9	7.02	1.04	0.663	-1.06	0.49	1.13	0.0138	1.02	0.87
Q96EB6	NAD-dependent protein deacetylase sirtuin-1 OS=Homo sapiens OX=9606 GN=SIRT1 PE=1 SV=2	NVESIAEQMENPDLKNVGSSTGEK	1xDeamidated [N/Q]; 1xOxidation [M9]	0	30.69	94	156888	485972	337765	220591	260051	341526	370939	293181	304435	300371	248613	402027	312852	349571	344809	360328	50.4	22.5	13	24.6	5.97	-1.01	0.827	1.16	0.494	-1.19	0.817	-1.02	0.849
Q96EB6	NAD-dependent protein deacetylase sirtuin-1 OS=Homo sapiens OX=9606 GN=SIRT1 PE=1 SV=2	LAVDFPDLPDPQAMFDIEYFR	1xOxidation [M14]	0	67.16	101	2.86324e+07	1.49554e+06	1.31659e+07	1.25452e+07	6.08744e+07	2.68593e+07	1.43643e+07	1.51671e+07	1.6004e+06	2.16518e+07	2.41061e+07	1.21782e+07	4.0558e+06	1.41971e+06	807961	5.99815e+06	94.3	74.3	73.3	32.6	78.4	-1.39	0.896	-1.73	0.497	2.32	0.315	1.86	0.321
Q96EB6	NAD-dependent protein deacetylase sirtuin-1 OS=Homo sapiens OX=9606 GN=SIRT1 PE=1 SV=2	NVESIAEQMENPDLKNVGSSTGEK	1xDeamidated [Q/N]	0	40.87	81	215870	335575	175173	272589	352545	110247	425234	350262	341813	230696	259751	415410	227743	241419	235801	70326.6	34.4	50.4	12.3	32.9	42.6	1.54	0.125	1.23	0.524	1.01	0.89	-1.23	0.316
Q96EB6	NAD-dependent protein deacetylase sirtuin-1 OS=Homo sapiens OX=9606 GN=SIRT1 PE=1 SV=2	NVGSSTGEKNER	2xDeamidated [N1; N10]	0	12.53	64	240513	66888.7	882351	110780	268553	167975	402013	421368	137974	39961.8	220821	164394	4.96423e+06	721986	370134	371711	108	43.8	49.4	65.3	140	-1.24	0.854	-1.29	0.534	-2.17	0.694	-2.26	0.23
Q96EB6	NAD-dependent protein deacetylase sirtuin-1 OS=Homo sapiens OX=9606 GN=SIRT1 PE=1 SV=2	AGGAGFGTDGDDQEAINEAISVKQEVTDMNYPSNKS	2xDeamidated [N17; N/Q]; 1xOxidation [M29]	0	38.31	64	45242.4	120467	76921.6	115336	11222.6	19127.4	219489	20590.3	20094.6	174655	61113	15483.1	16311.4	8342.23	9916.51	5823.53	46.7	119	133	97.9	44.3	1.07	0.595	1.72	0.559	-1.67	0.314	-1.04	0.86
Q96EB6	NAD-dependent protein deacetylase sirtuin-1 OS=Homo sapiens OX=9606 GN=SIRT1 PE=1 SV=2	GCMEEKPQEVQTSR	1xCarbamidomethyl [C2]; 1xDeamidated [Q]; 1xOxidation [M3]	0	14.63	60	1.2411e+06	75566.3	906181	1.07822e+06	1.58336e+06	787926	753496	2.15494e+06	1.32245e+06	747669	2.08442e+06	1.76908e+06	576557	1.38375e+06	813938	21994.5	81	35	50	45.6	80.7	1.9	0.349	1.33	0.566	1.55	0.409	1.09	0.859
Q96EB6	NAD-dependent protein deacetylase sirtuin-1 OS=Homo sapiens OX=9606 GN=SIRT1 PE=1 SV=2	GCMEEKPQEVQTSR	1xCarbamidomethyl [C2]	0	16.45	95	4.1264e+07	4.3595e+07	6.27554e+07	4.0372e+07	7.64624e+07	7.63452e+07	2.88657e+07	6.49414e+07	5.78414e+07	3.8431e+07	6.90921e+07	5.32379e+07	5.67135e+07	6.98284e+07	7.47091e+07	6.13588e+07	24	32.3	37.8	28.6	12.4	1.03	0.965	-1.2	0.567	1.31	0.392	1.06	0.788
Q96EB6	NAD-dependent protein deacetylase sirtuin-1 OS=Homo sapiens OX=9606 GN=SIRT1 PE=1 SV=2	DNLLFGDEIITNGFHSCESDEEDR	1xCarbamidomethyl [C17]	0	53.83	50	39531.7	14150.4	12841.7	65399	49689.2	9167.98	531442	84631.8	64740	45726.6	62160.7	36249.5	7863.01	7725.22	5901.44	8760.43	67.9	70	116	27.3	15.9	10.2	0.0742	1.16	0.574	1.87	0.55	-4.72	0.231
Q96EB6	NAD-dependent protein deacetylase sirtuin-1 OS=Homo sapiens OX=9606 GN=SIRT1 PE=1 SV=2	LCCNPVKLSEITEKPPR	2xCarbamidomethyl [C2; C3]	0	35.97	37	54004.5	73603.7	69411.5	386127	241751	47769.3	4.16729e+06	185808	103864	633959	178656	163756	8775.38	9734.8	13595.9	9045.24	15.7	75.4	156	82.1	21.8	22.6	0.24	1.45	0.574	3.43	0.279	-4.56	0.721
Q96EB6	NAD-dependent protein deacetylase sirtuin-1 OS=Homo sapiens OX=9606 GN=SIRT1 PE=1 SV=2	GCMEEKPQEVQTSRNVESIAEQMENPDLK	1xCarbamidomethyl [C2]; 1xDeamidated [Q/N]; 2xOxidation [M3; M23]	0	30.89	27	15558.2	25235.9	12377.2	5.26248e+06	42000.3	30718	228170	38094	21012.2	272647	33039.1	23064.1	5168.84	5881.6	7839.46	6911.53	37.8	170	120	129	18.1	5.4	0.229	-16.2	0.574	100	0.283	1.14	0.969
Q96EB6	NAD-dependent protein deacetylase sirtuin-1 OS=Homo sapiens OX=9606 GN=SIRT1 PE=1 SV=2	NVESIAEQMENPDLKNVGSSTGEK		0	42.94	77	2.89581e+06	6.99249e+06	7.5654e+06	1.55977e+06	5.75016e+06	8.08742e+07	2.26582e+06	5.86913e+06	4.04134e+06	3.05835e+06	3.44744e+06	6.82463e+06	3.46908e+06	6.98914e+07	3.08841e+06	2.15809e+06	43.8	152	44.4	46.6	170	-1.43	0.447	-6.62	0.578	5.05	0.704	1.09	0.807
Q96EB6	NAD-dependent protein deacetylase sirtuin-1 OS=Homo sapiens OX=9606 GN=SIRT1 PE=1 SV=2	AGGAGFGTDGDDQEAINEAISVKQEVTDMNYPSNKS	1xOxidation [M29]	0	46.66	119	1.25273e+07	1.65526e+07	1.02528e+07	1.66685e+07	1.21523e+07	5.93784e+06	1.74371e+07	1.44208e+07	1.11472e+07	1.52294e+07	8.96224e+06	1.69372e+07	2.66033e+06	2.74138e+06	1.6409e+06	1.33044e+06	24.3	46.5	21.9	30.6	34.1	1.09	0.653	1.18	0.586	-1.13	0.614	-1.05	0.801
Q96EB6	NAD-dependent protein deacetylase sirtuin-1 OS=Homo sapiens OX=9606 GN=SIRT1 PE=1 SV=2	NVGSSTGEK		0	12.52	49	672011	771412	1.10804e+06	1.06465e+06	691744	803742	1.04276e+06	437585	1.09947e+06	843643	1.06309e+06	857367	2.44969e+06	1.46781e+06	1.27072e+06	1.56929e+06	26.9	22.4	42.7	13.3	30.9	1.01	0.901	1.08	0.591	1	0.962	1.07	0.685
Q96EB6	NAD-dependent protein deacetylase sirtuin-1 OS=Homo sapiens OX=9606 GN=SIRT1 PE=1 SV=2	LDGNQYLFLPPNR		0	45.85	92	7.2334e+06	7.30868e+06	9.72622e+06	7.43739e+06	8.94724e+06	8.70416e+06	5.97566e+06	7.78462e+06	8.6836e+06	5.94446e+06	8.88626e+06	8.55883e+06	7.19173e+06	7.38172e+06	7.80585e+06	6.78547e+06	17.5	9.69	18.4	20.7	5.81	-1.08	0.615	-1.07	0.601	1.03	0.747	1.04	0.836
Q96EB6	NAD-dependent protein deacetylase sirtuin-1 OS=Homo sapiens OX=9606 GN=SIRT1 PE=1 SV=2	LDGNQYLFLPPNR	1xDeamidated [Q/N]	0	47.08	98	313963	344515	457145	355632	420771	519822	238845	393005	469289	252421	493442	420547	321351	360098	393044	381617	20.3	19.1	32	31.8	8.67	-1.01	0.878	-1.11	0.606	1.16	0.392	1.06	0.85
Q96EB6	NAD-dependent protein deacetylase sirtuin-1 OS=Homo sapiens OX=9606 GN=SIRT1 PE=1 SV=2	QEVTDMNYPSNK	1xDeamidated [N7]	0	23.38	47	306129	112155	165017	1.08105e+07	202773	297023	2.63086e+06	250490	285543	1.38366e+06	253377	161345	221335	330270	380448	358853	51.6	162	129	114	21.9	5.43	0.262	-6.29	0.608	19.4	0.338	-1.76	0.711
Q96EB6	NAD-dependent protein deacetylase sirtuin-1 OS=Homo sapiens OX=9606 GN=SIRT1 PE=1 SV=2	NERTSVAGTVR		0	15.25	21	639467	174686	14004.2	1.10423e+06	39545.8	41892.1	517680	46461.4	40711	432167	7306.84	40633	8790.18	7412.94	7800.84	10206.2	118	155	136	148	14.6	-1.37	0.917	-2.47	0.613	1.43	0.975	-1.26	0.666
Q96EB6	NAD-dependent protein deacetylase sirtuin-1 OS=Homo sapiens OX=9606 GN=SIRT1 PE=1 SV=2	QEVTDMNYPSNK	1xDeamidated [N/Q]; 1xOxidation [M6]	0	17.45	54	146103	93974.7	87744.7	159890	107549	155534	125488	137576	164161	114054	153610	117471	133808	158305	194164	213723	29.3	20.6	13.9	17.1	20.4	1.3	0.21	-1.1	0.615	1.29	0.267	-1.11	0.437
Q96EB6	NAD-dependent protein deacetylase sirtuin-1 OS=Homo sapiens OX=9606 GN=SIRT1 PE=1 SV=2	NYTQNIDTLEQVAGIQR	3xDeamidated [N/Q]	0	37.81	99	4.08698e+06	1.70464e+06	1.28355e+06	2.74393e+06	2.26449e+06	965069	3.95142e+06	1.9383e+06	1.63391e+06	4.12174e+06	1.86457e+06	1.58694e+06	1.1724e+06	994013	1.05407e+06	1.06652e+06	64.1	46.2	50.2	55.1	6.92	1.06	0.813	1.27	0.616	-1.18	0.793	1.01	0.984
Q96EB6	NAD-dependent protein deacetylase sirtuin-1 OS=Homo sapiens OX=9606 GN=SIRT1 PE=1 SV=2	ADEAALALQPGGSPSAAGADR		0	31.63	34	20889.3	7462.1	3402.72	123569	2533.98	14103.8	81390.3	6674.94	15269.8	176864	19286.5	12403.4	21449.8	14743	18931	15824.9	86.5	143	119	134	17.2	3.25	0.373	1.49	0.62	4.42	0.611	2.02	0.649
Q96EB6	NAD-dependent protein deacetylase sirtuin-1 OS=Homo sapiens OX=9606 GN=SIRT1 PE=1 SV=2	QEVTDMNYPSNKS		0	22.38	65	1.70941e+07	2.73672e+07	3.00706e+07	1.99557e+07	3.42414e+07	3.66118e+07	2.03021e+07	3.17402e+07	3.57399e+07	2.12963e+07	2.91844e+07	2.82503e+07	4.06159e+07	4.09365e+07	4.19195e+07	4.10723e+07	27.6	29.8	27.4	16.4	1.35	1.18	0.54	-1.15	0.624	1.22	0.501	-1.11	0.679
Q96EB6	NAD-dependent protein deacetylase sirtuin-1 OS=Homo sapiens OX=9606 GN=SIRT1 PE=1 SV=2	AGGAGFGTDGDDQEAINEAISVKQEVTDMNYPSNKS	1xDeamidated [N/Q]	0	52.37	111	355313	445774	894143	972174	282058	412211	1.2589e+06	498612	462578	479097	355134	350985	408664	130554	379270	109652	51.1	66	60.8	18.4	61.8	1.31	0.604	-1.41	0.625	-1.02	0.879	-1.87	0.238
Q96EB6	NAD-dependent protein deacetylase sirtuin-1 OS=Homo sapiens OX=9606 GN=SIRT1 PE=1 SV=2	RDGPGLER		0	14.75	48	6.26078e+07	5.64919e+07	9.2936e+07	5.39379e+07	1.08903e+08	8.97916e+07	4.90759e+07	1.01682e+08	9.22145e+07	5.92911e+07	1.1927e+08	1.2262e+08	6.41585e+07	8.56241e+07	1.04297e+08	5.79718e+07	27.6	33.1	34.6	35.5	27.1	1.15	0.706	1.19	0.629	1.19	0.578	1.24	0.557
Q96EB6	NAD-dependent protein deacetylase sirtuin-1 OS=Homo sapiens OX=9606 GN=SIRT1 PE=1 SV=2	LGGEYAKLCCNPVK	2xCarbamidomethyl [C9; C10]	0	30.52	61	243871	754873	349044	140792	518248	364716	177582	770283	343579	233295	734457	347195	302318	355674	361877	247104	60.1	55.6	71	59.9	16.9	-1.04	0.857	1.28	0.63	-1.32	0.598	1.02	0.892
Q96EB6	NAD-dependent protein deacetylase sirtuin-1 OS=Homo sapiens OX=9606 GN=SIRT1 PE=1 SV=2	QEVTDMNYPSNK	1xOxidation [M6]	0	16.56	69	1.17261e+07	8.29196e+06	8.54118e+06	1.80013e+07	1.06335e+07	1.05506e+07	1.67844e+07	1.05109e+07	1.36767e+07	1.28889e+07	1.17488e+07	9.77753e+06	1.39067e+07	1.44036e+07	1.55705e+07	1.42991e+07	20.1	32.8	23	13.7	4.93	1.43	0.115	-1.14	0.634	1.37	0.241	-1.19	0.373
Q96EB6	NAD-dependent protein deacetylase sirtuin-1 OS=Homo sapiens OX=9606 GN=SIRT1 PE=1 SV=2	DINTIEDAVK		0	33.93	52	2.80488e+08	2.71725e+08	2.96964e+08	2.4235e+08	2.32949e+08	3.00307e+08	2.28036e+08	2.36393e+08	2.96205e+08	2.47311e+08	2.81209e+08	2.80555e+08	3.3289e+08	3.52277e+08	3.46684e+08	3.62754e+08	4.53	14.1	14.7	7.19	3.57	-1.12	0.289	1.04	0.637	-1.09	0.348	1.06	0.521
Q96EB6	NAD-dependent protein deacetylase sirtuin-1 OS=Homo sapiens OX=9606 GN=SIRT1 PE=1 SV=2	QEVTDMNYPSNKS	2xDeamidated [Q1; N11]	0	23.92	13	54549.5	8444.51	2759.2	69340.8	5696.72	18962.2	36933.1	4202.77	18487.3	27268	7920.3	9833	29994.6	19620.5	23190	23338.2	130	107	82.6	71	18	-1.1	0.815	-2.09	0.642	1.43	0.63	-1.32	0.901
Q96EB6	NAD-dependent protein deacetylase sirtuin-1 OS=Homo sapiens OX=9606 GN=SIRT1 PE=1 SV=2	TSPPDSSVIVTLLDQAAKSNDDLDVSESK		0	61.28	71	172586	145356	162166	1.12243e+07	321916	168915	2.31579e+06	196315	164770	1.61759e+06	230303	178444	4914.92	8169.6	5563.52	10296	8.59	162	138	121	34.2	5.58	0.373	-5.78	0.651	24.4	0.329	-1.32	0.973
Q96EB6	NAD-dependent protein deacetylase sirtuin-1 OS=Homo sapiens OX=9606 GN=SIRT1 PE=1 SV=2	NVESIAEQMENPDLKNVGSSTGEKNER		0	38.57	120	2.34061e+06	8.9653e+06	8.0241e+06	1.8418e+06	9.85386e+06	3.79308e+06	3.15697e+06	8.13912e+06	4.89431e+06	4.07813e+06	3.95901e+06	9.81457e+06	3.06573e+06	3.54698e+06	2.52121e+06	2.73233e+06	55.6	80.9	46.9	56.2	15.1	-1.19	0.86	1.15	0.656	-1.25	0.67	1.1	0.858
Q96EB6	NAD-dependent protein deacetylase sirtuin-1 OS=Homo sapiens OX=9606 GN=SIRT1 PE=1 SV=2	QEVTDMNYPSNKS	1xDeamidated [N]; 1xOxidation [M6]	0	17.16	79	2.06795e+06	2.25927e+06	2.03907e+06	2.80604e+06	2.10343e+06	2.24881e+06	2.50977e+06	2.07026e+06	2.784e+06	2.34393e+06	2.25526e+06	2.20028e+06	2.69798e+06	2.91627e+06	3.02191e+06	3.2939e+06	5.64	15.5	14.7	3.2	8.3	1.16	0.245	-1.05	0.666	1.12	0.333	-1.08	0.492
Q96EB6	NAD-dependent protein deacetylase sirtuin-1 OS=Homo sapiens OX=9606 GN=SIRT1 PE=1 SV=2	YKVDCEAVRGDIFNQVVPR	1xCarbamidomethyl [C5]	0	54.49	31	1.95191e+06	2.21703e+06	1.27141e+06	2.06716e+06	1.32931e+06	345991	3.32406e+06	1.06903e+06	732954	1.60032e+06	899054	1.51402e+06	82903.6	424350	57803.8	65660.1	26.9	69.2	82.5	28.6	113	-1.06	0.648	1.07	0.667	-1.45	0.392	-1.28	0.912
Q96EB6	NAD-dependent protein deacetylase sirtuin-1 OS=Homo sapiens OX=9606 GN=SIRT1 PE=1 SV=2	DLLPETIPPPELDDMTLWQIVINILSEPPK		0	68.61	53	155063	56536.9	87164.8	4.49735e+06	303084	24412.6	179941	28694.2	30029.7	250114	317111	39984.9	125472	71984.4	54277.6	32693.5	50.6	156	109	71.4	55.8	-1.25	0.488	-7.95	0.669	16.1	0.493	2.54	0.322
Q96EB6	NAD-dependent protein deacetylase sirtuin-1 OS=Homo sapiens OX=9606 GN=SIRT1 PE=1 SV=2	DLLPETIPPPELDDMTLWQIVINILSEPPKR	1xDeamidated [Q19]; 1xOxidation [M15]	0	68.52	65	24313.7	12101.9	4478.86	153955	7534.44	30612.6	232554	32914.6	7609.83	31516.4	155399	30529.6	8895.43	4167.79	7373.23	26028.9	73.4	123	135	99.1	84.4	6.68	0.338	1.13	0.669	4.7	0.349	-1.26	0.798
Q96EB6	NAD-dependent protein deacetylase sirtuin-1 OS=Homo sapiens OX=9606 GN=SIRT1 PE=1 SV=2	RLDGNQYLFLPPNR		0	42.9	79	5.06018e+07	4.30671e+07	5.85132e+07	6.23863e+07	8.81734e+07	6.52585e+07	9.45545e+07	7.84803e+07	6.5403e+07	5.8316e+07	6.43295e+07	7.8859e+07	4.79147e+07	2.09357e+07	3.85724e+07	2.94128e+07	15.2	19.6	18.4	15.7	34	1.57	0.0339	-1.07	0.671	1.42	0.0721	-1.18	0.302
Q96EB6	NAD-dependent protein deacetylase sirtuin-1 OS=Homo sapiens OX=9606 GN=SIRT1 PE=1 SV=2	SNDDLDVSESK		0	18.41	89	1.8509e+08	2.05824e+08	2.31031e+08	1.88701e+08	1.86285e+08	2.40835e+08	1.75851e+08	1.95886e+08	2.27498e+08	1.69057e+08	2.18075e+08	1.98124e+08	2.85478e+08	2.75947e+08	2.89898e+08	3.19377e+08	11.1	15	13	12.6	6.4	-1.04	0.714	-1.05	0.683	-1.01	0.908	-1.02	0.835
Q96EB6	NAD-dependent protein deacetylase sirtuin-1 OS=Homo sapiens OX=9606 GN=SIRT1 PE=1 SV=2	EAASSPAGEPLRK		0	16.28	59	1.66519e+07	1.37852e+07	1.74778e+07	1.89366e+07	1.99121e+07	2.07249e+07	1.73745e+07	1.96561e+07	2.06029e+07	1.57445e+07	2.25887e+07	1.9129e+07	2.20443e+07	2.3659e+07	2.67954e+07	2.60032e+07	12.1	4.51	8.64	17.9	8.84	1.2	0.11	-1.04	0.705	1.24	0.0781	-1	0.929
Q96EB6	NAD-dependent protein deacetylase sirtuin-1 OS=Homo sapiens OX=9606 GN=SIRT1 PE=1 SV=2	AGGAGFGTDGDDQEAINEAISVK	1xDeamidated [N/Q]	0	42.91	156	2.03421e+06	1.67587e+06	1.08506e+06	3.06008e+06	2.79144e+06	1.21228e+06	4.94087e+06	3.01485e+06	2.22739e+06	2.07209e+06	2.93428e+06	2.52748e+06	1.16457e+06	695559	600159	681929	30	42.4	41.1	17.2	32.6	2.12	0.0728	1.07	0.707	1.47	0.39	-1.35	0.392
Q96EB6	NAD-dependent protein deacetylase sirtuin-1 OS=Homo sapiens OX=9606 GN=SIRT1 PE=1 SV=2	SNDDLDVSESK	1xDeamidated [N2]	0	19.19	89	8.07051e+06	8.70919e+06	3.70138e+06	8.94167e+06	3.48622e+06	3.92283e+06	6.78469e+06	2.95501e+06	3.76348e+06	6.89754e+06	3.67058e+06	3.02539e+06	4.32167e+06	4.54366e+06	4.74642e+06	5.24132e+06	39.9	55.6	44.8	45.8	8.33	-1.52	0.326	-1.2	0.708	-1.25	0.567	1.01	0.989
Q96EB6	NAD-dependent protein deacetylase sirtuin-1 OS=Homo sapiens OX=9606 GN=SIRT1 PE=1 SV=2	DINTIEDAVKLLQECK	1xCarbamidomethyl [C15]	0	58.58	21	57596.4	34089.9	52408.3	80961.2	84545.3	45121	965202	67360.4	52002.6	35590.7	92096.8	63008.9	9008.78	6119.68	4430.67	8526.68	25.7	31.1	145	44.5	30.5	7.53	0.338	-1.1	0.717	1.46	0.233	-5.69	0.426
Q96EB6	NAD-dependent protein deacetylase sirtuin-1 OS=Homo sapiens OX=9606 GN=SIRT1 PE=1 SV=2	TQKELAYLSELPPTPLHVSEDSSSPER	1xDeamidated [Q2]	0	51.76	61	148020	52094.9	1.0274e+06	81456.8	129099	97489.9	79632.4	2210.7	32526.8	135572	123471	36012.4	25311	38295.8	22072.6	25098.5	131	23.6	102	55.2	26.1	-10.7	0.16	-1.04	0.725	-3.98	0.518	2.58	0.285
Q96EB6	NAD-dependent protein deacetylase sirtuin-1 OS=Homo sapiens OX=9606 GN=SIRT1 PE=1 SV=2	VAKEQISR		0	13.56	55	6.71318e+06	5.63526e+06	1.7281e+06	1.1575e+07	277672	1.4716e+06	9.88505e+06	1.91596e+06	1.259e+06	7.0116e+06	241340	566733	4.06269e+06	3.39218e+06	2.53434e+06	4.30268e+06	55.9	140	110	146	22.2	-1.08	0.684	-1.7	0.737	-1.06	0.513	-1.67	0.428
Q96EB6	NAD-dependent protein deacetylase sirtuin-1 OS=Homo sapiens OX=9606 GN=SIRT1 PE=1 SV=2	TILKDLLPETIPPPELDDMTLWQIVINILSEPPKR	1xDeamidated [Q23]; 1xOxidation [M19]	0	78.59	38	31291.9	38178.9	12517	74662.5	10273.7	3731.74	49970.4	8731.74	11291	98156.8	11210.2	9064.8	4774.56	21080.5	14154.5	6510.4	48.6	133	99	129	64.5	-1.17	0.601	1.34	0.739	1.08	0.606	1.69	0.815
Q96EB6	NAD-dependent protein deacetylase sirtuin-1 OS=Homo sapiens OX=9606 GN=SIRT1 PE=1 SV=2	FIALSDK		0	28.92	41	3.9874e+07	3.0688e+07	3.78358e+07	4.69702e+07	2.90135e+07	3.50057e+07	3.74834e+07	2.78996e+07	3.8387e+07	3.54121e+07	3.6649e+07	3.15597e+07	4.59675e+07	4.4775e+07	4.47657e+07	4.9306e+07	13.4	24.7	16.8	7.68	4.64	-1.04	0.734	-1.07	0.758	1.02	0.954	-1	0.956
Q96EB6	NAD-dependent protein deacetylase sirtuin-1 OS=Homo sapiens OX=9606 GN=SIRT1 PE=1 SV=2	NVESIAEQMENPDLKNVGSSTGEKNER	1xDeamidated [N/Q]; 1xOxidation [M9]	0	28.61	120	3.55897e+06	790207	962531	199375	5.00722e+06	90303.9	195144	241566	498512	357857	181187	7.2016e+06	816618	220737	89127.6	353213	87.6	159	52.4	155	85.6	-5.68	0.0575	1.46	0.759	-1	0.461	8.28	0.474
Q96EB6	NAD-dependent protein deacetylase sirtuin-1 OS=Homo sapiens OX=9606 GN=SIRT1 PE=1 SV=2	NYTQNIDTLEQVAGIQR	2xDeamidated [Q/N]	0	45.92	105	266205	422577	428465	81877.6	518125	440300	143878	430425	497195	113976	563221	629002	237281	220919	230782	185388	24.7	67.1	52.6	64.4	10.6	-1.04	0.75	1.26	0.766	-1.07	0.65	1.22	0.901
Q96EB6	NAD-dependent protein deacetylase sirtuin-1 OS=Homo sapiens OX=9606 GN=SIRT1 PE=1 SV=2	IIQCHGSFATASCLICK	3xCarbamidomethyl [C4; C13; C16]	0	37.81	101	2.6295e+07	1.49069e+07	9.67477e+06	2.9017e+07	1.85213e+07	7.31912e+06	2.64745e+07	1.85113e+07	1.35077e+07	3.16827e+07	1.31144e+07	1.49075e+07	6.0511e+06	6.83486e+06	8.79804e+06	9.88669e+06	50.1	59.3	33.5	51.5	22.3	1.15	0.626	1.09	0.775	1.08	0.982	1.02	0.951
Q96EB6	NAD-dependent protein deacetylase sirtuin-1 OS=Homo sapiens OX=9606 GN=SIRT1 PE=1 SV=2	TSPPDSSVIVTLLDQAAKSNDDLDVSESK	1xDeamidated [N/Q]	0	60.24	97	1.33798e+06	1.27945e+06	1.71611e+06	912759	1.44281e+06	1.37628e+06	1.3102e+06	1.69394e+06	1.4585e+06	940693	1.16019e+06	2.16503e+06	254531	87852.9	18143.5	47583	16.4	23.2	13	45.9	104	1.03	0.798	1.14	0.779	-1.16	0.411	-1.05	0.722
Q96EB6	NAD-dependent protein deacetylase sirtuin-1 OS=Homo sapiens OX=9606 GN=SIRT1 PE=1 SV=2	AGGAGFGTDGDDQEAINEAISVKQEVTDMNYPSNK	2xDeamidated [N17; Q/N]	0	42.65	64	26003.4	18972.9	12287.7	24472.9	2994.17	9031.24	57652.5	7976.15	4244.2	36413.8	2656.86	2963.4	8820.56	7647.54	9248.01	5048.26	35.9	91	128	138	24.5	1.22	0.683	1.15	0.805	-1.57	0.35	-1.66	0.611
Q96EB6	NAD-dependent protein deacetylase sirtuin-1 OS=Homo sapiens OX=9606 GN=SIRT1 PE=1 SV=2	LAVDFPDLPDPQAMFDIEYFR		0	67.73	97	1.7207e+07	2.16603e+06	2.22221e+07	1.63382e+07	8.13843e+07	2.2477e+07	1.876e+07	1.5827e+07	2.41093e+06	3.75167e+07	3.40601e+07	1.48956e+07	4.06929e+06	2.09983e+06	897194	3.96014e+06	75.3	89.6	70.7	42.3	55.7	-1.12	0.963	-1.39	0.808	2.89	0.258	2.34	0.233
Q96EB6	NAD-dependent protein deacetylase sirtuin-1 OS=Homo sapiens OX=9606 GN=SIRT1 PE=1 SV=2	GCMEEKPQEVQTSR	1xCarbamidomethyl [C2]; 1xDeamidated [Q]	0	17.25	84	1.29186e+06	1.36124e+06	1.52083e+06	487488	1.92712e+06	2.39813e+06	335402	1.99897e+06	1.55978e+06	529170	1.82948e+06	1.42412e+06	828041	1.91345e+06	2.11135e+06	2.41482e+06	8.44	62	66.4	52.8	38	-1.07	0.632	-1.27	0.808	1.15	0.919	-1.03	0.899
Q96EB6	NAD-dependent protein deacetylase sirtuin-1 OS=Homo sapiens OX=9606 GN=SIRT1 PE=1 SV=2	AMKYDKDEVDLLIVIGSSLK	1xOxidation [M2]	0	67.38	40	780536	867619	167094	2.54467e+06	103730	44906.1	625754	391715	191790	1.1298e+06	140368	222759	232226	290389	393143	152747	63.1	159	53.9	110	37.9	-1.5	0.672	-1.8	0.81	1.48	0.618	1.23	0.903
Q96EB6	NAD-dependent protein deacetylase sirtuin-1 OS=Homo sapiens OX=9606 GN=SIRT1 PE=1 SV=2	TSPPDSSVIVTLLDQAAK	1xDeamidated [Q15]	0	63.75	97	3.40963e+06	2.59477e+06	2.40287e+06	2.26887e+06	2.59515e+06	3.09111e+06	2.21004e+06	3.85767e+06	2.73891e+06	1.96438e+06	3.60835e+06	3.00898e+06	807905	853221	700804	331540	19.1	15.6	28.7	29.1	35.1	1.05	0.881	1.08	0.81	-1.06	0.729	-1.03	0.907
Q96EB6	NAD-dependent protein deacetylase sirtuin-1 OS=Homo sapiens OX=9606 GN=SIRT1 PE=1 SV=2	TILKDLLPETIPPPELDDMTLWQIVINILSEPPKR	1xOxidation [M19]	0	68.19	34	10884.8	61126.7	9960.78	72071.9	7089.91	11485.3	57584.5	3935.1	9990.38	193190	2173.42	4153.2	23334.5	61129.8	14121.7	73407.7	107	120	123	165	66.8	-1.15	0.736	2.2	0.813	1.11	0.967	2.79	0.96
Q96EB6	NAD-dependent protein deacetylase sirtuin-1 OS=Homo sapiens OX=9606 GN=SIRT1 PE=1 SV=2	NVESIAEQMENPDLK		0	41.63	107	5.57023e+07	9.25148e+07	1.37555e+08	5.79842e+07	1.3171e+08	1.3036e+08	5.0599e+07	1.22863e+08	1.34515e+08	5.55358e+07	1.19703e+08	1.1533e+08	9.89549e+07	1.06348e+08	1.09472e+08	8.94032e+07	43	39.5	44.3	37	8.83	1.08	0.899	-1.1	0.825	1.12	0.779	-1.06	0.946
Q96EB6	NAD-dependent protein deacetylase sirtuin-1 OS=Homo sapiens OX=9606 GN=SIRT1 PE=1 SV=2	GCMEEKPQEVQTSRNVESIAEQMENPDLK	1xCarbamidomethyl [C2]; 2xOxidation [M3; M23]	0	31.76	26	87752.6	32012.4	8794.55	112283	40469.4	18038.4	149221	12369.4	43612.3	98786.2	31912.1	40043.9	11742.5	10798	13247	13497.3	94.7	86.5	105	64.1	10.4	1.6	0.708	-1	0.833	1.33	0.664	-1.2	0.863
Q96EB6	NAD-dependent protein deacetylase sirtuin-1 OS=Homo sapiens OX=9606 GN=SIRT1 PE=1 SV=2	VDCEAVRGDIFNQVVPR	1xCarbamidomethyl [C3]; 1xDeamidated [N/Q]	0	39.36	55	2.80126e+06	148167	236244	7.83819e+06	233173	112566	630941	87405.2	162708	1.77802e+06	185434	224202	72372.7	84679.3	59780.2	31259.3	142	162	100	125	36.9	-3.62	0.509	-3.74	0.834	2.57	0.885	2.48	0.494
Q96EB6	NAD-dependent protein deacetylase sirtuin-1 OS=Homo sapiens OX=9606 GN=SIRT1 PE=1 SV=2	GDIFNQVVPR		0	40.44	72	3.06819e+08	3.2581e+08	2.97964e+08	2.80752e+08	2.42486e+08	2.47735e+08	2.67192e+08	2.65097e+08	2.91905e+08	2.84035e+08	2.50518e+08	2.4699e+08	3.00183e+08	3.2752e+08	3.31675e+08	3.01484e+08	4.59	8.07	5.43	7.85	5.3	-1.13	0.0412	1.01	0.84	-1.21	0.0333	-1.05	0.38
Q96EB6	NAD-dependent protein deacetylase sirtuin-1 OS=Homo sapiens OX=9606 GN=SIRT1 PE=1 SV=2	NVESIAEQMENPDLK	1xDeamidated [Q/N]	0	43.82	98	1.30883e+06	2.06224e+06	3.02416e+06	972415	3.14348e+06	3.56772e+06	473145	3.36258e+06	3.23029e+06	758548	3.38539e+06	2.89379e+06	2.13302e+06	2.25915e+06	2.63051e+06	2.38179e+06	40.3	54.4	69.3	59.5	9.02	1.1	0.84	-1.09	0.849	1.2	0.852	-1	0.886
Q96EB6	NAD-dependent protein deacetylase sirtuin-1 OS=Homo sapiens OX=9606 GN=SIRT1 PE=1 SV=2	ADEAALALQPGGSPSAAGADREAASSPAGEPLR		0	36.04	37	38385	11305.6	15444.6	171732	26335	18116.9	478707	34495.8	24904.6	264394	24102.7	23747.2	5144.42	7910.71	9450.46	5579.22	67.2	120	145	133	28.8	8.26	0.278	1.44	0.857	3.32	0.366	-1.72	0.8
Q96EB6	NAD-dependent protein deacetylase sirtuin-1 OS=Homo sapiens OX=9606 GN=SIRT1 PE=1 SV=2	QEVTDMNYPSNKS	1xOxidation [M6]	0	16.52	75	3.20431e+07	3.34262e+07	2.79536e+07	4.05108e+07	2.88293e+07	2.76973e+07	4.19079e+07	2.95459e+07	3.67521e+07	3.7708e+07	2.85662e+07	3.24948e+07	3.88088e+07	4.11516e+07	4.2812e+07	4.03424e+07	9.14	21.9	17.2	13.9	4.09	1.16	0.312	1.02	0.866	1.04	0.859	-1.1	0.539
Q96EB6	NAD-dependent protein deacetylase sirtuin-1 OS=Homo sapiens OX=9606 GN=SIRT1 PE=1 SV=2	IIVLTGAGVSVSCGIPDFR	1xCarbamidomethyl [C13]	0	67.22	129	2.95518e+07	9.79354e+06	4.60148e+06	5.14291e+07	1.00424e+07	6.46129e+06	2.48796e+07	1.30843e+07	4.17096e+06	3.47709e+07	9.14856e+06	6.88701e+06	1.62328e+06	5.46953e+06	4.29032e+06	7.47135e+06	89.9	110	74	91.4	51.8	-1.04	0.994	-1.34	0.87	1.55	0.731	1.21	0.836
Q96EB6	NAD-dependent protein deacetylase sirtuin-1 OS=Homo sapiens OX=9606 GN=SIRT1 PE=1 SV=2	LAVDFPDLPDPQAMFDIEYFRK		0	67.45	63	1.74412e+06	284855	1.09637e+06	2.50612e+06	5.21092e+06	948174	2.42512e+06	948187	208964	5.71184e+06	1.37494e+06	1.08903e+06	230307	398045	142405	544043	70.2	74.7	94.5	95.1	54.3	1.15	0.965	-1.06	0.872	2.77	0.23	2.28	0.343
Q96EB6	NAD-dependent protein deacetylase sirtuin-1 OS=Homo sapiens OX=9606 GN=SIRT1 PE=1 SV=2	NVESIAEQMENPDLK	1xDeamidated [N/Q]; 1xOxidation [M9]	0	30.32	97	5.02811e+06	3.95422e+06	3.60254e+06	3.65258e+06	4.21485e+06	5.46961e+06	2.68868e+06	4.79655e+06	4.79845e+06	2.89786e+06	5.71799e+06	4.53077e+06	4.21451e+06	4.9758e+06	5.59761e+06	6.1447e+06	17.7	20.9	29.7	32.3	15.9	-1.02	0.837	-1.01	0.879	1.06	0.745	1.07	0.828
Q96EB6	NAD-dependent protein deacetylase sirtuin-1 OS=Homo sapiens OX=9606 GN=SIRT1 PE=1 SV=2	NYTQNIDTLEQVAGIQR	4xDeamidated [Q4; Q11; N/Q]	0	48.96	26	160607	163049	103191	219973	172229	91173.1	744853	123630	147537	273991	143449	105483	75142.4	65301.9	75976.6	84445.7	23.8	40.4	104	50.7	10.4	2.38	0.448	1.08	0.882	1.13	0.803	-1.94	0.58
Q96EB6	NAD-dependent protein deacetylase sirtuin-1 OS=Homo sapiens OX=9606 GN=SIRT1 PE=1 SV=2	EAEAEAAAAGGEQEAQATAAAGEGDNGPGLQGPSR	1xDeamidated [N/Q]	0	32.74	121	5.46631e+06	2.07057e+06	9.86167e+06	2.81948e+07	1.0393e+07	8.90623e+06	2.42125e+07	1.32669e+07	1.25633e+07	2.12488e+07	1.24881e+07	1.19095e+07	8.35884e+06	8.75567e+06	8.62116e+06	6.97848e+06	67.4	67.8	39.2	34.4	9.99	2.88	0.103	-1.04	0.885	2.73	0.148	-1.1	0.786
Q96EB6	NAD-dependent protein deacetylase sirtuin-1 OS=Homo sapiens OX=9606 GN=SIRT1 PE=1 SV=2	EPPLADNLYDEDDDDEGEEEEEAAAAAIGYR		0	50.87	110	5.82018e+07	5.04229e+07	5.93263e+07	6.62845e+07	6.45089e+07	5.90597e+07	7.57351e+07	6.87101e+07	6.67761e+07	5.65739e+07	7.03361e+07	6.13929e+07	3.43032e+07	3.50289e+07	3.32155e+07	2.85231e+07	8.66	5.95	6.7	11.1	8.93	1.26	0.026	-1.01	0.888	1.13	0.126	-1.12	0.203
Q96EB6	NAD-dependent protein deacetylase sirtuin-1 OS=Homo sapiens OX=9606 GN=SIRT1 PE=1 SV=2	LAVDFPDLPDPQAMFDIEYFRK	1xOxidation [M14]	0	67.19	63	1.34306e+06	193313	445267	1.4214e+06	1.99656e+06	781788	2.14253e+06	954153	108068	3.00562e+06	942548	609104	218441	235998	159777	293655	91.5	43.4	95.7	85.5	24.3	1.62	0.849	1.09	0.888	2.12	0.216	1.42	0.546
Q96EB6	NAD-dependent protein deacetylase sirtuin-1 OS=Homo sapiens OX=9606 GN=SIRT1 PE=1 SV=2	AGGAGFGTDGDDQEAINEAISVK		0	41.11	174	9.61774e+07	6.49473e+07	4.37957e+07	1.4257e+08	5.97984e+07	4.33982e+07	1.15159e+08	6.19675e+07	5.922e+07	9.68479e+07	6.27729e+07	5.08381e+07	3.1086e+07	3.37815e+07	3.45977e+07	3.34209e+07	38.6	64.9	40	34	4.53	1.15	0.667	-1.17	0.891	1.2	0.825	-1.12	0.734
Q96EB6	NAD-dependent protein deacetylase sirtuin-1 OS=Homo sapiens OX=9606 GN=SIRT1 PE=1 SV=2	DLLPETIPPPELDDMTLWQIVINILSEPPK	1xOxidation [M15]	0	68.48	56	358283	95590.3	133008	165068	1.64917e+06	139112	148758	61326.7	57588.7	1.1916e+06	530601	95483.7	128514	103453	66579.8	68912.7	72.6	133	57.8	91.1	32.3	-2.19	0.229	-1.07	0.894	3.33	0.487	6.79	0.156
Q96EB6	NAD-dependent protein deacetylase sirtuin-1 OS=Homo sapiens OX=9606 GN=SIRT1 PE=1 SV=2	NVESIAEQMENPDLK	1xOxidation [M9]	0	29.12	107	1.95277e+08	1.50391e+08	1.70105e+08	1.92909e+08	1.82057e+08	1.90585e+08	1.75156e+08	1.68994e+08	2.01803e+08	1.6593e+08	2.12897e+08	1.8371e+08	1.9156e+08	2.03589e+08	2.13139e+08	2.18164e+08	13.1	3.03	9.58	12.6	5.67	1.06	0.559	-1.01	0.901	1.1	0.324	1.03	0.776
Q96EB6	NAD-dependent protein deacetylase sirtuin-1 OS=Homo sapiens OX=9606 GN=SIRT1 PE=1 SV=2	EAASSPAGEPLR		0	19.9	57	9.17049e+07	9.49232e+07	1.14736e+08	1.09758e+08	1.17993e+08	1.28962e+08	1.04726e+08	1.22811e+08	1.31036e+08	9.74161e+07	1.52388e+08	1.18843e+08	1.38515e+08	1.49713e+08	1.63584e+08	1.62794e+08	12.4	8.1	11.3	22.5	7.76	1.19	0.145	1.03	0.904	1.18	0.12	1.03	0.923
Q96EB6	NAD-dependent protein deacetylase sirtuin-1 OS=Homo sapiens OX=9606 GN=SIRT1 PE=1 SV=2	DNLLFGDEIITNGFHSCESDEEDR	1xCarbamidomethyl [C17]; 1xDeamidated [N12]	0	54.89	62	331393	423692	352058	675545	417923	390954	513446	475266	316555	543977	449160	420537	202942	194835	169862	90922.8	13.1	31.8	24	13.7	31.1	1.18	0.441	-1.05	0.908	1.34	0.258	1.08	0.612
Q96EB6	NAD-dependent protein deacetylase sirtuin-1 OS=Homo sapiens OX=9606 GN=SIRT1 PE=1 SV=2	DLLPETIPPPELDDMTLWQIVINILSEPPKR	1xOxidation [M15]	0	68.18	71	874699	223086	155741	424108	1.98908e+06	54064	490069	55067.2	124254	2.55532e+06	404487	72667.2	194898	349082	121083	73822.6	95	125	105	133	65.2	-1.87	0.426	1.23	0.915	1.97	0.915	4.53	0.449
Q96EB6	NAD-dependent protein deacetylase sirtuin-1 OS=Homo sapiens OX=9606 GN=SIRT1 PE=1 SV=2	AGGAGFGTDGDDQEAINEAISVKQEVTDMNYPSNK		0	50.5	140	2.33048e+06	1.96079e+06	2.3359e+06	3.69759e+06	4.15799e+06	1.78812e+06	4.12967e+06	3.78634e+06	2.67401e+06	3.01708e+06	2.21762e+06	3.72224e+06	558398	334345	174520	289687	9.73	39.1	21.6	25.2	47.4	1.6	0.0585	-1.08	0.92	1.46	0.354	-1.18	0.439
Q96EB6	NAD-dependent protein deacetylase sirtuin-1 OS=Homo sapiens OX=9606 GN=SIRT1 PE=1 SV=2	EVPAAARGCPGAAAAALWR	1xCarbamidomethyl [C9]	0	40.61	18	110011	37739.4	3678.31	118052	27783.9	8807.96	612339	22332.7	37317.4	105670	14124.6	14080.4	5043.84	9114.54	6375.61	14359.8	108	113	150	118	47.3	4.44	0.461	-1.16	0.921	1.02	0.874	-5.02	0.443
Q96EB6	NAD-dependent protein deacetylase sirtuin-1 OS=Homo sapiens OX=9606 GN=SIRT1 PE=1 SV=2	KIIVLTGAGVSVSCGIPDFR	1xCarbamidomethyl [C14]	0	67.16	46	1.06067e+06	665294	155007	3.69487e+06	367666	237140	1.86727e+06	493127	239328	1.99367e+06	354002	330037	30208.4	384770	431465	397756	72.4	137	101	107	60.5	1.38	0.794	-1.61	0.922	2.29	0.747	1.03	0.984
Q96EB6	NAD-dependent protein deacetylase sirtuin-1 OS=Homo sapiens OX=9606 GN=SIRT1 PE=1 SV=2	RKDINTIEDAVK		0	30.68	72	1.19129e+07	1.39193e+07	1.34129e+07	1.15787e+07	1.53541e+07	9.5399e+06	1.14848e+07	1.2875e+07	1.21825e+07	1.24211e+07	1.45111e+07	9.93422e+06	7.60415e+06	9.50739e+06	9.60713e+06	1.18159e+07	7.98	24.3	5.71	18.6	17.9	-1.07	0.295	1.01	0.924	-1.08	0.588	1.01	0.987
Q96EB6	NAD-dependent protein deacetylase sirtuin-1 OS=Homo sapiens OX=9606 GN=SIRT1 PE=1 SV=2	AMKYDKDEVDLLIVIGSSLK		0	67.61	22	177536	349578	21746.7	873790	23843	20474.2	2.65586e+06	76332.8	78372.8	215109	41060.2	72614.6	74738.8	73451.8	127803	55523.1	89.6	161	159	84.6	37.7	5.12	0.603	-2.79	0.925	1.67	0.81	-8.55	0.47
Q96EB6	NAD-dependent protein deacetylase sirtuin-1 OS=Homo sapiens OX=9606 GN=SIRT1 PE=1 SV=2	EAEAEAAAAGGEQEAQATAAAGEGDNGPGLQGPSR	2xDeamidated [Q/N]	0	43.72	124	179724	92195.9	17248.8	14193.5	19903.8	67926.8	233338	95084.2	62829.1	131254	64043	1456.53	69472.4	66487.2	45360.8	3172.41	84.4	86.8	69.5	99	66.3	1.35	0.553	1.93	0.927	-2.83	0.354	-1.99	0.377
Q96EB6	NAD-dependent protein deacetylase sirtuin-1 OS=Homo sapiens OX=9606 GN=SIRT1 PE=1 SV=2	EAEAEAAAAGGEQEAQATAAAGEGDNGPGLQGPSR		0	32.43	130	3.1695e+07	2.88475e+07	2.26024e+07	4.4815e+07	2.32288e+07	1.67561e+07	3.79574e+07	2.25969e+07	2.02002e+07	3.64218e+07	2.30505e+07	1.90774e+07	1.74552e+07	1.60262e+07	1.27e+07	2.6052e+07	16.8	52	35.8	34.7	31.5	-1.03	0.806	-1.08	0.939	1.02	0.868	-1.03	0.928
Q96EB6	NAD-dependent protein deacetylase sirtuin-1 OS=Homo sapiens OX=9606 GN=SIRT1 PE=1 SV=2	NYTQNIDTLEQVAGIQR	1xDeamidated [N/Q]	0	53.89	117	1.71836e+07	1.8667e+07	1.38835e+07	1.68414e+07	1.93063e+07	1.98843e+07	1.66689e+07	2.10542e+07	1.36824e+07	1.4921e+07	2.01682e+07	2.08887e+07	9.24683e+06	6.92284e+06	7.57993e+06	5.16041e+06	14.8	8.65	21.6	17.5	23.4	1.03	0.878	-1	0.942	1.13	0.305	1.09	0.614
Q96EB6	NAD-dependent protein deacetylase sirtuin-1 OS=Homo sapiens OX=9606 GN=SIRT1 PE=1 SV=2	DLLPETIPPPELDDMTLWQIVINILSEPPKR	1xDeamidated [Q/N]	0	68.38	32	24426.5	15516.8	2519.66	79946.5	2658.48	7681.28	60218	15887.6	19003.5	63900.8	3979.79	8628.39	5347.15	6161.13	8992.8	11252	77.8	144	78	131	34.1	2.24	0.305	-1.18	0.943	2.13	0.892	-1.24	0.503
Q96EB6	NAD-dependent protein deacetylase sirtuin-1 OS=Homo sapiens OX=9606 GN=SIRT1 PE=1 SV=2	KDINTIEDAVK	1xDeamidated [N4]	0	27.68	69	6.18973e+06	2.93402e+06	2.36028e+06	7.48847e+06	2.13532e+06	1.59693e+06	7.25033e+06	2.22608e+06	2.14962e+06	4.89092e+06	2.32285e+06	2.04608e+06	2.87613e+06	2.45395e+06	2.65046e+06	3.38616e+06	54	87.1	75.4	50.8	14.1	1.01	0.894	-1.21	0.958	-1.02	0.775	-1.26	0.798
Q96EB6	NAD-dependent protein deacetylase sirtuin-1 OS=Homo sapiens OX=9606 GN=SIRT1 PE=1 SV=2	NVGSSTGEKNER		0	12.52	76	3.53753e+07	1.32042e+08	2.24083e+07	8.93994e+07	7.25452e+06	1.44605e+07	1.52471e+08	1.55729e+07	2.03631e+07	1.55206e+08	5.50718e+06	9.06593e+06	2.90267e+08	3.6548e+07	2.22208e+07	7.27029e+07	94.7	123	124	151	119	-1.01	0.789	1.53	0.963	-1.71	0.436	-1.11	0.658
Q96EB6	NAD-dependent protein deacetylase sirtuin-1 OS=Homo sapiens OX=9606 GN=SIRT1 PE=1 SV=2	AGGAGFGTDGDDQEAINEAISVKQEVTDMNYPSNKS		0	50.34	105	4.56894e+06	7.42492e+06	6.54529e+06	8.44451e+06	9.43729e+06	4.29689e+06	9.9599e+06	8.78958e+06	6.13283e+06	7.17834e+06	4.80444e+06	1.03773e+07	1.31341e+06	995214	407828	867391	23.7	36.9	23.6	37.5	41.9	1.34	0.226	1.01	0.967	1.2	0.646	-1.11	0.642
Q96EB6	NAD-dependent protein deacetylase sirtuin-1 OS=Homo sapiens OX=9606 GN=SIRT1 PE=1 SV=2	GCMEEKPQEVQTSR	1xCarbamidomethyl [C2]; 1xOxidation [M3]	0	14.13	96	5.67524e+07	6.30193e+07	7.17193e+07	5.61263e+07	8.69231e+07	9.47111e+07	4.92274e+07	7.64525e+07	8.98346e+07	5.22743e+07	9.97909e+07	8.5858e+07	8.52622e+07	9.52045e+07	1.05734e+08	9.98305e+07	11.8	25.7	28.8	30.8	8.96	1.13	0.67	1	0.969	1.24	0.354	1.1	0.742
Q96EB6	NAD-dependent protein deacetylase sirtuin-1 OS=Homo sapiens OX=9606 GN=SIRT1 PE=1 SV=2	AGGAGFGTDGDDQEAINEAISVKQEVTDMNYPSNK	1xDeamidated [Q/N]	0	52.4	127	190539	294677	356026	259063	150503	84928.5	192247	296384	265716	74482.1	166916	282650	133391	36266.1	18011.8	272250	29.8	53.4	21.3	59.7	101	-1.12	0.705	1.06	0.971	-1.7	0.2	-1.44	0.337
Q96EB6	NAD-dependent protein deacetylase sirtuin-1 OS=Homo sapiens OX=9606 GN=SIRT1 PE=1 SV=2	TSVAGTVRK		0	13.63	34	1.24289e+07	3.07869e+07	1.87605e+07	5.50258e+06	8.61409e+06	1.13785e+07	9.91307e+06	1.25732e+07	1.16074e+07	1.37987e+07	2.81103e+06	1.29886e+07	1.6323e+07	1.81092e+07	1.77273e+07	1.89596e+07	45.1	34.6	11.8	62.1	6.18	-1.82	0.172	1.16	0.971	-2.43	0.0653	-1.15	0.57
Q96EB6	NAD-dependent protein deacetylase sirtuin-1 OS=Homo sapiens OX=9606 GN=SIRT1 PE=1 SV=2	YDKDEVDLLIVIGSSLK		0	67.49	120	4.78255e+06	5.11473e+06	546232	1.50556e+07	3.04911e+06	835170	4.20018e+06	2.08145e+06	2.01907e+06	1.5504e+07	1.40876e+06	1.60469e+06	285404	2.62696e+06	2.07526e+06	1.44396e+06	73.2	121	44.9	131	62.5	-1.26	0.914	-1.02	0.98	1.81	0.768	2.23	0.802
Q96EB6	NAD-dependent protein deacetylase sirtuin-1 OS=Homo sapiens OX=9606 GN=SIRT1 PE=1 SV=2	SNDDLDVSESKGCMEEKPQEVQTSR	1xCarbamidomethyl [C13]; 1xDeamidated [Q]; 1xOxidation [M14]	0	21.45	80	544371	34193.6	1.78144e+06	252882	1.69844e+06	1.28893e+06	51883.9	863623	800427	238623	1.74333e+06	1.26356e+06	8814.71	9023.95	8022.88	7258.85	114	69	78.9	71	9.73	-1.38	0.987	1	0.985	1.37	0.527	1.89	0.472
Q96EB6	NAD-dependent protein deacetylase sirtuin-1 OS=Homo sapiens OX=9606 GN=SIRT1 PE=1 SV=2	CPADEPLAIMKPEIVFFGENLPEQFHR	1xCarbamidomethyl [C1]	0	67.37	95	2.26274e+07	8.86005e+06	2.42399e+06	3.5644e+07	2.81771e+07	2.8326e+06	3.84922e+07	1.12561e+07	5.76452e+06	6.69364e+07	6.79423e+06	6.34769e+06	986949	6.4389e+06	2.87763e+06	8.43287e+06	91.3	77.4	94.7	131	71.9	1.64	0.558	1.2	0.997	1.97	0.601	1.44	0.962
Q96EB6	NAD-dependent protein deacetylase sirtuin-1 OS=Homo sapiens OX=9606 GN=SIRT1 PE=1 SV=2	DINTIEDAVK	1xDeamidated [N3]	0	30.65	37	8.6537e+06	8.92751e+06	1.00124e+07	8.52703e+06	8.31381e+06	9.79977e+06	7.4541e+06	7.83566e+06	9.11693e+06	7.84663e+06	9.56266e+06	9.25808e+06	1.03785e+07	1.12397e+07	1.14943e+07	1.22901e+07	7.81	9.05	10.7	10.3	6.94	-1.13	0.179	1	1	-1.04	0.625	1.09	0.362
